# Supplementary material for: Regulation of fatty acid and flavonoid biosynthesis by miRNAs in Lonicera japonica
Source: Royal Society of Chemistry journal article supplement (doi:10.1039/c7ra05800d), 2017-01-01
Supplement: c7ra05800d1.pdf [file c7ra05800d1.pdf]

## Supplementary Tables

Supplementary Table 1. Significance test for the differences in miRNA expression between SO1 and SO2.

| miRNA name | SO1 expression | SO2 expression | Fold-change (log 2) | FDR         | Sig. label |
|------------|----------------|----------------|---------------------|-------------|------------|
| U436803    | 6822.3328      | 86.8613        | -6.295407778        | 0           | **         |
| U2899953   | 23607.4373     | 0              | -37.78045048        | 0           | **         |
| U1874742   | 84.7495        | 0              | -29.65862962        | 0.205580337 |            |
| U3938865   | 292.3857       | 0              | -31.44522561        | 0.048798881 | **         |
| U3767208   | 593.2463       | 0              | -32.46598405        | 0.004175036 | **         |
| U4351355   | 423.7474       | 203.9353       | -1.055092997        | 0.093419462 |            |
| U3692923   | 371.2834       | 74.4526        | -2.318126678        | 0.068567883 |            |
| U3528275   | 0              | 65.146         | 29.27910136         | 0.249159965 |            |
| U3400834   | 3979.6941      | 4495.0742      | 0.175687388         | 0.043483175 |            |
| U805963    | 1407.783       | 86.8613        | -4.018567615        | 0.000345228 | **         |
| U4196784   | 185.6417       | 0              | -30.78987367        | 0.104489975 |            |
| U490396    | 84.7495        | 0              | -29.65862962        | 0.205580337 |            |
| U2743257   | 0              | 173.7227       | 30.69413913         | 0.148183292 |            |
| U2869165   | 81.2182        | 0              | -29.59722781        | 0.205580337 |            |
| U1645883   | 1380.7102      | 0              | -33.68469149        | 0           | **         |
| U892530    | 5739.4228      | 608.0294       | -3.238692667        | 0           | **         |
| U977315    | 88.6017        | 213.2051       | 1.266835664         | 0.147530486 |            |
| U4992168   | 464.1043       | 818.9783       | 0.819376162         | 0.071802059 |            |
| U5207555   | 1016.9937      | 135.9569       | -2.903089465        | 0.002232094 | **         |

\*\* . FDR < 0.01, fold change (log2) >1 or fold change (log2) < -1

\* . 0.01 ≤ FDR < 0.05, fold change (log2) >1 or fold change (log2) < -1

Supplementary Table 2. Significance test for the differences in miRNA expression between SO2 and SO3.

| <b>miRNA name</b> | <b>SO2<br/>expression</b> | <b>SO3<br/>expression</b> | <b>Fold-change<br/>(log2)</b> | <b>FDR</b>  | <b>Sig.<br/>label</b> |
|-------------------|---------------------------|---------------------------|-------------------------------|-------------|-----------------------|
| U436803           | 86.8613                   | 743.4526                  | 3.097455314                   | 0.018664382 | **                    |
| U2899953          | 0                         | 2761.3953                 | 34.68467838                   | 0           | **                    |
| U1874742          | 0                         | 914.3081                  | 33.09003325                   | 0.000303425 | **                    |
| U3938865          | 0                         | 191.1735                  | 30.83223541                   | 0.13049718  |                       |
| U3767208          | 0                         | 498.7135                  | 32.21556411                   | 0.010805423 | **                    |
| U4351355          | 203.9353                  | 831.1892                  | 2.02706539                    | 0.018510519 | **                    |
| U3692923          | 74.4526                   | 546.2101                  | 2.875061855                   | 0.03254126  | **                    |
| U3528275          | 65.146                    | 0                         | -29.27910136                  | 0.305498699 |                       |
| U3400834          | 4495.0742                 | 955.8676                  | -2.233462225                  | 0           | **                    |
| U805963           | 86.8613                   | 0                         | -29.6941383                   | 0.305498699 |                       |
| U4196784          | 0                         | 1365.5251                 | 33.66873678                   | 1.33E-05    | **                    |
| U490396           | 2410.4021                 | 3743.8147                 | 0.635235196                   | 0.014080417 | **                    |
| U2743257          | 173.7227                  | 0                         | -30.69413913                  | 0.18118312  |                       |
| U2869165          | 4429.9282                 | 9479.0203                 | 1.097454642                   | 0           | **                    |
| U1645883          | 0                         | 159.3113                  | 30.56920146                   | 0.13049718  |                       |
| U892530           | 608.0294                  | 0                         | -32.50149394                  | 0.017674561 | **                    |
| U977315           | 213.2051                  | 0                         | -30.9895948                   | 0.114415744 |                       |
| U4992168          | 0                         | 16659.4066                | 37.27754606                   | 0           | **                    |
| U5207555          | 0                         | 106.2075                  | 29.9842385                    | 0.257534573 |                       |

\*\* . FDR < 0.01, fold change (log2) >1 or fold change (log2) < -1

\* . 0.01<=FDR<0.05, fold change (log2) >1 or fold change (log2) < -1

Supplementary Table 3. Primers for miRNAs used in quantitative real-time polymerase chain reactions.

| <b>miRNA name</b> | <b>Primer sequence (5'to3')</b> | <b>Base No.</b> |
|-------------------|---------------------------------|-----------------|
| U436803           | CGGCTCGGCAATACATGG              | 18              |
| U2899953          | CCGCCTCCGCCATACATAG             | 19              |
| U1874742          | TGCCGCCACCAAATTTTATC            | 20              |
| U3938865          | GTCCTGCTAAATGCATTTAGCACC        | 24              |
| U3767208          | CGTAAATGCATTTAGCACCATCTGG       | 25              |
| U4351355          | TCAAATGCATTTAGCACCTTCTGAAT      | 26              |
| U3692923          | CGTGCGCGCAGAGGATC               | 17              |
| U3528275          | CGCCGCCGTTTATAATTATTAGACAT      | 26              |
| U3400834          | GCGGCTTTCATAATCATTAGACCT        | 24              |
| U805963           | GCCGTTAGCACCATATGTGAAC          | 22              |
| U4196784          | CGTGTCTCTCAGAGGACGAAAGC         | 23              |
| U490396           | TTTTAGTGACGGTTTTTCATCGC         | 23              |
| U2743257          | TGGCATGATCGATCATGGGTC           | 21              |
| U2869165          | CGAGTCTCAAACGGGGGGT             | 19              |
| U1645883          | CGGCGGTATATTTCAATTTTGTAGTT      | 26              |
| U892530           | GGCGGGTTTAACTCAGCAAAC           | 21              |
| U977315           | GCGTTAAGAGTCCAGTTTCCTTTTG       | 25              |
| U4992168          | CGATGTGCATGTTACCTTGGTCC         | 23              |
| U5207555          | CGGCGTTTTTATCGGGTGTATTA         | 23              |
| U3868172          | GCATTTAGCACCCCCTGGAC            | 20              |
| U534122           | TATGGACTGCGATATGAACTTTGC        | 24              |

Supplementary Table 4. Primers for target genes used in quantitative real-time polymerase chain reactions.

| Target gene | Forward primer sequence (5'to3') | Reverse primer sequence (5'to3') |
|-------------|----------------------------------|----------------------------------|
| FLJ621761   | GCACAGTTGCCCTAAATCTT             | CGGTGACAGCCTCAAATCC              |
| FLJ622887   | GGAAGGCGATTGAAGTGCT              | CTGTAATCCCATCCATCTCCC            |
| FLJ527490   | AGCAAGGAAACTCCCCGATG             | GTCCAAATGAAGATGCCAACA            |
| FLJ626161   | TGCTTCACCAAGAACGATGTC            | AACTGATGCGGGCGGAGG               |
| FLJ617272   | GCCCATTGAAGGCTGTATCG             | TAGGGTTCCGTTTACTGCTCTG           |
| FLJ621815   | GTGCCCTCTACGCCCTTGG              | GTCGCCGTTTGGGGTTACT              |
| FLJ621816   | GTGCCCTCTACGCCCTTGG              | GCCCCGTTTGGGGTTACTTTTA           |
| FLJ602301   | CTCCACCCATTGAACCCCA              | ACGGCGACAACCACCTATTC             |
| FLJ616544   | GCTGTCCGTGCTCATCTCC              | CTGAATGCCATCTGTGCTGTT            |
| FLJ575285   | GGAGTATTGCCTTGAAGCCAAT           | GGTGCTCCCAAGAATGAACAAC           |
| FLJ614363   | CTCTGCGGTTTGACTTTTTTTCTA         | TTCCGATGGGGTTTCTGTTA             |
| FLJ613223   | AATGGTGATGGTAGATGCTCGTAG         | GAAGTCTGAAACTGAATGGCTGTG         |
| FLJ617315   | AATCGTTTGTGCGTGGTTATCTTGTA       | GTTCTGGGTTCTTCTTTGTCTGG          |
| FLJ621731   | GTGGTTCGGGTCTGGGTCA              | TCCCTACTGATTCTGGTCTTTGGT         |
| FLJ625614   | TTGTCCACTGCGTGTGTTAC             | AAAATCCCCACTTGTCAAATGTC          |
| FLJ626117   | TTCGCAAGGATATGATATTGGC           | GTGTGATTATTCGCATGGACAGTA         |
| FLJ626356   | GTTGGACAAGTAATTCAGCCCTT          | GTCTTGACAGTCTTGGGTGCGC           |
| FLJ623552   | GCAGCACCCAAACGAACAC              | CCCTGGAGGCACCGACTT               |
| FLJ419428   | TGGTTACGAAGTAGTCCCTCAAGC         | GCATCCCTGGGCGGTTT                |
| FLJ613583   | ACCACTTGTATCACGGTCCCA            | CACTTCCACTTTGAGCTTCTCG           |
| FLJ615228   | ACGGAAGGTTTCATTCGCAGAC           | GCCAGGCTCGGACAGGAC               |
| FLJ612000   | CAAATAAATCCTTACGGCTTCCC          | CCCCATTTGGATTACAACGAAC           |
| LJ18S       | CGTTGACTACGTCCCTGCCCTT           | GTTACCTACGAAACCTTGTTACGAC        |

Supplementary Table 5. Different members of the conserved miRNA families identified in *Lonicera japonica* buds and their abundance.

| Family | Tag ID                 | Mature miRNA ID | Mature length | Total read count | Mature read count | Mature read count: SO1 | Mature read count: SO2 | Mature read count: SO3 | SO1/SO2 | SO2/SO3 |
|--------|------------------------|-----------------|---------------|------------------|-------------------|------------------------|------------------------|------------------------|---------|---------|
| miR398 | scaffold68065_498379   | ahy-miR398      | 20            | 29               | 21                | 10                     | 5                      | 6                      | 2.00    | 0.83    |
| miR156 |                        |                 |               | 7479             | 7056              | 3007                   | 2696                   | 1353                   | 1.12    | 1.99    |
|        | scaffold260573_1862797 | ata-miR156c-5p  | 20            | 668              | 653               | 277                    | 248                    | 128                    | 1.12    | 1.94    |
|        | scaffold260573_1862791 | ata-miR156c-5p  | 20            | 668              | 653               | 277                    | 248                    | 128                    | 1.12    | 1.94    |
|        | scaffold427616_3136718 | ata-miR156d-5p  | 20            | 657              | 653               | 277                    | 248                    | 128                    | 1.12    | 1.94    |
|        | C14797142_4141376      | mdm-miR156y     | 20            | 426              | 426               | 210                    | 142                    | 74                     | 1.48    | 1.92    |
|        | scaffold427616_3136720 | osa-miR156c-5p  | 20            | 662              | 653               | 277                    | 248                    | 128                    | 1.12    | 1.94    |
|        | scaffold274818_1965599 | tcc-miR156c     | 20            | 672              | 653               | 277                    | 248                    | 128                    | 1.12    | 1.94    |
|        | scaffold331043_2365354 | vun-miR156a     | 20            | 1436             | 1355              | 567                    | 533                    | 255                    | 1.06    | 2.09    |
|        | scaffold451491_3426148 | zma-miR156f-5p  | 20            | 654              | 653               | 277                    | 248                    | 128                    | 1.12    | 1.94    |
|        | C17254521_5218054      | zma-miR156h-5p  | 20            | 1636             | 1357              | 568                    | 533                    | 256                    | 1.07    | 2.08    |
| miR395 |                        |                 |               | 236              | 228               | 212                    | 10                     | 6                      | 21.20   | 1.67    |
|        | scaffold175966_1257963 | ata-miR395b-3p  | 18            | 119              | 114               | 106                    | 5                      | 3                      | 21.20   | 1.67    |
|        | scaffold101358_734703  | ata-miR395b-3p  | 18            | 117              | 114               | 106                    | 5                      | 3                      | 21.20   | 1.67    |
| miR157 |                        |                 |               | 4223             | 3444              | 1944                   | 1016                   | 484                    | 1.91    | 2.10    |
|        | C17157180_5137902      | ath-miR157d     | 20            | 428              | 428               | 210                    | 142                    | 76                     | 1.48    | 1.87    |
|        | C16703292_4843146      | ath-miR157d     | 20            | 3795             | 3016              | 1734                   | 874                    | 408                    | 1.98    | 2.14    |
| miR160 |                        |                 |               | 3003             | 2980              | 637                    | 801                    | 1542                   | 0.80    | 0.52    |
|        | scaffold298284_2131838 | bdi-miR160f     | 20            | 742              | 727               | 157                    | 195                    | 375                    | 0.81    | 0.52    |
|        | scaffold44995_333199   | gma-miR160c     | 20            | 739              | 739               | 158                    | 202                    | 379                    | 0.78    | 0.53    |
|        | scaffold131300_946101  | gma-miR160c     | 20            | 726              | 726               | 157                    | 194                    | 375                    | 0.81    | 0.52    |
|        | scaffold66434_486798   | gma-miR160c     | 20            | 733              | 726               | 157                    | 194                    | 375                    | 0.81    | 0.52    |

|        |                        |                |    |         |         |        |        |        |      |      |
|--------|------------------------|----------------|----|---------|---------|--------|--------|--------|------|------|
|        | scaffold211337_1513044 | ptc-miR160h    | 21 | 32      | 31      | 4      | 8      | 19     | 0.50 | 0.42 |
|        | scaffold439290_3260827 | ptc-miR160h    | 21 | 31      | 31      | 4      | 8      | 19     | 0.50 | 0.42 |
| miR164 |                        |                |    | 1907    | 1844    | 883    | 479    | 482    | 1.84 | 0.99 |
|        | scaffold341437_2440289 | gma-miR164d    | 20 | 1896    | 1833    | 881    | 478    | 474    | 1.84 | 1.01 |
|        | scaffold258572_1848876 | rco-miR164d    | 21 | 11      | 11      | 2      | 1      | 8      | 2.00 | 0.13 |
| miR171 |                        |                |    | 2804    | 2764    | 1193   | 875    | 696    | 1.36 | 1.26 |
|        | scaffold64814_474960   | gma-miR171u    | 21 | 488     | 488     | 225    | 167    | 96     | 1.35 | 1.74 |
|        | scaffold388847_2797390 | sbi-miR171f    | 21 | 48      | 46      | 15     | 21     | 10     | 0.71 | 2.10 |
|        | scaffold454824_3485698 | tcc-miR171f    | 21 | 484     | 484     | 225    | 165    | 94     | 1.36 | 1.76 |
|        | C16996265_5019132      | zma-miR171a-3p | 20 | 89      | 74      | 29     | 9      | 36     | 3.22 | 0.25 |
|        | scaffold271809_1943909 | zma-miR171b-3p | 20 | 245     | 242     | 87     | 63     | 92     | 1.38 | 0.68 |
|        | scaffold314938_2250311 | zma-miR171b-3p | 20 | 715     | 715     | 306    | 225    | 184    | 1.36 | 1.22 |
|        | scaffold65369_478753   | zma-miR171b-3p | 20 | 735     | 715     | 306    | 225    | 184    | 1.36 | 1.22 |
| miR390 | C15771313_4441918      | gma-miR390e    | 20 | 4193    | 4192    | 2294   | 1140   | 758    | 2.01 | 1.50 |
| miR408 | C15802979_4453414      | gma-miR408d    | 20 | 149     | 123     | 22     | 51     | 50     | 0.43 | 1.02 |
| miR167 |                        |                |    | 4974    | 3861    | 1192   | 1360   | 1309   | 0.88 | 1.04 |
|        | C17318141_5273496      | lja-miR167a    | 20 | 2406    | 1312    | 404    | 464    | 444    | 0.87 | 1.05 |
|        | scaffold332904_2378757 | lja-miR167b    | 20 | 1257    | 1254    | 396    | 436    | 422    | 0.91 | 1.03 |
|        | C16674072_4827851      | lja-miR167b    | 20 | 1311    | 1295    | 392    | 460    | 443    | 0.85 | 1.04 |
| miR166 |                        |                |    | 1511444 | 1511429 | 337584 | 688401 | 485444 | 0.49 | 1.42 |
|        | C17193006_5165570      | vvi-miR166a    | 19 | 755505  | 755497  | 168767 | 344093 | 242637 | 0.49 | 1.42 |
|        | scaffold449762_3399267 | vvi-miR166a    | 19 | 755939  | 755932  | 168817 | 344308 | 242807 | 0.49 | 1.42 |
| miR162 | C16967879_5000016      | zma-miR162-3p  | 20 | 10898   | 10891   | 3047   | 4054   | 3790   | 0.75 | 1.07 |
| miR172 | scaffold260832_1865208 | zma-miR172c-3p | 20 | 735     | 734     | 145    | 175    | 414    | 0.83 | 0.42 |

Supplementary Table 6. Potential novel miRNAs identified in *Lonicera japonica* buds and their abundance.

| mature miRNA ID        | mature length | mature sequence          | mismatch | total read count | mature read count | u | c  | g | a | SO1   | SO2   | SO3   |
|------------------------|---------------|--------------------------|----------|------------------|-------------------|---|----|---|---|-------|-------|-------|
| scaffold15788_119320   | 21            | ccggcgucgucauugcaccac    | 0        | 167641           | 157879            | 4 | 9  | 5 | 3 | 36646 | 82899 | 38334 |
| C14572468_4080997      | 21            | ugugaagguaguccaauccac    | 0        | 92385            | 62265             | 5 | 5  | 5 | 6 | 29511 | 18752 | 14002 |
| scaffold448500_3382204 | 24            | gaucuuagagcggguguagcgcc  | 0        | 27322            | 27285             | 5 | 5  | 9 | 5 | 15131 | 6469  | 5685  |
| scaffold249015_1781633 | 24            | gaucuuagagcggguguagcgcc  | 0        | 27293            | 27285             | 5 | 5  | 9 | 5 | 15131 | 6469  | 5685  |
| C15995813_4525693      | 24            | acgacugucgucagcucuuugcc  | 0        | 17746            | 17689             | 6 | 8  | 7 | 3 | 5937  | 3551  | 8201  |
| C15779847_4444958      | 22            | uuuccaacggaaugaaccggu    | 0        | 14339            | 13828             | 5 | 6  | 5 | 6 | 4891  | 4505  | 4432  |
| scaffold450591_3411827 | 21            | cucccagaccaccuauuccgc    | 0        | 11880            | 11612             | 4 | 11 | 2 | 4 | 1921  | 3104  | 6587  |
| scaffold446926_3358093 | 21            | gaugugggagucucuaaccuu    | 0        | 8310             | 6486              | 7 | 4  | 6 | 4 | 1135  | 1728  | 3623  |
| scaffold22189_165384   | 20            | uuugauacgcaccugaaucg     | 0        | 8241             | 8237              | 6 | 5  | 4 | 5 | 3007  | 2765  | 2465  |
| scaffold116612_843168  | 24            | auuccaggaauccugaaaaacucc | 0        | 6599             | 6596              | 5 | 7  | 3 | 9 | 2461  | 2529  | 1606  |
| scaffold265913_1901252 | 24            | auguacaacucauuuaugcaccg  | 0        | 6013             | 6012              | 6 | 7  | 3 | 8 | 2302  | 1090  | 2620  |
| scaffold43179_319667   | 24            | gaauguacaacucauuuaugcacc | 0        | 6012             | 6012              | 6 | 6  | 3 | 9 | 2302  | 1090  | 2620  |
| C16489664_4735437      | 24            | auuuucaugugacaaaaggcauc  | 0        | 5952             | 5122              | 7 | 5  | 4 | 8 | 2608  | 2232  | 282   |
| scaffold279044_1994946 | 22            | cauaguuggagggaugguaccc   | 0        | 5904             | 5838              | 5 | 4  | 8 | 5 | 3701  | 1765  | 372   |
| scaffold352259_2521123 | 21            | aaucuucaaccacacucuugu    | 0        | 5832             | 5266              | 7 | 7  | 1 | 6 | 969   | 1912  | 2385  |
| C16134279_4579801      | 21            | uggccaaagcccuggauugu     | 0        | 5814             | 5441              | 5 | 5  | 7 | 4 | 2470  | 1170  | 1801  |
| scaffold156510_1123797 | 24            | aaucaccgaagacagcgucucgc  | 0        | 5686             | 5685              | 4 | 8  | 5 | 7 | 1462  | 2111  | 2112  |
| scaffold445834_3342781 | 24            | gaauguacaacucauuuaugcacc | 0        | 5451             | 5423              | 6 | 6  | 3 | 9 | 1993  | 937   | 2493  |
| scaffold70512_515044   | 24            | gaauguacaacucauuuaugcacc | 0        | 5440             | 5433              | 6 | 6  | 3 | 9 | 1992  | 943   | 2498  |
| scaffold448004_3373070 | 24            | gaauguacaacucauuuaugcacc | 0        | 5434             | 5433              | 6 | 6  | 3 | 9 | 1992  | 943   | 2498  |
| scaffold216047_1544663 | 20            | uugcauacgcaccugaaucg     | 0        | 5418             | 5139              | 5 | 6  | 4 | 5 | 2240  | 1763  | 1136  |

|                        |    |                          |   |      |      |   |   |   |    |      |      |      |
|------------------------|----|--------------------------|---|------|------|---|---|---|----|------|------|------|
| C17294129_5252514      | 24 | gaauguacaacucauuuaugcacc | 0 | 5418 | 5418 | 6 | 6 | 3 | 9  | 1989 | 937  | 2492 |
| scaffold235013_1681297 | 24 | gaauguacaacucauuuaugcacc | 0 | 5411 | 5411 | 6 | 6 | 3 | 9  | 1993 | 935  | 2483 |
| scaffold210246_1505660 | 21 | aaucuuaaccacacucuugu     | 0 | 5048 | 5037 | 7 | 7 | 1 | 6  | 946  | 1864 | 2227 |
| scaffold415423_3021538 | 24 | ugagaccggcugcuaagagccuca | 0 | 5017 | 4996 | 4 | 7 | 7 | 6  | 2065 | 1442 | 1489 |
| C14694622_4113823      | 24 | ugagaccggcugcuaagagccuuu | 0 | 5007 | 4994 | 6 | 6 | 7 | 5  | 2065 | 1441 | 1488 |
| C12844621_3648542      | 24 | cguacggauugguccuuuggcac  | 0 | 4487 | 4486 | 7 | 6 | 8 | 3  | 1888 | 1745 | 853  |
| C15408413_4321110      | 24 | gacaaccuugggucgacuuggagc | 0 | 3368 | 3367 | 5 | 6 | 8 | 5  | 1082 | 995  | 1290 |
| scaffold455342_3498393 | 24 | aguacggauugguccauuuggcac | 0 | 3179 | 3178 | 7 | 5 | 7 | 5  | 1399 | 1246 | 533  |
| C14333963_4019278      | 24 | aaaauauggacugcaauaugaacu | 0 | 3002 | 2133 | 6 | 3 | 4 | 11 | 916  | 356  | 861  |
| C12894035_3660735      | 24 | gugaacagugacugugaacaguac | 0 | 2911 | 2101 | 5 | 4 | 7 | 8  | 1037 | 770  | 294  |
| C14531674_4070525      | 24 | gugaacagugacugugaacaguac | 0 | 2802 | 2516 | 5 | 4 | 7 | 8  | 1280 | 885  | 351  |
| C14618470_4093364      | 24 | gugaacagugacugugaacaguac | 0 | 2799 | 2723 | 5 | 4 | 7 | 8  | 1400 | 926  | 397  |
| C14281441_4006091      | 24 | gugaacagugacugugaacaguac | 0 | 2778 | 2746 | 5 | 4 | 7 | 8  | 1411 | 931  | 404  |
| scaffold452364_3440537 | 24 | gccuugaggucaaggguucgacuc | 0 | 2768 | 2582 | 6 | 6 | 8 | 4  | 912  | 794  | 876  |
| C14195235_3984734      | 24 | gugaacagugacugugaacaguac | 0 | 2755 | 2712 | 5 | 4 | 7 | 8  | 1396 | 920  | 396  |
| scaffold188816_1348468 | 24 | gugaacagugacugugaacaguac | 0 | 2737 | 2729 | 5 | 4 | 7 | 8  | 1403 | 927  | 399  |
| scaffold106349_769705  | 24 | uuugccggcauauccgacucuguc | 0 | 2359 | 2355 | 8 | 8 | 5 | 3  | 889  | 612  | 854  |
| scaffold19561_146689   | 24 | aaaauauggacugcaauaugaacu | 0 | 2356 | 1760 | 6 | 3 | 4 | 11 | 788  | 230  | 742  |
| scaffold455342_3498394 | 24 | aguacggauugguccauuuggcac | 0 | 2271 | 2270 | 7 | 5 | 7 | 5  | 1051 | 895  | 324  |
| scaffold120449_870012  | 24 | gugaacagugacugugaacaguac | 0 | 2206 | 2019 | 5 | 4 | 7 | 8  | 1010 | 750  | 259  |
| C12783055_3633717      | 24 | aaaauauggacugcaauaugaacu | 0 | 2134 | 2131 | 6 | 3 | 4 | 11 | 915  | 356  | 860  |
| scaffold448933_3387108 | 24 | aaaauauggacugcaauaugaacu | 0 | 2133 | 2133 | 6 | 3 | 4 | 11 | 916  | 356  | 861  |
| scaffold2353_20437     | 24 | aaaauauggacugcaauaugaacu | 0 | 2113 | 2111 | 6 | 3 | 4 | 11 | 901  | 354  | 856  |
| C13198939_3735665      | 22 | ugccgucaccgugcuuugaac    | 0 | 2112 | 2046 | 6 | 8 | 5 | 3  | 887  | 729  | 430  |
| scaffold135502_976162  | 22 | ccugucgcgggagaaauggcac   | 0 | 2064 | 2058 | 3 | 6 | 8 | 5  | 1129 | 842  | 87   |
| scaffold19474_146121   | 24 | aaaauauggacugcaauaugaacu | 0 | 2023 | 1756 | 6 | 3 | 4 | 11 | 785  | 229  | 742  |



|                        |    |                          |   |      |      |   |   |    |    |      |     |      |
|------------------------|----|--------------------------|---|------|------|---|---|----|----|------|-----|------|
| scaffold137550_990178  | 24 | gaguaugauauacauuguugccc  | 0 | 1986 | 1979 | 8 | 4 | 6  | 6  | 819  | 713 | 447  |
| C12624067_3595385      | 24 | gaguaugauauacauuguugccc  | 0 | 1986 | 1979 | 8 | 4 | 6  | 6  | 819  | 713 | 447  |
| C12830663_3645343      | 24 | gaguaugauauacauuguugccc  | 0 | 1986 | 1979 | 8 | 4 | 6  | 6  | 819  | 713 | 447  |
| scaffold6761_50817     | 24 | aaaauaggacugcaauaugaacu  | 0 | 1966 | 1964 | 6 | 3 | 4  | 11 | 817  | 333 | 814  |
| C13713027_3867164      | 24 | gaguaugauauacauuguugccc  | 0 | 1941 | 1921 | 8 | 4 | 6  | 6  | 797  | 691 | 433  |
| scaffold123982_893722  | 24 | auuccaauugggacuaacuuu    | 0 | 1927 | 1922 | 9 | 5 | 4  | 6  | 528  | 409 | 985  |
| scaffold380374_2731258 | 24 | auuccaauugggacuaacuuu    | 0 | 1926 | 1922 | 9 | 5 | 4  | 6  | 528  | 409 | 985  |
| scaffold205722_1472678 | 24 | aaaauaggacugcaauaugaacu  | 0 | 1808 | 1771 | 6 | 3 | 4  | 11 | 794  | 232 | 745  |
| C13544002_3822838      | 24 | aaaauaggacugcaauaugaacu  | 0 | 1772 | 1764 | 6 | 3 | 4  | 11 | 788  | 231 | 745  |
| scaffold336132_2401318 | 24 | ggaccgaguaagcuguacaacacu | 0 | 1771 | 1771 | 4 | 6 | 6  | 8  | 653  | 356 | 762  |
| scaffold272188_1947262 | 24 | agccuugcucagucgacugaugac | 0 | 1760 | 1751 | 6 | 7 | 6  | 5  | 726  | 581 | 444  |
| scaffold328481_2348990 | 24 | agccuugcucagucgacugaugac | 0 | 1751 | 1751 | 6 | 7 | 6  | 5  | 726  | 582 | 443  |
| scaffold4980_37863     | 24 | agccuugcucagucgacugaugac | 0 | 1751 | 1751 | 6 | 7 | 6  | 5  | 726  | 582 | 443  |
| scaffold230235_1647392 | 24 | aaaauaggacugcaauaugaacu  | 0 | 1750 | 1748 | 6 | 3 | 4  | 11 | 779  | 230 | 739  |
| C13191509_3733720      | 24 | aaaauaggacugcaauaugaacu  | 0 | 1673 | 1658 | 6 | 3 | 4  | 11 | 756  | 199 | 703  |
| C17085044_5082430      | 22 | ccuuguaguugguucagcacc    | 0 | 1673 | 1672 | 7 | 7 | 5  | 3  | 1031 | 633 | 8    |
| scaffold157893_1133245 | 23 | ggauuucacucggguugagagc   | 0 | 1611 | 1223 | 7 | 4 | 7  | 5  | 528  | 357 | 338  |
| scaffold229865_1644414 | 24 | aaaauaggacugcaauaugaacu  | 0 | 1609 | 1592 | 6 | 3 | 4  | 11 | 689  | 206 | 697  |
| C13546590_3823340      | 24 | uuuuuuuucugaauugaauacacc | 0 | 1605 | 1570 | 8 | 4 | 2  | 10 | 766  | 426 | 378  |
| C14125701_3967519      | 24 | uuuuuuuucugaauugaauacacc | 0 | 1571 | 1570 | 8 | 4 | 2  | 10 | 766  | 426 | 378  |
| scaffold448500_3382202 | 24 | gauuuuuggagcggguagcgc    | 0 | 1549 | 1549 | 6 | 4 | 10 | 4  | 140  | 95  | 1314 |
| scaffold74629_544747   | 24 | auugaccuagugucacuuugccc  | 0 | 1523 | 1520 | 8 | 7 | 5  | 4  | 416  | 570 | 534  |
| scaffold103766_751305  | 24 | augaacagugacugagaacaguac | 0 | 1495 | 1464 | 5 | 4 | 6  | 9  | 833  | 433 | 198  |
| scaffold48619_358792   | 24 | uuuuuuuucugaauugaauacacc | 0 | 1486 | 1472 | 8 | 4 | 2  | 10 | 719  | 403 | 350  |
| scaffold19284_144809   | 24 | agaauuugcuuaaggguagacc   | 0 | 1483 | 1483 | 7 | 4 | 7  | 6  | 669  | 298 | 516  |
| C14564026_4078885      | 24 | uuuuuuuucugaauugaauacacc | 0 | 1470 | 1469 | 8 | 4 | 2  | 10 | 715  | 404 | 350  |

|                        |    |                          |   |      |      |    |    |   |    |     |     |     |
|------------------------|----|--------------------------|---|------|------|----|----|---|----|-----|-----|-----|
| C12918719_3666551      | 24 | augaacagugacuguaacaguac  | 0 | 1438 | 1400 | 5  | 4  | 6 | 9  | 809 | 418 | 173 |
| scaffold42037_312335   | 24 | uuuagcaccucuggacagcaacc  | 0 | 1385 | 1379 | 5  | 9  | 4 | 6  | 439 | 452 | 488 |
| scaffold453613_3463247 | 24 | gauuaagggagagacuagaccuc  | 0 | 1385 | 1380 | 5  | 4  | 7 | 8  | 548 | 318 | 514 |
| C13720253_3869485      | 24 | uuuagcaccuccuggacagcaacc | 0 | 1382 | 1377 | 4  | 10 | 4 | 6  | 384 | 522 | 471 |
| C14294049_4009199      | 24 | acuuguagagguuugaucuucacc | 0 | 1364 | 1364 | 9  | 5  | 5 | 5  | 528 | 367 | 469 |
| scaffold215334_1539828 | 24 | cccgaguacuaaaaucgugaacc  | 0 | 1316 | 1291 | 4  | 8  | 4 | 8  | 558 | 378 | 355 |
| scaffold73789_538699   | 23 | aaauauggacugcaauaugaacu  | 0 | 1315 | 966  | 6  | 3  | 4 | 10 | 363 | 227 | 376 |
| scaffold194854_1392170 | 24 | uuuaaaucugaaauugaauacacc | 0 | 1307 | 1199 | 8  | 4  | 2 | 10 | 593 | 321 | 285 |
| C14897710_4169822      | 24 | cccgaguacuaaaaucgugaacc  | 0 | 1295 | 1279 | 4  | 8  | 4 | 8  | 554 | 373 | 352 |
| C14001747_3938024      | 22 | uaccuuggucuuuggauguacuc  | 0 | 1259 | 746  | 9  | 5  | 5 | 3  | 250 | 304 | 192 |
| scaffold237043_1695491 | 23 | aaauauggacugcaauaugaacu  | 0 | 1252 | 1252 | 6  | 3  | 4 | 10 | 510 | 261 | 481 |
| C16736462_4862097      | 23 | aaauauggacugcaauaugaacu  | 0 | 1252 | 1252 | 6  | 3  | 4 | 10 | 510 | 261 | 481 |
| scaffold352259_2521135 | 19 | ugguugaagauuaguugac      | 0 | 1251 | 1180 | 7  | 1  | 6 | 5  | 302 | 530 | 348 |
| C12648617_3601248      | 23 | ggauuucaucucggguugagagc  | 0 | 1227 | 1223 | 7  | 4  | 7 | 5  | 528 | 357 | 338 |
| scaffold25790_194769   | 24 | acuuguagagguuugaucuucacc | 0 | 1217 | 1216 | 9  | 5  | 5 | 5  | 456 | 334 | 426 |
| scaffold91336_663894   | 24 | auuucgguccaugauuugcacc   | 0 | 1208 | 1205 | 8  | 8  | 4 | 4  | 351 | 391 | 463 |
| scaffold231608_1657252 | 24 | aagcgugucugaccgaaauugac  | 0 | 1201 | 1197 | 5  | 6  | 6 | 7  | 506 | 309 | 382 |
| scaffold271707_1943142 | 24 | uuuaaaucugaaauugaauacacc | 0 | 1199 | 1198 | 8  | 4  | 2 | 10 | 594 | 321 | 283 |
| scaffold285140_2039542 | 23 | aaauauggacugcaauaugaacu  | 0 | 1184 | 1176 | 6  | 3  | 4 | 10 | 468 | 245 | 463 |
| scaffold413762_3006951 | 21 | uaugaagguagucuaauccac    | 0 | 1171 | 1036 | 6  | 4  | 4 | 7  | 758 | 199 | 79  |
| scaffold421678_3079443 | 21 | uaugaagguagucuaauccac    | 0 | 1171 | 1036 | 6  | 4  | 4 | 7  | 758 | 199 | 79  |
| scaffold238936_1707818 | 22 | ccaaccggguguguauuugacc   | 0 | 1159 | 1156 | 6  | 6  | 6 | 4  | 516 | 303 | 337 |
| scaffold357919_2562110 | 23 | ggauuucaucucggguugagagc  | 0 | 1153 | 1052 | 7  | 4  | 7 | 5  | 444 | 306 | 302 |
| C14285763_4007142      | 23 | ggauuucaucucggguugagagc  | 0 | 1134 | 1131 | 7  | 4  | 7 | 5  | 490 | 328 | 313 |
| C17431376_5380286      | 24 | auuuuuuugggcuauugagcauu  | 0 | 1130 | 1123 | 13 | 2  | 5 | 4  | 504 | 271 | 348 |
| scaffold321795_2299242 | 18 | ugacaucuaaaccceaaa       | 0 | 1111 | 963  | 2  | 7  | 1 | 8  | 233 | 242 | 488 |

|                        |    |                          |   |      |      |   |   |   |   |     |     |     |
|------------------------|----|--------------------------|---|------|------|---|---|---|---|-----|-----|-----|
| scaffold208287_1491067 | 24 | aaaugcauuuagcaccccuuggac | 0 | 1106 | 1066 | 6 | 7 | 4 | 7 | 498 | 286 | 282 |
| scaffold99472_721384   | 22 | ucccggauugaaggauuccuc    | 0 | 1105 | 1102 | 6 | 6 | 5 | 5 | 527 | 368 | 207 |
| scaffold28420_212381   | 24 | gauggaggugccaagguugaacc  | 0 | 1102 | 1072 | 4 | 5 | 9 | 6 | 384 | 302 | 386 |
| scaffold355542_2544821 | 24 | aaaugcauuuagcaccccuuggac | 0 | 1093 | 1090 | 6 | 7 | 4 | 7 | 505 | 294 | 291 |
| scaffold355542_2544822 | 24 | aaaugcauuuagcaccccuuggac | 0 | 1090 | 1090 | 6 | 7 | 4 | 7 | 505 | 294 | 291 |
| scaffold273043_1953741 | 23 | ggauuucauacucgguugagagc  | 0 | 1078 | 1050 | 7 | 4 | 7 | 5 | 444 | 306 | 300 |
| scaffold210107_1505040 | 24 | aaaugcauuuagcaccccuuggac | 0 | 1070 | 1067 | 6 | 7 | 4 | 7 | 499 | 286 | 282 |
| scaffold155503_1116642 | 24 | aaaugcauuuagcaccccuuggac | 0 | 1067 | 1067 | 6 | 7 | 4 | 7 | 499 | 286 | 282 |
| C15154212_4243495      | 24 | aaaugcauuuagcaccccuuggac | 0 | 1062 | 1060 | 6 | 7 | 4 | 7 | 496 | 284 | 280 |
| C13289391_3758020      | 23 | ggauuucauacucgguugagagc  | 0 | 1060 | 1052 | 7 | 4 | 7 | 5 | 444 | 306 | 302 |
| scaffold126120_908701  | 24 | ggaccgaguaagcuguucaacacu | 0 | 1055 | 755  | 5 | 6 | 6 | 7 | 172 | 198 | 385 |
| scaffold35602_265327   | 22 | aaccgggaaguagguuaacuac   | 0 | 1050 | 1007 | 4 | 4 | 6 | 8 | 435 | 211 | 361 |
| C13389812_3783187      | 24 | ggacugcaauaugaacuugcacu  | 0 | 1037 | 1037 | 7 | 5 | 5 | 7 | 284 | 376 | 377 |
| scaffold399885_2887704 | 24 | augaccgaggcuagaguugacuc  | 0 | 1031 | 1027 | 6 | 5 | 7 | 6 | 384 | 252 | 391 |
| C16212055_4612052      | 21 | cgccaaggagaguugccuu      | 0 | 1017 | 993  | 4 | 6 | 6 | 5 | 227 | 235 | 531 |
| scaffold363528_2603818 | 21 | cgccaaggagaguugccuu      | 0 | 1017 | 993  | 4 | 6 | 6 | 5 | 227 | 235 | 531 |
| scaffold293944_2100564 | 24 | uggacugcaauaugaacuugcac  | 0 | 1001 | 969  | 7 | 5 | 5 | 7 | 337 | 334 | 298 |
| scaffold209003_1496964 | 24 | aaaugcauuuagcaccccuuggac | 0 | 992  | 979  | 6 | 7 | 4 | 7 | 460 | 259 | 260 |
| scaffold209003_1496963 | 24 | aaaugcauuuagcaccccuuggac | 0 | 992  | 980  | 6 | 7 | 4 | 7 | 461 | 259 | 260 |
| C15614531_4389500      | 24 | aaaugcauuuagcaccccuuggac | 0 | 992  | 983  | 6 | 7 | 4 | 7 | 461 | 262 | 260 |
| scaffold170317_1219232 | 24 | uuucaaucauguaguuaaccacu  | 0 | 992  | 987  | 9 | 6 | 2 | 7 | 376 | 283 | 328 |
| scaffold173094_1238529 | 24 | aaaugcauuuagcaccccuuggac | 0 | 990  | 978  | 6 | 7 | 4 | 7 | 461 | 259 | 258 |
| C15094806_4225894      | 24 | aauacgacccgaacuguaaggc   | 0 | 990  | 981  | 4 | 6 | 5 | 9 | 372 | 256 | 353 |
| C13219585_3740793      | 24 | aaaugcauuuagcaccccuuggac | 0 | 988  | 984  | 6 | 7 | 4 | 7 | 462 | 262 | 260 |
| scaffold136379_982167  | 24 | auauaaagcgagucaagccuggac | 0 | 986  | 897  | 4 | 5 | 6 | 9 | 567 | 140 | 190 |
| C13208925_3738081      | 24 | aaaugcauuuagcaccccuuggac | 0 | 984  | 984  | 6 | 7 | 4 | 7 | 462 | 262 | 260 |

|                        |    |                          |   |     |     |   |   |   |    |     |     |     |
|------------------------|----|--------------------------|---|-----|-----|---|---|---|----|-----|-----|-----|
| C14626806_4095566      | 24 | aaaugcauuuagcaccuuuggac  | 0 | 984 | 984 | 6 | 7 | 4 | 7  | 462 | 262 | 260 |
| scaffold73789_538700   | 23 | aaauauggacugcaauaugaacu  | 0 | 983 | 966 | 6 | 3 | 4 | 10 | 363 | 227 | 376 |
| scaffold1286_10357     | 23 | aaauauggacugcaauaugaacu  | 0 | 979 | 969 | 6 | 3 | 4 | 10 | 365 | 227 | 377 |
| scaffold136508_983094  | 24 | uggacugcaauaugaacuuggac  | 0 | 974 | 944 | 7 | 5 | 5 | 7  | 327 | 335 | 282 |
| C13064726_3702576      | 24 | uuucaaucauguaguuaaccacu  | 0 | 968 | 954 | 9 | 6 | 2 | 7  | 342 | 265 | 347 |
| scaffold37191_276962   | 24 | aaaugcauuuagcaccuuuggac  | 0 | 967 | 967 | 6 | 7 | 4 | 7  | 458 | 255 | 254 |
| scaffold34513_257407   | 24 | caaccgaugaaggucggagagc   | 0 | 962 | 387 | 2 | 7 | 7 | 8  | 195 | 97  | 95  |
| scaffold135523_976591  | 24 | uuucaaucauguaguuaaccacu  | 0 | 956 | 954 | 9 | 6 | 2 | 7  | 342 | 265 | 347 |
| C12980661_3682005      | 24 | uucacauugcaguaaaauuggac  | 0 | 954 | 854 | 7 | 4 | 4 | 9  | 421 | 187 | 246 |
| scaffold3982_30400     | 24 | uggacugcaauaugaacuuggac  | 0 | 947 | 944 | 7 | 5 | 5 | 7  | 327 | 335 | 282 |
| scaffold136508_983093  | 24 | uggacugcaauaugaacuuggac  | 0 | 944 | 944 | 7 | 5 | 5 | 7  | 327 | 335 | 282 |
| scaffold253252_1810678 | 24 | uucacauugcaguaaaauuggac  | 0 | 942 | 865 | 7 | 4 | 4 | 9  | 424 | 190 | 251 |
| scaffold432480_3187171 | 24 | auauaaagcgagucaagccuggac | 0 | 929 | 920 | 4 | 5 | 6 | 9  | 571 | 148 | 201 |
| C13000190_3686697      | 24 | uucacauugcaguaaaauuggac  | 0 | 923 | 888 | 7 | 4 | 4 | 9  | 430 | 200 | 258 |
| C13172916_3728930      | 23 | ggauuucacucggguugagagc   | 0 | 916 | 913 | 7 | 4 | 7 | 5  | 359 | 267 | 287 |
| scaffold90876_660523   | 24 | agcuuugcucagucgacugaaggc | 0 | 914 | 632 | 7 | 6 | 7 | 4  | 275 | 184 | 173 |
| scaffold25532_191405   | 24 | uggaccugaguuccuauuaacaau | 0 | 905 | 901 | 8 | 5 | 4 | 7  | 324 | 120 | 457 |
| scaffold265874_1900882 | 22 | uuuuugcuccaauucugaaacc   | 0 | 905 | 901 | 9 | 6 | 2 | 5  | 322 | 389 | 190 |
| C16424384_4705494      | 24 | acaccggauaggauuaauuaaucc | 0 | 902 | 896 | 6 | 5 | 4 | 9  | 355 | 187 | 354 |
| scaffold426596_3126157 | 24 | acaccggauaggauuaauuaaucc | 0 | 899 | 896 | 6 | 5 | 4 | 9  | 355 | 187 | 354 |
| scaffold136379_982169  | 24 | auauaaagcgagucaagccuggac | 0 | 898 | 887 | 4 | 5 | 6 | 9  | 561 | 139 | 187 |
| scaffold46415_342705   | 24 | uucacauugcaguaaaauuggac  | 0 | 897 | 889 | 7 | 4 | 4 | 9  | 431 | 200 | 258 |
| scaffold10994_82118    | 24 | acaccggauaggauuaauuaaucc | 0 | 897 | 896 | 6 | 5 | 4 | 9  | 355 | 187 | 354 |
| C17042903_5052215      | 24 | uucacauugcaguaaaauuggac  | 0 | 896 | 889 | 7 | 4 | 4 | 9  | 431 | 200 | 258 |
| C14855264_4158056      | 23 | aaauauggacugcaauaugaacu  | 0 | 894 | 879 | 6 | 3 | 4 | 10 | 382 | 135 | 362 |
| C12963007_3677722      | 23 | aaauauggacugcaauaugaacu  | 0 | 887 | 883 | 6 | 3 | 4 | 10 | 382 | 136 | 365 |

|                        |    |                          |   |     |     |    |   |   |    |     |     |     |
|------------------------|----|--------------------------|---|-----|-----|----|---|---|----|-----|-----|-----|
| C14855264_4158055      | 23 | aaauauggacugcaauaugaacu  | 0 | 881 | 879 | 6  | 3 | 4 | 10 | 382 | 135 | 362 |
| scaffold402162_2906116 | 23 | aaauauggacugcaauaugaacu  | 0 | 880 | 880 | 6  | 3 | 4 | 10 | 382 | 134 | 364 |
| scaffold334573_2390482 | 22 | uuccauuuuguuguuggcuauu   | 0 | 875 | 522 | 13 | 3 | 4 | 2  | 217 | 304 | 1   |
| C13107645_3713128      | 24 | ggauuucauacucggugagagc   | 0 | 873 | 871 | 7  | 4 | 7 | 6  | 374 | 251 | 246 |
| C16118461_4573928      | 24 | auuucacugcaauaugaacuugc  | 0 | 854 | 716 | 9  | 5 | 3 | 7  | 344 | 140 | 232 |
| C17338363_5291785      | 24 | aagcaauagcucaggacuccacc  | 0 | 849 | 828 | 3  | 8 | 4 | 9  | 497 | 330 | 1   |
| scaffold45100_333788   | 24 | aaaugcauuagcaccuccuggac  | 0 | 818 | 744 | 5  | 8 | 4 | 7  | 207 | 276 | 261 |
| C15661307_4404230      | 24 | aacgugucugaccgaaauugacc  | 0 | 816 | 786 | 5  | 7 | 5 | 7  | 418 | 211 | 157 |
| C16356227_4674302      | 24 | uuacggagcgagaccuuuaacc   | 0 | 816 | 793 | 5  | 7 | 5 | 7  | 324 | 258 | 211 |
| C12994182_3685217      | 24 | uggacugcaauaugaacuugcac  | 0 | 803 | 803 | 7  | 5 | 5 | 7  | 272 | 290 | 241 |
| scaffold342088_2446136 | 24 | aaaugcauuagcaccacuuggac  | 0 | 799 | 779 | 6  | 6 | 4 | 8  | 331 | 219 | 229 |
| scaffold207599_1486249 | 24 | uggacugcaauaugaacuugcac  | 0 | 795 | 773 | 7  | 5 | 5 | 7  | 265 | 276 | 232 |
| C14498198_4061557      | 23 | ggauuucauacucggugagagc   | 0 | 793 | 788 | 7  | 4 | 7 | 5  | 305 | 234 | 249 |
| C15925269_4499972      | 24 | aaaugcauuagcaccacuuggac  | 0 | 791 | 751 | 6  | 6 | 4 | 8  | 319 | 206 | 226 |
| scaffold27493_205797   | 21 | uuucggacuaggcucauucc     | 0 | 786 | 786 | 8  | 6 | 4 | 3  | 431 | 274 | 81  |
| scaffold88666_644530   | 22 | ugugagaaccuucugaccauc    | 0 | 783 | 781 | 6  | 6 | 4 | 6  | 346 | 313 | 122 |
| C13363010_3776460      | 24 | aguuuagaguagagucuugcucc  | 0 | 782 | 779 | 9  | 5 | 6 | 4  | 323 | 247 | 209 |
| scaffold191352_1366698 | 24 | aaugaacuuggcaucuaguggac  | 0 | 778 | 775 | 6  | 4 | 6 | 8  | 423 | 132 | 220 |
| scaffold50731_374206   | 24 | aaaugcauuagcaccuccuggac  | 0 | 775 | 773 | 5  | 8 | 4 | 7  | 212 | 295 | 266 |
| scaffold281495_2012760 | 24 | uauugaccuagugucacuuggcc  | 0 | 773 | 739 | 9  | 6 | 5 | 4  | 180 | 306 | 253 |
| scaffold176006_1258545 | 24 | aaaugcauuagcaccuccuggac  | 0 | 773 | 773 | 5  | 8 | 4 | 7  | 212 | 295 | 266 |
| C15065596_4217520      | 24 | cccggauugguuuaaaucuugaac | 0 | 769 | 764 | 7  | 5 | 5 | 7  | 377 | 170 | 217 |
| C15890153_4485571      | 24 | aaaugcauuagcaccuccuggac  | 0 | 766 | 744 | 5  | 8 | 4 | 7  | 207 | 276 | 261 |
| scaffold392875_2831100 | 24 | aaaugcauuagcaccuccuggac  | 0 | 763 | 742 | 5  | 8 | 4 | 7  | 207 | 276 | 259 |
| scaffold1029_7716      | 24 | aaggaccgaugaaaugggagu    | 0 | 758 | 637 | 3  | 2 | 9 | 10 | 370 | 122 | 145 |
| scaffold358379_2565540 | 24 | aaaugcauuagcaccacuuggac  | 0 | 752 | 751 | 6  | 6 | 4 | 8  | 320 | 206 | 225 |

|                        |    |                          |   |     |     |    |   |   |    |     |     |     |
|------------------------|----|--------------------------|---|-----|-----|----|---|---|----|-----|-----|-----|
| scaffold358379_2565539 | 24 | aaaugcauuuagcaccacuuggac | 0 | 752 | 751 | 6  | 6 | 4 | 8  | 320 | 206 | 225 |
| scaffold336322_2404462 | 24 | aaaugcauuuagcaccuccuggac | 0 | 751 | 743 | 5  | 8 | 4 | 7  | 206 | 276 | 261 |
| scaffold189788_1355050 | 24 | aaaugcauuuagcaccacuuggac | 0 | 751 | 751 | 6  | 6 | 4 | 8  | 317 | 211 | 223 |
| scaffold219007_1565121 | 24 | auuuucauugguuguuagacc    | 0 | 744 | 742 | 11 | 4 | 5 | 4  | 360 | 145 | 237 |
| scaffold82323_598525   | 24 | aaaugcauuuagcaccuccuggac | 0 | 744 | 744 | 5  | 8 | 4 | 7  | 207 | 276 | 261 |
| scaffold86538_629915   | 24 | aaaugcauuuagcaccuccuggac | 0 | 744 | 744 | 5  | 8 | 4 | 7  | 207 | 276 | 261 |
| scaffold63224_464101   | 24 | aaaugcauuuagcaccuccuggac | 0 | 744 | 744 | 5  | 8 | 4 | 7  | 207 | 276 | 261 |
| scaffold246171_1760353 | 24 | uuucaaucauguaguuaaccacu  | 0 | 743 | 727 | 9  | 6 | 2 | 7  | 276 | 195 | 256 |
| scaffold147993_1062673 | 24 | aaaugcauuuagcaccuccuggac | 0 | 743 | 742 | 5  | 8 | 4 | 7  | 207 | 276 | 259 |
| C13466976_3803005      | 24 | auuucacugcaauaugaacuungc | 0 | 740 | 736 | 9  | 5 | 3 | 7  | 353 | 146 | 237 |
| C13369014_3778492      | 24 | aaaugcauuuagcaccuccuggac | 0 | 736 | 721 | 5  | 8 | 4 | 7  | 206 | 267 | 248 |
| scaffold324813_2320593 | 24 | uuacggagcgagaccuuuaaccc  | 0 | 735 | 735 | 5  | 7 | 5 | 7  | 308 | 244 | 183 |
| scaffold329268_2352802 | 24 | auuucacugcaauaugaacuungc | 0 | 729 | 707 | 9  | 5 | 3 | 7  | 342 | 140 | 225 |
| scaffold192244_1374178 | 24 | aaaugcauuuagcaccuccuggac | 0 | 722 | 721 | 5  | 8 | 4 | 7  | 206 | 267 | 248 |
| scaffold95927_697335   | 23 | ggauuucauacucgguugagagc  | 0 | 720 | 714 | 7  | 4 | 7 | 5  | 256 | 217 | 241 |
| C13971771_3930745      | 24 | gaauguguuuaaguaacucgccu  | 0 | 719 | 578 | 8  | 4 | 6 | 6  | 110 | 157 | 311 |
| scaffold95647_696094   | 24 | auuucacugcaauaugaacuungc | 0 | 712 | 702 | 9  | 5 | 3 | 7  | 339 | 139 | 224 |
| scaffold425529_3119556 | 24 | auuucacugcaauaugaacuungc | 0 | 711 | 702 | 9  | 5 | 3 | 7  | 339 | 139 | 224 |
| scaffold202331_1446962 | 24 | auuucacugcaauaugaacuungc | 0 | 707 | 706 | 9  | 5 | 3 | 7  | 341 | 139 | 226 |
| scaffold104495_756278  | 24 | ggaauuucacucgguugagagc   | 0 | 703 | 699 | 7  | 4 | 7 | 6  | 290 | 201 | 208 |
| scaffold83857_609815   | 24 | aaggaccgaauaaaaguggagau  | 0 | 696 | 667 | 3  | 2 | 9 | 10 | 385 | 127 | 155 |
| scaffold171335_1226004 | 23 | aaauauguacugcaauaugaacu  | 0 | 683 | 679 | 7  | 3 | 3 | 10 | 283 | 118 | 278 |
| scaffold112589_814919  | 24 | agcuuugcucagucgacugauggc | 0 | 681 | 678 | 7  | 6 | 7 | 4  | 280 | 191 | 207 |
| scaffold302989_2164674 | 24 | aaauaugcauuuuuuuuggacugc | 0 | 679 | 672 | 7  | 3 | 4 | 10 | 388 | 98  | 186 |
| scaffold120975_873178  | 24 | agcuuugcucagucgacugauggc | 0 | 676 | 632 | 7  | 6 | 7 | 4  | 275 | 184 | 173 |
| scaffold280331_2004462 | 24 | auuuuucacaucauguaguuaacc | 0 | 675 | 674 | 10 | 5 | 2 | 7  | 260 | 214 | 200 |

|                        |    |                           |   |     |     |    |   |   |    |     |     |     |
|------------------------|----|---------------------------|---|-----|-----|----|---|---|----|-----|-----|-----|
| scaffold46442_342852   | 24 | agccuugcucagucgacugauggc  | 0 | 674 | 663 | 6  | 7 | 7 | 4  | 237 | 209 | 217 |
| scaffold134612_969602  | 24 | aaggaccgaauaagaugggagu    | 0 | 671 | 667 | 3  | 2 | 9 | 10 | 385 | 127 | 155 |
| C13123511_3716932      | 24 | auuucacugcaauaagaacuuugc  | 0 | 670 | 670 | 9  | 5 | 3 | 7  | 337 | 137 | 196 |
| C13141861_3721874      | 24 | uauggacugcaauaagaacuuugc  | 0 | 669 | 609 | 8  | 4 | 5 | 7  | 200 | 195 | 214 |
| C14867880_4161311      | 24 | agccuugcucagucgacugauggc  | 0 | 666 | 663 | 6  | 7 | 7 | 4  | 237 | 209 | 217 |
| C17109108_5100246      | 21 | ugugcuucuuuagccaucuccu    | 0 | 665 | 656 | 9  | 7 | 3 | 2  | 250 | 152 | 254 |
| scaffold353959_2533067 | 24 | auuuuucacaucauguaguuaaccc | 0 | 664 | 655 | 10 | 5 | 2 | 7  | 254 | 210 | 191 |
| scaffold423496_3096286 | 21 | ugugcuucuuuagccaucuccu    | 0 | 657 | 656 | 9  | 7 | 3 | 2  | 250 | 152 | 254 |
| scaffold168501_1206157 | 24 | agcuuugcucagucgacugauggc  | 0 | 656 | 628 | 7  | 6 | 7 | 4  | 275 | 182 | 171 |
| C17370398_5320503      | 21 | ugugcuucuuuagccaucuccu    | 0 | 656 | 656 | 9  | 7 | 3 | 2  | 250 | 152 | 254 |
| scaffold160847_1153203 | 24 | uaaccaguguacugaugccacauu  | 0 | 650 | 530 | 7  | 6 | 4 | 7  | 204 | 179 | 147 |
| scaffold357862_2561669 | 23 | uauccacuuucuauguagaa      | 0 | 650 | 650 | 8  | 5 | 2 | 8  | 167 | 117 | 366 |
| scaffold260238_1860696 | 24 | gcuaccagagcggacaauaucgu   | 0 | 644 | 644 | 4  | 7 | 6 | 7  | 222 | 169 | 253 |
| scaffold300980_2150548 | 24 | auuuuuacuuggcacuauagcacc  | 0 | 643 | 642 | 8  | 6 | 3 | 7  | 245 | 232 | 165 |
| scaffold300980_2150547 | 24 | auuuuuacuuggcacuauagcacc  | 0 | 642 | 642 | 8  | 6 | 3 | 7  | 245 | 232 | 165 |
| scaffold300980_2150546 | 24 | auuuuuacuuggcacuauagcacc  | 0 | 642 | 642 | 8  | 6 | 3 | 7  | 245 | 232 | 165 |
| scaffold31450_235091   | 24 | uggacugcaauaagaacuuugcac  | 0 | 640 | 640 | 7  | 5 | 5 | 7  | 217 | 238 | 185 |
| scaffold326093_2329970 | 24 | aaaugcauuuagcacccucuggac  | 0 | 635 | 594 | 6  | 7 | 4 | 7  | 221 | 167 | 206 |
| scaffold373877_2681199 | 24 | ccuuaggaccgaguaagcuguacu  | 0 | 624 | 617 | 6  | 6 | 6 | 6  | 238 | 117 | 262 |
| C16258231_4631289      | 24 | gaauguacaacucacuaaugcacc  | 0 | 624 | 624 | 5  | 7 | 3 | 9  | 192 | 231 | 201 |
| C14926744_4178158      | 24 | auuucacugcaauaagaacuuugc  | 0 | 619 | 603 | 9  | 5 | 3 | 7  | 311 | 123 | 169 |
| C13350022_3773147      | 24 | agaaggaaccgcaaugaauaucu   | 0 | 618 | 615 | 4  | 4 | 5 | 11 | 255 | 126 | 234 |
| scaffold271000_1938040 | 24 | gaauguguuguaguacucgccu    | 0 | 617 | 615 | 8  | 4 | 6 | 6  | 130 | 161 | 324 |
| scaffold163400_1171553 | 24 | gaauguguuguaguacucgccu    | 0 | 617 | 615 | 8  | 4 | 6 | 6  | 130 | 161 | 324 |
| scaffold202993_1451959 | 24 | guuuucggauugacuuuacaccc   | 0 | 617 | 616 | 9  | 6 | 4 | 5  | 218 | 158 | 240 |
| C14195721_3985002      | 24 | aaaugcauuuagcacccucuggac  | 0 | 617 | 617 | 6  | 7 | 4 | 7  | 228 | 178 | 211 |

|                        |    |                           |   |     |     |    |   |   |    |     |     |     |
|------------------------|----|---------------------------|---|-----|-----|----|---|---|----|-----|-----|-----|
| scaffold19519_146486   | 24 | guuuucggauugacuuuaacacc   | 0 | 616 | 616 | 9  | 6 | 4 | 5  | 218 | 158 | 240 |
| scaffold73235_534636   | 24 | guuuucggauugacuuuaacacc   | 0 | 613 | 610 | 9  | 6 | 4 | 5  | 215 | 157 | 238 |
| scaffold176545_1262344 | 24 | aaaugcauuuagcaccucuggac   | 0 | 612 | 612 | 6  | 7 | 4 | 7  | 227 | 169 | 216 |
| scaffold50249_371375   | 24 | ugcauuuagcaccuccuggacagc  | 0 | 611 | 508 | 5  | 9 | 5 | 5  | 129 | 189 | 190 |
| scaffold190286_1358858 | 24 | aaucagacucgagcuuugcgagc   | 0 | 610 | 609 | 5  | 6 | 6 | 7  | 233 | 164 | 212 |
| scaffold156250_1122030 | 24 | auuuagcaccuccuggacagcaac  | 0 | 609 | 598 | 4  | 9 | 4 | 7  | 158 | 238 | 202 |
| scaffold6761_50786     | 24 | auuucacugcaauaugaacuugc   | 0 | 608 | 574 | 9  | 5 | 3 | 7  | 305 | 112 | 157 |
| scaffold369633_2650611 | 21 | uucccgguugaauuuuuugau     | 0 | 606 | 598 | 11 | 3 | 4 | 3  | 147 | 286 | 165 |
| C14926744_4178157      | 24 | auuucacugcaauaugaacuugc   | 0 | 605 | 603 | 9  | 5 | 3 | 7  | 311 | 123 | 169 |
| scaffold1191_8969      | 24 | gaauguguuuaagugacucgccu   | 0 | 604 | 544 | 8  | 4 | 7 | 5  | 142 | 188 | 214 |
| scaffold391416_2818375 | 24 | ggaauuucacucggauugagagc   | 0 | 602 | 585 | 7  | 4 | 7 | 6  | 234 | 174 | 177 |
| scaffold89036_647398   | 23 | aaauauggacugcaauaugaacu   | 0 | 600 | 599 | 6  | 3 | 4 | 10 | 235 | 102 | 262 |
| C13213957_3739315      | 24 | uuuugacaacgccggguucgacc   | 0 | 599 | 598 | 6  | 7 | 7 | 4  | 239 | 156 | 203 |
| scaffold272711_1951133 | 21 | uucccgguugaauuuuuugau     | 0 | 598 | 562 | 11 | 3 | 4 | 3  | 129 | 275 | 158 |
| C16873363_4941452      | 24 | aacaccggauaugauuaauaauc   | 0 | 598 | 597 | 7  | 4 | 3 | 10 | 247 | 113 | 237 |
| scaffold337732_2412242 | 22 | uuuucaaucacguaguuaacc     | 0 | 594 | 594 | 8  | 6 | 2 | 6  | 258 | 304 | 32  |
| scaffold114807_830661  | 24 | ggacuacaauaugaacuugcacc   | 0 | 591 | 555 | 6  | 6 | 4 | 8  | 161 | 254 | 140 |
| scaffold96013_697707   | 24 | ggacuacaauaugaacuugcacc   | 0 | 591 | 555 | 6  | 6 | 4 | 8  | 161 | 254 | 140 |
| C17041073_5050608      | 25 | ucccugugaugaucuaaaucugacc | 0 | 590 | 564 | 8  | 7 | 4 | 6  | 36  | 42  | 486 |
| C14241673_3996554      | 21 | augaacuugguuauggcacc      | 0 | 588 | 587 | 7  | 4 | 5 | 5  | 246 | 337 | 4   |
| scaffold134341_967754  | 24 | ugcacccaauccgaucacuguu    | 0 | 581 | 574 | 6  | 9 | 4 | 5  | 126 | 197 | 251 |
| scaffold159324_1142628 | 24 | acagugauugagaacaguaccacc  | 0 | 579 | 543 | 5  | 6 | 5 | 8  | 311 | 111 | 121 |
| scaffold130806_945225  | 24 | gcuaccagagcggacaauaucgu   | 0 | 579 | 576 | 4  | 7 | 6 | 7  | 188 | 163 | 225 |
| scaffold6761_50785     | 24 | auuucacugcaauaugaacuugc   | 0 | 576 | 574 | 9  | 5 | 3 | 7  | 305 | 112 | 157 |
| scaffold418370_3048484 | 24 | auuucggccugauuugcacc      | 0 | 576 | 575 | 8  | 8 | 5 | 3  | 231 | 187 | 157 |
| C13683929_3859400      | 24 | auuucggccugauuugcacc      | 0 | 576 | 575 | 8  | 8 | 5 | 3  | 231 | 187 | 157 |



|                        |    |                          |   |     |     |    |   |   |    |     |     |     |
|------------------------|----|--------------------------|---|-----|-----|----|---|---|----|-----|-----|-----|
| scaffold429701_3158388 | 24 | aaccgcuaacucgaaaugacc    | 0 | 574 | 407 | 4  | 9 | 3 | 8  | 155 | 130 | 122 |
| scaffold453713_3464767 | 24 | auccgagaccuugcagaaccugac | 0 | 572 | 571 | 4  | 8 | 5 | 7  | 206 | 145 | 220 |
| scaffold72744_534122   | 24 | uauggacugcaauaugaacuuugc | 0 | 571 | 570 | 8  | 4 | 5 | 7  | 182 | 181 | 207 |
| scaffold127442_918700  | 24 | aaccgcuaacucgaaaugacc    | 0 | 569 | 461 | 4  | 9 | 3 | 8  | 164 | 146 | 151 |
| C14613324_4091946      | 23 | auuccaugcuugcaaucaaacgc  | 0 | 563 | 563 | 6  | 7 | 3 | 7  | 176 | 159 | 228 |
| scaffold184484_1317894 | 24 | ggacuacaauaugaacuuugcacc | 0 | 555 | 555 | 6  | 6 | 4 | 8  | 161 | 254 | 140 |
| scaffold79937_582248   | 24 | ggacuacaauaugaacuuugcacc | 0 | 554 | 554 | 6  | 6 | 4 | 8  | 160 | 254 | 140 |
| scaffold66743_496565   | 24 | ggacuacaauaugaacuuugcacc | 0 | 551 | 551 | 6  | 6 | 4 | 8  | 160 | 250 | 141 |
| scaffold99716_723391   | 24 | aaaugcauuuagcacuacuuggac | 0 | 548 | 543 | 7  | 5 | 4 | 8  | 246 | 105 | 192 |
| scaffold81703_597576   | 24 | aaaugcauuuagcacuacuuggac | 0 | 545 | 543 | 7  | 5 | 4 | 8  | 246 | 105 | 192 |
| scaffold176685_1262736 | 22 | aaccaugauccaguucaagaac   | 0 | 543 | 419 | 4  | 6 | 3 | 9  | 149 | 200 | 70  |
| scaffold323962_2314400 | 21 | ugacggcguuagaggcucgac    | 0 | 543 | 543 | 4  | 5 | 8 | 4  | 340 | 160 | 43  |
| scaffold421979_3082390 | 24 | uuucaauccuguaguuaaccacu  | 0 | 538 | 480 | 9  | 7 | 2 | 6  | 145 | 79  | 256 |
| scaffold437634_3245355 | 24 | gccgcgaaacgucuuaaagagac  | 0 | 533 | 533 | 3  | 6 | 7 | 8  | 224 | 160 | 149 |
| scaffold421018_3073347 | 24 | auguacaacucauuuaugcacc   | 0 | 528 | 521 | 7  | 7 | 2 | 8  | 270 | 112 | 139 |
| scaffold209982_1503419 | 24 | accuuacuucgguugucaaggacc | 0 | 527 | 456 | 7  | 7 | 5 | 5  | 268 | 118 | 70  |
| C16709542_4847095      | 24 | auuucggcuugauuugcacc     | 0 | 520 | 518 | 8  | 8 | 5 | 3  | 219 | 162 | 137 |
| C14261661_4001383      | 24 | auuaugcgccgaaauauugagc   | 0 | 519 | 517 | 7  | 5 | 5 | 7  | 299 | 115 | 103 |
| scaffold54797_403823   | 24 | uuuucgaaauucugacaacacc   | 0 | 518 | 507 | 8  | 8 | 2 | 6  | 231 | 200 | 76  |
| C16759248_4873951      | 22 | ucaccgugccguaacucuuc     | 0 | 516 | 501 | 7  | 9 | 3 | 3  | 196 | 203 | 102 |
| scaffold103674_750538  | 24 | uuuuucgguccgugauuugcacc  | 0 | 511 | 510 | 10 | 6 | 5 | 3  | 177 | 187 | 146 |
| scaffold29706_222616   | 24 | cccuuaaggaccgaguauugcacc | 0 | 506 | 460 | 5  | 7 | 6 | 6  | 212 | 149 | 99  |
| scaffold186336_1331009 | 24 | aaccgcuaacucgaaaugacc    | 0 | 506 | 468 | 4  | 9 | 3 | 8  | 165 | 150 | 153 |
| scaffold261729_1871037 | 24 | cccuuaaggaccgaguauugcacc | 0 | 505 | 459 | 5  | 7 | 6 | 6  | 211 | 149 | 99  |
| scaffold6761_50834     | 23 | aaauauguacugcaauaugaacu  | 0 | 502 | 419 | 7  | 3 | 3 | 10 | 166 | 71  | 182 |
| scaffold427810_3138727 | 24 | cccuuaaggaccgaguauugcacc | 0 | 498 | 460 | 5  | 7 | 6 | 6  | 212 | 149 | 99  |

|                        |    |                           |   |     |     |   |   |   |   |     |     |     |
|------------------------|----|---------------------------|---|-----|-----|---|---|---|---|-----|-----|-----|
| C13116659_3715346      | 24 | aauaaaugguccucuuuagaucuu  | 0 | 497 | 485 | 9 | 5 | 3 | 7 | 206 | 102 | 177 |
| scaffold70604_515995   | 24 | acgagaccagaauugcguggggcc  | 0 | 490 | 406 | 3 | 6 | 9 | 6 | 140 | 98  | 168 |
| scaffold286814_2050592 | 24 | cgacugauggccagaaauagcc    | 0 | 490 | 488 | 4 | 7 | 6 | 7 | 266 | 133 | 89  |
| C14709784_4117715      | 24 | aauaaaugguccucuuuagaucuu  | 0 | 485 | 485 | 9 | 5 | 3 | 7 | 206 | 102 | 177 |
| scaffold383959_2759078 | 24 | agggauuuuggacuuugcacccc   | 0 | 483 | 482 | 7 | 6 | 6 | 5 | 198 | 143 | 141 |
| scaffold206000_1497152 | 24 | uuuagcaccuucugaacaacaacc  | 0 | 479 | 469 | 6 | 8 | 2 | 8 | 111 | 267 | 91  |
| scaffold153040_1098420 | 23 | aucauuggagcggguguagcguc   | 0 | 476 | 466 | 6 | 4 | 9 | 4 | 225 | 128 | 113 |
| C13373834_3779112      | 23 | aucauuggagcggguguagcguc   | 0 | 476 | 466 | 6 | 4 | 9 | 4 | 225 | 128 | 113 |
| C12977227_3681035      | 24 | uugggauugggaauuucuaucacc  | 0 | 475 | 472 | 9 | 4 | 6 | 5 | 204 | 143 | 125 |
| scaffold267860_1915350 | 24 | cccuuaaggaccgaguauugcac   | 0 | 474 | 460 | 5 | 7 | 6 | 6 | 212 | 149 | 99  |
| scaffold120255_868722  | 24 | uuuucgaauuucugacaacacccc  | 0 | 474 | 473 | 8 | 8 | 2 | 6 | 217 | 189 | 67  |
| C15464919_4339213      | 24 | gcgugucugaccgaaaugaccc    | 0 | 470 | 462 | 5 | 8 | 6 | 5 | 182 | 136 | 144 |
| scaffold112755_816352  | 24 | uauggacugcaauaugaacuuugc  | 0 | 469 | 460 | 8 | 4 | 5 | 7 | 157 | 149 | 154 |
| C12651451_3601909      | 24 | agaauacaaguugacauuuucucu  | 0 | 468 | 467 | 9 | 4 | 3 | 8 | 161 | 94  | 212 |
| scaffold315742_2255371 | 24 | aaccgcuaacucgaaaugaccc    | 0 | 466 | 465 | 4 | 9 | 3 | 8 | 164 | 148 | 153 |
| scaffold273286_1955087 | 24 | uuucaauccuguaguuacccacu   | 0 | 465 | 465 | 9 | 7 | 2 | 6 | 135 | 75  | 255 |
| scaffold165614_1186727 | 19 | auaccguuggucucuuagg       | 0 | 464 | 458 | 7 | 4 | 5 | 3 | 162 | 142 | 154 |
| scaffold366756_2628653 | 24 | uuucaauccuguaguuacccacu   | 0 | 464 | 464 | 9 | 7 | 2 | 6 | 136 | 75  | 253 |
| C16520976_4750491      | 22 | cugcgaaugcaagaaauuccu     | 0 | 459 | 198 | 7 | 5 | 4 | 6 | 129 | 68  | 1   |
| scaffold74436_543251   | 24 | agagugaucacuugggccuggcuc  | 0 | 454 | 453 | 6 | 6 | 8 | 4 | 208 | 140 | 105 |
| scaffold15475_116633   | 24 | agagugaucacuugggccuggcuc  | 0 | 453 | 453 | 6 | 6 | 8 | 4 | 208 | 140 | 105 |
| scaffold432164_3183921 | 24 | cuacugaauuccaagguuauagacu | 0 | 451 | 449 | 8 | 5 | 4 | 7 | 96  | 176 | 177 |
| scaffold92040_669986   | 24 | aaaugcauuagcaccuccuggac   | 0 | 450 | 364 | 5 | 8 | 4 | 7 | 112 | 124 | 128 |
| C12963361_3677800      | 22 | agccaugaucuuuucagaac      | 0 | 447 | 288 | 4 | 6 | 3 | 9 | 83  | 151 | 54  |
| C15900315_4488859      | 24 | ggaccgagugacuugugcuuuacu  | 0 | 447 | 341 | 8 | 5 | 7 | 4 | 77  | 89  | 175 |
| scaffold242106_1730791 | 24 | aaauccgugaaccaaagaggecu   | 0 | 443 | 300 | 3 | 7 | 5 | 9 | 90  | 85  | 125 |

|                        |    |                           |   |     |     |   |   |   |    |     |     |     |
|------------------------|----|---------------------------|---|-----|-----|---|---|---|----|-----|-----|-----|
| scaffold457842_3551194 | 24 | auuuucggauuagccuuaacacc   | 0 | 443 | 442 | 8 | 7 | 3 | 6  | 227 | 113 | 102 |
| scaffold87971_639700   | 24 | uauggacugcaauaugaacuugc   | 0 | 443 | 442 | 8 | 4 | 5 | 7  | 150 | 146 | 146 |
| scaffold232975_1666289 | 21 | uggaagucguauugucacacc     | 0 | 438 | 415 | 6 | 5 | 5 | 5  | 41  | 22  | 352 |
| scaffold10480_78311    | 24 | aaaugcauuuagcaccuucuggac  | 0 | 432 | 391 | 7 | 6 | 4 | 7  | 129 | 108 | 154 |
| C14422768_4041953      | 24 | aacaccggauaggauuaauuauc   | 0 | 429 | 426 | 6 | 4 | 4 | 10 | 168 | 104 | 154 |
| scaffold187734_1341199 | 23 | uaaaugcauuuagcaccuucuga   | 0 | 426 | 156 | 8 | 5 | 3 | 7  | 50  | 32  | 74  |
| C13521802_3817076      | 24 | uauggacugcaauaugaacuugc   | 0 | 425 | 418 | 8 | 4 | 5 | 7  | 142 | 135 | 141 |
| scaffold231492_1656490 | 22 | aaccaugauccaguucaagaac    | 0 | 424 | 419 | 4 | 6 | 3 | 9  | 149 | 200 | 70  |
| C15358003_4305490      | 24 | accuggacagcaaccagaaggugc  | 0 | 420 | 360 | 2 | 7 | 7 | 8  | 162 | 123 | 75  |
| C13952741_3926580      | 24 | aaaugcauuuagcaccuucuggac  | 0 | 419 | 412 | 7 | 6 | 4 | 7  | 139 | 114 | 159 |
| scaffold135575_977013  | 19 | cccgaagaucaacaucuug       | 0 | 415 | 412 | 4 | 6 | 3 | 6  | 128 | 139 | 145 |
| scaffold301194_2152709 | 24 | aaaugcauuuagcaccuucuggac  | 0 | 414 | 412 | 7 | 6 | 4 | 7  | 139 | 114 | 159 |
| scaffold301194_2152710 | 24 | aaaugcauuuagcaccuucuggac  | 0 | 414 | 412 | 7 | 6 | 4 | 7  | 139 | 114 | 159 |
| scaffold121722_879111  | 24 | cuccacuuuuguccuaaggcacuc  | 0 | 413 | 412 | 8 | 9 | 3 | 4  | 85  | 136 | 191 |
| scaffold121722_879112  | 24 | cuccacuuuuguccuaaggcacuc  | 0 | 413 | 412 | 8 | 9 | 3 | 4  | 85  | 136 | 191 |
| scaffold97004_704551   | 24 | gggugauuggaccacuuggaacc   | 0 | 413 | 413 | 5 | 6 | 8 | 5  | 125 | 123 | 165 |
| scaffold389349_2801093 | 23 | cggcaccgaguccuguguaacc    | 0 | 412 | 408 | 4 | 8 | 6 | 5  | 96  | 121 | 191 |
| C15554691_4368824      | 24 | uauggacugcaauaugaacuugc   | 0 | 411 | 406 | 8 | 4 | 5 | 7  | 136 | 137 | 133 |
| scaffold198528_1418733 | 24 | cccuuaaggaccgaguauugcac   | 0 | 409 | 406 | 5 | 7 | 6 | 6  | 183 | 138 | 85  |
| scaffold72079_531277   | 24 | aaaugcauuuagcaccuucugaac  | 0 | 407 | 363 | 7 | 6 | 3 | 8  | 149 | 88  | 126 |
| scaffold243407_1740375 | 18 | ccuuacaugguuguggcc        | 0 | 405 | 405 | 6 | 5 | 5 | 2  | 329 | 4   | 72  |
| scaffold326288_2331365 | 24 | cgacugauggcccagaaacuagcc  | 0 | 404 | 387 | 3 | 8 | 6 | 7  | 165 | 135 | 87  |
| C17083882_5083723      | 24 | aaaugcauuuagcaccaccuggac  | 0 | 403 | 388 | 5 | 7 | 4 | 8  | 123 | 128 | 137 |
| C13288591_3758298      | 24 | aaaugcauuuagcaccuccuggac  | 0 | 401 | 367 | 5 | 8 | 4 | 7  | 112 | 130 | 125 |
| C13990977_3935378      | 24 | aaccgaguugcaggcuuguacacu  | 0 | 400 | 380 | 6 | 6 | 6 | 6  | 107 | 85  | 188 |
| C14394149_4034732      | 24 | auuucauacucggauugagagcagc | 0 | 400 | 397 | 7 | 5 | 6 | 6  | 185 | 102 | 110 |

|                        |    |                          |   |     |     |   |    |   |   |     |     |     |
|------------------------|----|--------------------------|---|-----|-----|---|----|---|---|-----|-----|-----|
| C16719948_4852345      | 21 | cuucuugcaauaucguugau     | 0 | 397 | 360 | 9 | 5  | 3 | 4 | 94  | 78  | 188 |
| C15283057_4281744      | 24 | aaaugcauuuagcaccuccuggac | 0 | 397 | 391 | 5 | 8  | 4 | 7 | 122 | 134 | 135 |
| scaffold198450_1421804 | 24 | ucguagaucagcgaaugugucgc  | 0 | 396 | 395 | 6 | 5  | 7 | 6 | 174 | 103 | 118 |
| scaffold167988_1202875 | 24 | ggaccgagugacuugugcuuuacu | 0 | 394 | 355 | 8 | 5  | 7 | 4 | 82  | 93  | 180 |
| scaffold8429_63186     | 24 | aaaugcauuuagcaccuccuggac | 0 | 394 | 388 | 5 | 7  | 4 | 8 | 123 | 128 | 137 |
| scaffold3635_28419     | 24 | aaaugcauuuagcaccuccuggac | 0 | 392 | 391 | 5 | 8  | 4 | 7 | 122 | 134 | 135 |
| C13818405_3894486      | 24 | uccauuuucacugcaaugugaac  | 0 | 391 | 323 | 8 | 6  | 3 | 7 | 112 | 92  | 119 |
| scaffold115744_838080  | 24 | acaauaucguacugagguggacc  | 0 | 390 | 365 | 5 | 5  | 7 | 7 | 180 | 69  | 116 |
| scaffold63276_464815   | 24 | aaaugcauuuagcaccuccuggac | 0 | 388 | 388 | 5 | 7  | 4 | 8 | 123 | 128 | 137 |
| scaffold436609_3230609 | 21 | agcugcugauuuauuggauccc   | 0 | 387 | 285 | 6 | 5  | 5 | 5 | 154 | 43  | 88  |
| scaffold11274_84340    | 24 | cgacugauggccagaaacuagcc  | 0 | 387 | 385 | 3 | 8  | 6 | 7 | 164 | 135 | 86  |
| C14244407_3997200      | 22 | cccaaaauucguuacuugcauc   | 0 | 386 | 353 | 7 | 7  | 2 | 6 | 59  | 221 | 73  |
| scaffold8646_64895     | 24 | agccuugcucagucgacugauggc | 0 | 386 | 386 | 6 | 7  | 7 | 4 | 150 | 116 | 120 |
| C12552251_3577916      | 22 | auggccacucagucgacugaug   | 0 | 384 | 283 | 5 | 6  | 6 | 5 | 98  | 83  | 102 |
| scaffold20715_155470   | 24 | ccagagugaucucuagggccuggc | 0 | 383 | 335 | 5 | 7  | 8 | 4 | 176 | 107 | 52  |
| scaffold358913_2569554 | 24 | aaaugcauuuagcaccuccuggac | 0 | 380 | 379 | 5 | 7  | 4 | 8 | 120 | 127 | 132 |
| scaffold220336_1575261 | 24 | gauagucgcaagcccacuuggccc | 0 | 377 | 370 | 4 | 9  | 6 | 5 | 109 | 91  | 170 |
| scaffold260095_1860101 | 24 | aaaugcauuuagcacuccuuggac | 0 | 373 | 364 | 7 | 6  | 4 | 7 | 183 | 105 | 76  |
| scaffold183062_1307400 | 24 | acaauaucguacugagguggacc  | 0 | 373 | 367 | 5 | 5  | 7 | 7 | 180 | 68  | 119 |
| scaffold387170_2783994 | 24 | aaaugcauuuagcaccuccuggac | 0 | 373 | 371 | 6 | 7  | 4 | 7 | 138 | 88  | 145 |
| scaffold387170_2783993 | 24 | aaaugcauuuagcaccuccuggac | 0 | 371 | 371 | 6 | 7  | 4 | 7 | 138 | 88  | 145 |
| scaffold214780_1536086 | 24 | auuucaucucgguugagagcagc  | 0 | 370 | 366 | 7 | 5  | 6 | 6 | 165 | 97  | 104 |
| scaffold231382_1656356 | 24 | cuucaucagcaccgugcuugcgcc | 0 | 369 | 297 | 6 | 10 | 5 | 3 | 90  | 107 | 100 |
| scaffold397912_2872052 | 24 | acaauaucguacugagguggacc  | 0 | 367 | 367 | 5 | 5  | 7 | 7 | 180 | 68  | 119 |
| scaffold39031_290663   | 24 | acaauaucguacugagguggacc  | 0 | 367 | 367 | 5 | 5  | 7 | 7 | 180 | 68  | 119 |
| C13000800_3687055      | 23 | uaaaugcauuuagcaccuccugg  | 0 | 366 | 296 | 7 | 6  | 4 | 6 | 77  | 99  | 120 |

|                        |    |                          |   |     |     |   |    |   |   |     |     |     |
|------------------------|----|--------------------------|---|-----|-----|---|----|---|---|-----|-----|-----|
| C13716951_3868172      | 24 | aaaugcauuuagcaccuccuggac | 0 | 366 | 361 | 5 | 8  | 4 | 7 | 112 | 124 | 125 |
| scaffold269265_1925467 | 22 | auaugcagagaguauggcacuc   | 0 | 366 | 366 | 5 | 4  | 6 | 7 | 218 | 148 | 0   |
| scaffold373089_2675386 | 22 | auaugcagagaguauggcacuc   | 0 | 366 | 366 | 5 | 4  | 6 | 7 | 218 | 148 | 0   |
| C13818917_3894674      | 24 | aaaugcauuuagcaccuucugaac | 0 | 364 | 361 | 7 | 6  | 3 | 8 | 149 | 86  | 126 |
| scaffold113357_821191  | 24 | aaaugcauuuagcaccuccuggac | 0 | 364 | 364 | 5 | 8  | 4 | 7 | 112 | 124 | 128 |
| scaffold113357_821189  | 24 | aaaugcauuuagcaccuccuggac | 0 | 364 | 364 | 5 | 8  | 4 | 7 | 112 | 124 | 128 |
| scaffold181425_1296373 | 24 | agaagaacaacacuuguugagugu | 0 | 362 | 361 | 6 | 3  | 6 | 9 | 112 | 73  | 176 |
| scaffold160844_1153152 | 24 | ggaccgagugacuuguguuuuacu | 0 | 361 | 324 | 9 | 4  | 7 | 4 | 71  | 58  | 195 |
| scaffold155379_1115203 | 24 | acaauaucguacugagguggacc  | 0 | 361 | 350 | 5 | 5  | 7 | 7 | 170 | 67  | 113 |
| scaffold23746_178020   | 24 | uggacugcaauaugaacuucac   | 0 | 361 | 359 | 7 | 5  | 5 | 7 | 114 | 146 | 99  |
| C14505478_4063357      | 24 | ggaccgagugacuugugcuuuacu | 0 | 360 | 355 | 8 | 5  | 7 | 4 | 83  | 93  | 179 |
| scaffold3916_30297     | 24 | ggacugcaauaugaacuucacc   | 0 | 357 | 357 | 6 | 6  | 5 | 7 | 130 | 118 | 109 |
| scaffold3916_30298     | 24 | ggacugcaauaugaacuucacc   | 0 | 357 | 357 | 6 | 6  | 5 | 7 | 130 | 118 | 109 |
| C13843041_3900638      | 24 | uucacauugcagugaaauaggac  | 0 | 352 | 322 | 7 | 4  | 5 | 8 | 205 | 30  | 87  |
| C13098542_3711115      | 24 | uccauuuucacugcaaugugaac  | 0 | 351 | 325 | 8 | 6  | 3 | 7 | 112 | 92  | 121 |
| C15276277_4280241      | 24 | uguagacacccgauccgugacc   | 0 | 349 | 348 | 4 | 10 | 5 | 5 | 80  | 167 | 101 |
| scaffold387170_2783996 | 23 | uaaaugcauuuagcaccuucugg  | 0 | 348 | 260 | 8 | 5  | 4 | 6 | 91  | 59  | 110 |
| scaffold47697_352119   | 24 | aaaugcauuuagcaccuucugaac | 0 | 344 | 309 | 7 | 6  | 3 | 8 | 141 | 59  | 109 |
| scaffold26749_200606   | 24 | gguaccaaggcuugaaccuuggac | 0 | 343 | 342 | 5 | 6  | 7 | 6 | 166 | 103 | 73  |
| scaffold395578_2852327 | 24 | guucauuucggcaaugaccacc   | 0 | 343 | 342 | 6 | 7  | 5 | 6 | 119 | 111 | 112 |
| scaffold190963_1363945 | 24 | ggaccgagugacuuguguuuuacu | 0 | 341 | 329 | 9 | 4  | 7 | 4 | 72  | 61  | 196 |
| scaffold176264_1260175 | 24 | ggaccgagugacuuguguuuuacu | 0 | 340 | 329 | 9 | 4  | 7 | 4 | 72  | 61  | 196 |
| scaffold135567_976923  | 21 | cagagaagccucugaucgauc    | 0 | 338 | 335 | 4 | 6  | 5 | 6 | 121 | 46  | 168 |
| scaffold154508_1108913 | 24 | aaaugcauuuagcaccaccuggac | 0 | 336 | 296 | 5 | 7  | 4 | 8 | 98  | 94  | 104 |
| scaffold302478_2162014 | 24 | uuuugcgucguaaaacacacccc  | 0 | 335 | 334 | 6 | 8  | 3 | 7 | 128 | 103 | 103 |
| C13553816_3825829      | 24 | uguagacacccgauccgugacc   | 0 | 333 | 333 | 4 | 10 | 5 | 5 | 69  | 153 | 111 |

|                        |    |                          |   |     |     |   |   |   |    |     |     |     |
|------------------------|----|--------------------------|---|-----|-----|---|---|---|----|-----|-----|-----|
| scaffold259763_1857149 | 24 | gaagaaugaacacauaauacacc  | 0 | 332 | 302 | 4 | 6 | 3 | 11 | 170 | 40  | 92  |
| scaffold237533_1701461 | 23 | uaaaugcauuagcaccucugg    | 0 | 331 | 296 | 7 | 6 | 4 | 6  | 77  | 99  | 120 |
| scaffold306821_2190989 | 21 | cgaaagcuggccccggacacc    | 0 | 331 | 330 | 1 | 9 | 6 | 5  | 90  | 117 | 123 |
| C13051870_3699435      | 24 | uccauuuucacugcaaugugaac  | 0 | 330 | 325 | 8 | 6 | 3 | 7  | 112 | 92  | 121 |
| C13823031_3895766      | 24 | aaaugcauuagcaccuccuggac  | 0 | 330 | 326 | 5 | 8 | 4 | 7  | 101 | 111 | 114 |
| C13664431_3854523      | 24 | uaauggaucgaagauacuuaaacc | 0 | 329 | 308 | 6 | 5 | 3 | 10 | 152 | 121 | 35  |
| scaffold397605_2869078 | 24 | augggauuuuggacuuugcacc   | 0 | 329 | 317 | 8 | 5 | 6 | 5  | 142 | 108 | 67  |
| scaffold133569_963467  | 23 | uuucacugcaauaugaacuugc   | 0 | 329 | 329 | 9 | 5 | 3 | 6  | 138 | 86  | 105 |
| scaffold334852_2392950 | 24 | aaaugcauuagcaccuucugaac  | 0 | 326 | 322 | 7 | 6 | 3 | 8  | 142 | 62  | 118 |
| scaffold173094_1238533 | 23 | uaaaugcauuagcaccuucugg   | 0 | 323 | 258 | 8 | 5 | 4 | 6  | 91  | 58  | 109 |
| scaffold21409_160147   | 24 | aaaugcauuagcaccuucugaac  | 0 | 323 | 322 | 7 | 6 | 3 | 8  | 142 | 62  | 118 |
| C13485336_3807808      | 24 | aaaugcauuagcaccuucugaac  | 0 | 323 | 322 | 7 | 6 | 3 | 8  | 142 | 62  | 118 |
| scaffold281240_2011420 | 22 | uuucaaucauguaguuaacc     | 0 | 321 | 305 | 9 | 5 | 2 | 6  | 100 | 94  | 111 |
| scaffold364066_2610718 | 24 | aaaugcauuagcaccuucuggac  | 0 | 319 | 314 | 7 | 6 | 4 | 7  | 110 | 76  | 128 |
| scaffold167099_1196564 | 22 | uuuggcacaguuuugaucuaac   | 0 | 316 | 271 | 9 | 4 | 4 | 5  | 162 | 96  | 13  |
| scaffold16592_126348   | 23 | uaaaugcauuagcaccucugg    | 0 | 316 | 296 | 7 | 6 | 4 | 6  | 77  | 99  | 120 |
| scaffold403164_2921148 | 24 | auaaguuccaggcaauugaauugc | 0 | 315 | 313 | 7 | 4 | 5 | 8  | 96  | 64  | 153 |
| C13572739_3830478      | 24 | ccagagugaucucuaggccuggc  | 0 | 315 | 315 | 5 | 7 | 8 | 4  | 165 | 96  | 54  |
| scaffold97853_710379   | 22 | auggccacucagucgacugaug   | 0 | 314 | 310 | 5 | 6 | 6 | 5  | 105 | 94  | 111 |
| scaffold142181_1022500 | 24 | aaaugcauuagcaccuucuggac  | 0 | 314 | 312 | 7 | 6 | 4 | 7  | 111 | 75  | 126 |
| scaffold89048_647471   | 24 | aaaugcauuagcaccaccuggac  | 0 | 312 | 305 | 5 | 7 | 4 | 8  | 98  | 97  | 110 |
| scaffold221131_1581473 | 24 | aaaugcauuagcaccaccuggac  | 0 | 312 | 306 | 5 | 7 | 4 | 8  | 102 | 98  | 106 |
| C14848558_4155676      | 24 | guggcacuguucacucagggcauc | 0 | 312 | 311 | 6 | 8 | 6 | 4  | 101 | 147 | 63  |
| scaffold328511_2346975 | 24 | guacaacucauuagcacucggu   | 0 | 310 | 309 | 7 | 6 | 4 | 7  | 208 | 68  | 33  |
| scaffold182197_1301010 | 22 | auggccacucagucgacugaug   | 0 | 310 | 310 | 5 | 6 | 6 | 5  | 105 | 94  | 111 |
| C12575257_3583511      | 24 | caccuuggaugaguuuuauacac  | 0 | 309 | 300 | 8 | 6 | 4 | 6  | 111 | 113 | 76  |

|                        |    |                           |   |     |     |   |    |   |    |     |     |     |
|------------------------|----|---------------------------|---|-----|-----|---|----|---|----|-----|-----|-----|
| scaffold10667_79675    | 23 | uaaaugcauuuagcaccucugg    | 0 | 308 | 237 | 7 | 6  | 4 | 6  | 56  | 76  | 105 |
| scaffold289035_2066578 | 23 | uaaaugcauuuagcaccuucugg   | 0 | 308 | 257 | 8 | 5  | 4 | 6  | 90  | 58  | 109 |
| scaffold288980_2066162 | 21 | aaaccaucuucuuuuuucugc     | 0 | 305 | 254 | 9 | 6  | 1 | 5  | 52  | 67  | 135 |
| C15598205_4382814      | 24 | aaaauucugugaaccaaagaggcc  | 0 | 304 | 240 | 3 | 6  | 5 | 10 | 89  | 58  | 93  |
| scaffold19445_145867   | 24 | gaaauacuccaguacacucugcac  | 0 | 304 | 302 | 5 | 8  | 3 | 8  | 139 | 79  | 84  |
| scaffold253650_1813542 | 24 | accuucauucgguugagagcagcc  | 0 | 302 | 268 | 6 | 7  | 6 | 5  | 126 | 66  | 76  |
| scaffold394958_2847201 | 24 | uccaagaggggaaacuguaacucu  | 0 | 302 | 285 | 5 | 5  | 6 | 8  | 69  | 60  | 156 |
| scaffold180446_1289083 | 23 | uaaaugcauuuagcaccucugg    | 0 | 302 | 294 | 7 | 6  | 4 | 6  | 77  | 98  | 119 |
| scaffold10667_79676    | 23 | uaaaugcauuuagcaccucugg    | 0 | 301 | 295 | 7 | 6  | 4 | 6  | 76  | 99  | 120 |
| scaffold24976_186559   | 22 | ugagucauucaugucgacc       | 0 | 299 | 298 | 7 | 6  | 4 | 5  | 106 | 139 | 53  |
| C12725669_3619994      | 23 | uaaaugcauuuagcaccuucugg   | 0 | 298 | 258 | 8 | 5  | 4 | 6  | 91  | 58  | 109 |
| C15955755_4510346      | 23 | uaaaugcauuuagcaccucugg    | 0 | 298 | 296 | 7 | 6  | 4 | 6  | 77  | 99  | 120 |
| scaffold1136_22107     | 23 | uaaaugcauuuagcaccucugg    | 0 | 297 | 296 | 7 | 6  | 4 | 6  | 77  | 99  | 120 |
| scaffold319084_2279883 | 23 | uaaaugcauuuagcaccucugg    | 0 | 297 | 296 | 7 | 6  | 4 | 6  | 77  | 99  | 120 |
| scaffold295285_2109278 | 24 | uuugacuguguggucuaaaaauacc | 0 | 296 | 291 | 9 | 4  | 5 | 6  | 132 | 81  | 78  |
| scaffold441197_3283181 | 18 | agagacuuagaccuccu         | 0 | 296 | 296 | 4 | 6  | 3 | 5  | 61  | 68  | 167 |
| scaffold30427_227924   | 24 | auuuagcaccaccuggacagcaac  | 0 | 296 | 296 | 4 | 8  | 4 | 8  | 91  | 91  | 114 |
| scaffold110137_797720  | 23 | uaaaugcauuuagcaccucugg    | 0 | 296 | 296 | 7 | 6  | 4 | 6  | 77  | 99  | 120 |
| C15615133_4388896      | 23 | uaaaugcauuuagcaccucugg    | 0 | 296 | 296 | 7 | 6  | 4 | 6  | 77  | 99  | 120 |
| scaffold59287_447691   | 23 | uaaaugcauuuagcaccucugg    | 0 | 296 | 296 | 7 | 6  | 4 | 6  | 77  | 99  | 120 |
| scaffold189043_1349795 | 24 | acaauaucguacugaggugggacc  | 0 | 295 | 273 | 5 | 5  | 7 | 7  | 147 | 49  | 77  |
| C17166626_5144317      | 18 | agagacuuagaccuccu         | 0 | 295 | 295 | 4 | 6  | 3 | 5  | 61  | 68  | 166 |
| scaffold152259_1093240 | 24 | caaccagaaggugcuaaaugcauu  | 0 | 294 | 107 | 5 | 5  | 5 | 9  | 38  | 28  | 41  |
| C15363895_4307135      | 25 | ugcuacacuugcuuuuauagacacc | 0 | 291 | 195 | 8 | 8  | 3 | 6  | 127 | 67  | 1   |
| scaffold78978_574801   | 24 | uguagacaccccgauccgugaccc  | 0 | 290 | 290 | 4 | 10 | 5 | 5  | 46  | 149 | 95  |
| C15669275_4407006      | 24 | auccagaagaauuguuacucuuu   | 0 | 289 | 288 | 9 | 4  | 4 | 7  | 87  | 48  | 153 |

|                        |    |                          |   |     |     |    |   |   |    |     |     |     |
|------------------------|----|--------------------------|---|-----|-----|----|---|---|----|-----|-----|-----|
| C16341937_4669536      | 23 | uaaaugcauuuagcaccuucugg  | 0 | 288 | 258 | 8  | 5 | 4 | 6  | 91  | 58  | 109 |
| scaffold281145_2010737 | 24 | aaaugcauuuagcaccaccuggac | 0 | 288 | 282 | 5  | 7 | 4 | 8  | 91  | 92  | 99  |
| scaffold395106_2848419 | 18 | agagacuuagaccuccu        | 0 | 288 | 288 | 4  | 6 | 3 | 5  | 55  | 65  | 168 |
| scaffold174150_1245762 | 24 | guggcacuguucacucacggcauc | 0 | 287 | 268 | 6  | 8 | 6 | 4  | 83  | 133 | 52  |
| scaffold261377_1869062 | 23 | uuucacugcaauaugaacuugc   | 0 | 287 | 287 | 9  | 5 | 3 | 6  | 123 | 73  | 91  |
| scaffold63808_468013   | 24 | aaaugcauuuagcaccaccuggac | 0 | 287 | 287 | 5  | 7 | 4 | 8  | 93  | 95  | 99  |
| scaffold70202_513091   | 23 | uaaaugcauuuagcaccuucugg  | 0 | 286 | 219 | 8  | 5 | 4 | 6  | 74  | 44  | 101 |
| scaffold219201_1566489 | 24 | gcccgucucagucaguugguagag | 0 | 278 | 272 | 6  | 6 | 8 | 4  | 55  | 185 | 32  |
| scaffold7996_60014     | 22 | agaaaauuaguauucugugaccg  | 0 | 278 | 278 | 6  | 3 | 5 | 8  | 137 | 36  | 105 |
| scaffold101770_737860  | 24 | acuaacggucuuacguggcauccc | 0 | 277 | 268 | 6  | 8 | 5 | 5  | 73  | 129 | 66  |
| scaffold2527_23747     | 23 | uaaaugcauuuagcaccuucugg  | 0 | 276 | 195 | 8  | 5 | 4 | 6  | 68  | 36  | 91  |
| scaffold87422_635973   | 24 | agagugaucacuaggccuggcuc  | 0 | 276 | 276 | 5  | 6 | 8 | 5  | 114 | 99  | 63  |
| scaffold87554_637660   | 23 | uaaaugcauuuagcaccuucugg  | 0 | 275 | 256 | 8  | 5 | 4 | 6  | 90  | 58  | 108 |
| scaffold51257_377882   | 24 | aucauaaucacaaagcucagac   | 0 | 273 | 266 | 5  | 6 | 3 | 10 | 163 | 42  | 61  |
| C17042903_5052212      | 24 | ccauuuuuacugcaauugaacu   | 0 | 273 | 268 | 9  | 5 | 3 | 7  | 109 | 57  | 102 |
| C16354869_4673610      | 24 | ggguacugacaauuuuauagcac  | 0 | 273 | 271 | 6  | 4 | 5 | 9  | 122 | 114 | 35  |
| scaffold75577_551138   | 24 | aaaugcauuuagcaccaccuggac | 0 | 273 | 272 | 5  | 7 | 4 | 8  | 87  | 88  | 97  |
| scaffold33341_248930   | 24 | cgcugcgugaaccuuucugggc   | 0 | 272 | 158 | 7  | 7 | 7 | 3  | 64  | 78  | 16  |
| scaffold72815_531514   | 21 | uuuguccacauugauuuau      | 0 | 272 | 175 | 10 | 4 | 3 | 4  | 55  | 32  | 88  |
| scaffold285362_2040065 | 24 | uuacggauugguccuuuuacgac  | 0 | 272 | 263 | 10 | 5 | 5 | 4  | 88  | 102 | 73  |
| C17412470_5357863      | 18 | ccguacauggcuuuggcc       | 0 | 272 | 272 | 5  | 6 | 5 | 2  | 189 | 3   | 80  |
| C17322799_5277717      | 24 | aaaugcauuuagcaccaccuggac | 0 | 272 | 272 | 5  | 7 | 4 | 8  | 87  | 89  | 96  |
| scaffold163965_1175573 | 23 | uaaaugcauuuagcaccuucuga  | 0 | 270 | 237 | 8  | 5 | 3 | 7  | 82  | 56  | 99  |
| C12802823_3638555      | 23 | uaaaugcauuuagcaccuucugg  | 0 | 270 | 251 | 8  | 5 | 4 | 6  | 81  | 55  | 115 |
| C14211119_3988803      | 24 | accuucuuucgguugagagcagcc | 0 | 270 | 266 | 6  | 7 | 6 | 5  | 125 | 66  | 75  |
| scaffold275297_1969095 | 24 | agagugaucacuaggccuggcuc  | 0 | 270 | 270 | 5  | 6 | 8 | 5  | 113 | 99  | 58  |



|                        |    |                          |   |     |     |    |    |   |    |     |     |     |
|------------------------|----|--------------------------|---|-----|-----|----|----|---|----|-----|-----|-----|
| scaffold74436_543249   | 24 | agagugaucacuagaccuggcuc  | 0 | 269 | 266 | 5  | 6  | 7 | 6  | 113 | 58  | 95  |
| scaffold165863_1188419 | 23 | uaaaugcauuagcaccucugg    | 0 | 269 | 266 | 7  | 6  | 4 | 6  | 68  | 86  | 112 |
| scaffold90869_674989   | 24 | uguagacaccccgauccgugacc  | 0 | 269 | 266 | 4  | 10 | 5 | 5  | 44  | 141 | 81  |
| scaffold387174_2783812 | 24 | accuucuuucgguugagagcagcc | 0 | 269 | 268 | 6  | 7  | 6 | 5  | 126 | 66  | 76  |
| C16238419_4623102      | 24 | auuguagcucaaagggggcaucc  | 0 | 269 | 269 | 5  | 6  | 7 | 6  | 85  | 30  | 154 |
| scaffold170428_1219615 | 24 | uacggugguacuguucacagucac | 0 | 268 | 157 | 7  | 6  | 6 | 5  | 49  | 59  | 49  |
| scaffold64306_471856   | 24 | auuuuacugcaaugugaacuugc  | 0 | 268 | 232 | 10 | 4  | 4 | 6  | 117 | 47  | 68  |
| C13773805_3883613      | 24 | auuuuacugcaaugugaacuugc  | 0 | 268 | 232 | 10 | 4  | 4 | 6  | 117 | 47  | 68  |
| scaffold12067_90958    | 23 | uaaaugcauuuagcaccuucugg  | 0 | 268 | 254 | 8  | 5  | 4 | 6  | 88  | 58  | 108 |
| scaffold188898_1348695 | 24 | agagugaucacuagaccuggcuc  | 0 | 268 | 266 | 5  | 6  | 7 | 6  | 113 | 58  | 95  |
| scaffold210757_1509181 | 24 | accuucuuucgguugagagcagcc | 0 | 268 | 266 | 6  | 7  | 6 | 5  | 125 | 66  | 75  |
| scaffold91508_665676   | 23 | uaaaugcauuuagcaccuucugg  | 0 | 267 | 258 | 8  | 5  | 4 | 6  | 91  | 58  | 109 |
| scaffold177022_1265233 | 24 | aucuauuacaaagcuacucgagc  | 0 | 267 | 264 | 5  | 6  | 3 | 10 | 163 | 41  | 60  |
| scaffold87422_635971   | 24 | agagugaucacuagaccuggcuc  | 0 | 267 | 266 | 5  | 6  | 7 | 6  | 113 | 58  | 95  |
| C13470712_3804133      | 22 | cugacuggaugccacguggcgc   | 0 | 266 | 234 | 4  | 7  | 8 | 3  | 71  | 106 | 57  |
| scaffold85953_625425   | 23 | uguuaggauuuuuuguuuuggac  | 0 | 265 | 257 | 13 | 1  | 6 | 3  | 154 | 56  | 47  |
| scaffold187970_1342624 | 23 | uaaaugcauuuagcaccuucugg  | 0 | 265 | 258 | 8  | 5  | 4 | 6  | 91  | 58  | 109 |
| C16450474_4718250      | 23 | uaaaugcauuuagcaccuucugg  | 0 | 264 | 225 | 8  | 5  | 4 | 6  | 75  | 46  | 104 |
| scaffold330609_2362397 | 23 | uaaaugcauuuagcaccuucugg  | 0 | 264 | 251 | 8  | 5  | 4 | 6  | 81  | 55  | 115 |
| scaffold98739_715967   | 23 | uaaaugcauuuagcaccuucugg  | 0 | 264 | 253 | 8  | 5  | 4 | 6  | 81  | 56  | 116 |
| scaffold404675_2936716 | 24 | aaaugcauuuagcauccuuggac  | 0 | 264 | 264 | 7  | 6  | 4 | 7  | 120 | 35  | 109 |
| scaffold404675_2936714 | 24 | aaaugcauuuagcauccuuggac  | 0 | 264 | 264 | 7  | 6  | 4 | 7  | 120 | 35  | 109 |
| scaffold275818_1972867 | 23 | uaaaugcauuuagcaccuucugg  | 0 | 263 | 258 | 8  | 5  | 4 | 6  | 91  | 58  | 109 |
| scaffold232472_1663364 | 23 | uaaaugcauuuagcaccuucugg  | 0 | 263 | 258 | 8  | 5  | 4 | 6  | 91  | 58  | 109 |
| C12910311_3664768      | 23 | uaaaugcauuuagcaccuucugg  | 0 | 263 | 258 | 8  | 5  | 4 | 6  | 91  | 58  | 109 |
| C15358751_4305780      | 23 | uaaaugcauuuagcaccuucugg  | 0 | 262 | 258 | 8  | 5  | 4 | 6  | 91  | 58  | 109 |

|                        |    |                           |   |     |     |    |   |   |    |     |     |     |
|------------------------|----|---------------------------|---|-----|-----|----|---|---|----|-----|-----|-----|
| C16326449_4660830      | 21 | uuuuuuaucgcaauucugcu      | 0 | 262 | 261 | 11 | 5 | 2 | 3  | 142 | 94  | 25  |
| scaffold77291_563578   | 23 | uaaaugcauuuagcaccuucuga   | 0 | 261 | 234 | 8  | 5 | 3 | 7  | 80  | 56  | 98  |
| scaffold1650_12948     | 23 | uaaaugcauuuagcaccuucugg   | 0 | 261 | 251 | 8  | 5 | 4 | 6  | 81  | 55  | 115 |
| C12555887_3579048      | 23 | uaaaugcauuuagcaccuucugg   | 0 | 261 | 258 | 8  | 5 | 4 | 6  | 91  | 58  | 109 |
| scaffold31285_233749   | 23 | uaaaugcauuuagcaccuucugg   | 0 | 261 | 259 | 8  | 5 | 4 | 6  | 91  | 59  | 109 |
| scaffold88136_640829   | 23 | uaaaugcauuuagcaccuucugg   | 0 | 261 | 260 | 8  | 5 | 4 | 6  | 91  | 59  | 110 |
| scaffold361934_2591846 | 23 | uaaaugcauuuagcaccuucugg   | 0 | 261 | 260 | 8  | 5 | 4 | 6  | 91  | 59  | 110 |
| scaffold240235_1721434 | 23 | uaaaugcauuuagcaccuucugg   | 0 | 260 | 258 | 8  | 5 | 4 | 6  | 91  | 58  | 109 |
| scaffold61839_454606   | 23 | uaaaugcauuuagcaccuucugg   | 0 | 260 | 258 | 8  | 5 | 4 | 6  | 91  | 58  | 109 |
| scaffold111863_809940  | 24 | auuuuaguacauuguacuggcacc  | 0 | 260 | 259 | 9  | 5 | 4 | 6  | 87  | 101 | 71  |
| scaffold323746_2312901 | 23 | uaaaugcauuuagcaccuucugg   | 0 | 259 | 258 | 8  | 5 | 4 | 6  | 91  | 58  | 109 |
| scaffold392875_2831098 | 23 | uaaaugcauuuagcaccuucugg   | 0 | 259 | 258 | 8  | 5 | 4 | 6  | 91  | 58  | 109 |
| scaffold16384_123852   | 23 | uaaaugcauuuagcaccuucugg   | 0 | 259 | 258 | 8  | 5 | 4 | 6  | 91  | 58  | 109 |
| scaffold3838_32426     | 23 | uaaaugcauuuagcaccuucugg   | 0 | 259 | 258 | 8  | 5 | 4 | 6  | 91  | 58  | 109 |
| scaffold120217_868859  | 23 | uaaaugcauuuagcaccuucugg   | 0 | 259 | 258 | 8  | 5 | 4 | 6  | 91  | 58  | 109 |
| C15358751_4305779      | 23 | uaaaugcauuuagcaccuucugg   | 0 | 259 | 258 | 8  | 5 | 4 | 6  | 91  | 58  | 109 |
| C13317965_3765379      | 23 | uaaaugcauuuagcaccuucugg   | 0 | 259 | 258 | 8  | 5 | 4 | 6  | 91  | 58  | 109 |
| scaffold26561_199400   | 23 | uaaaugcauuuagcaccuucugg   | 0 | 259 | 258 | 8  | 5 | 4 | 6  | 91  | 58  | 109 |
| C13522280_3817087      | 23 | uaaaugcauuuagcaccuucugg   | 0 | 259 | 258 | 8  | 5 | 4 | 6  | 91  | 58  | 109 |
| scaffold196895_1407364 | 24 | aaaauauaggauugcaauaugaacu | 0 | 259 | 259 | 7  | 2 | 4 | 11 | 144 | 40  | 75  |
| scaffold304806_2177134 | 24 | uaaaauauaggacugcaauaugaac | 0 | 259 | 259 | 6  | 3 | 4 | 11 | 145 | 40  | 74  |
| scaffold161830_1160381 | 23 | uaaaugcauuuagcaccuucugg   | 0 | 258 | 258 | 8  | 5 | 4 | 6  | 91  | 58  | 109 |
| scaffold87554_637658   | 23 | uaaaugcauuuagcaccuucugg   | 0 | 258 | 258 | 8  | 5 | 4 | 6  | 91  | 58  | 109 |
| scaffold187734_1341200 | 23 | uaaaugcauuuagcaccuucugg   | 0 | 258 | 258 | 8  | 5 | 4 | 6  | 91  | 58  | 109 |
| scaffold279705_1999975 | 23 | uaaaugcauuuagcaccuucugg   | 0 | 258 | 258 | 8  | 5 | 4 | 6  | 91  | 58  | 109 |
| scaffold176503_1262014 | 23 | uaaaugcauuuagcaccuucugg   | 0 | 258 | 258 | 8  | 5 | 4 | 6  | 91  | 58  | 109 |

|                        |    |                          |   |     |     |    |   |   |   |     |     |     |
|------------------------|----|--------------------------|---|-----|-----|----|---|---|---|-----|-----|-----|
| scaffold178163_1273784 | 23 | uaaaugcauuuagcaccuucugg  | 0 | 258 | 258 | 8  | 5 | 4 | 6 | 91  | 58  | 109 |
| scaffold28613_214223   | 23 | uaaaugcauuuagcaccuucugg  | 0 | 258 | 258 | 8  | 5 | 4 | 6 | 91  | 58  | 109 |
| C13250209_3748856      | 23 | uaaaugcauuuagcaccuucugg  | 0 | 256 | 249 | 8  | 5 | 4 | 6 | 81  | 54  | 114 |
| C16055165_4549147      | 23 | uaaaugcauuuagcaccuucugg  | 0 | 256 | 251 | 8  | 5 | 4 | 6 | 81  | 55  | 115 |
| scaffold204712_1464337 | 22 | cauguuuuuuaauaucuuggac   | 0 | 255 | 254 | 11 | 3 | 3 | 5 | 172 | 55  | 27  |
| scaffold72074_526146   | 24 | gaaauuccagaaccaugaucgauc | 0 | 255 | 255 | 5  | 6 | 4 | 9 | 90  | 77  | 88  |
| scaffold212555_1521638 | 23 | uaaaugcauuuagcaccuucugg  | 0 | 254 | 251 | 8  | 5 | 4 | 6 | 81  | 55  | 115 |
| scaffold260095_1860104 | 23 | uaaaugcauuuagcaccucugg   | 0 | 254 | 252 | 7  | 6 | 4 | 6 | 55  | 86  | 111 |
| scaffold284478_2034276 | 23 | uaaaugcauuuagcaccuucugg  | 0 | 254 | 254 | 8  | 5 | 4 | 6 | 88  | 58  | 108 |
| scaffold186544_1332582 | 22 | ggaagauuuugucauugucuc    | 0 | 253 | 246 | 9  | 3 | 6 | 4 | 113 | 108 | 25  |
| scaffold9375_70053     | 23 | uaaaugcauuuagcaccuucugg  | 0 | 253 | 251 | 8  | 5 | 4 | 6 | 81  | 55  | 115 |
| C13644123_3849341      | 24 | aaauaggacugcaauaugaacuuu | 0 | 252 | 197 | 8  | 3 | 4 | 9 | 63  | 55  | 79  |
| scaffold255964_1829976 | 23 | aaggaccgaguauaugugcaca   | 0 | 252 | 206 | 5  | 4 | 6 | 8 | 87  | 60  | 59  |
| C16122021_4577499      | 23 | uaaaugcauuuagcaccuucugg  | 0 | 252 | 247 | 8  | 5 | 4 | 6 | 80  | 53  | 114 |
| scaffold153257_1100168 | 23 | uaaaugcauuuagcaccuucugg  | 0 | 252 | 248 | 8  | 5 | 4 | 6 | 81  | 53  | 114 |
| scaffold186745_1334050 | 23 | uaaaugcauuuagcaccuucugg  | 0 | 252 | 251 | 8  | 5 | 4 | 6 | 81  | 55  | 115 |
| scaffold334373_2389124 | 23 | uaaaugcauuuagcaccuucugg  | 0 | 252 | 251 | 8  | 5 | 4 | 6 | 81  | 55  | 115 |
| scaffold163929_1175514 | 23 | uaaaugcauuuagcaccuucugg  | 0 | 252 | 251 | 8  | 5 | 4 | 6 | 81  | 55  | 115 |
| scaffold187513_1339673 | 23 | uaaaugcauuuagcaccuucugg  | 0 | 251 | 251 | 8  | 5 | 4 | 6 | 81  | 55  | 115 |
| scaffold334373_2389122 | 23 | uaaaugcauuuagcaccuucugg  | 0 | 251 | 251 | 8  | 5 | 4 | 6 | 81  | 55  | 115 |
| C17051483_5059194      | 23 | uaaaugcauuuagcaccuucugg  | 0 | 251 | 251 | 8  | 5 | 4 | 6 | 81  | 55  | 115 |
| scaffold404432_2924927 | 23 | uaaaugcauuuagcaccuucugg  | 0 | 251 | 251 | 8  | 5 | 4 | 6 | 81  | 55  | 115 |
| scaffold334373_2389123 | 23 | uaaaugcauuuagcaccuucugg  | 0 | 251 | 251 | 8  | 5 | 4 | 6 | 81  | 55  | 115 |
| scaffold245897_1758362 | 23 | uaaaugcauuuagcaccuucugg  | 0 | 251 | 251 | 8  | 5 | 4 | 6 | 81  | 55  | 115 |
| scaffold190777_1362897 | 23 | uaaaugcauuuagcaccuucugg  | 0 | 251 | 251 | 8  | 5 | 4 | 6 | 81  | 55  | 115 |
| C16719984_4852838      | 23 | uaaaugcauuuagcaccuucugg  | 0 | 251 | 251 | 8  | 5 | 4 | 6 | 81  | 55  | 115 |

|                        |    |                          |   |     |     |    |   |   |   |     |    |     |
|------------------------|----|--------------------------|---|-----|-----|----|---|---|---|-----|----|-----|
| C13137013_3720591      | 23 | uaaaugcauuuagcaccuucugg  | 0 | 251 | 251 | 8  | 5 | 4 | 6 | 81  | 55 | 115 |
| scaffold77291_563573   | 23 | uaaaugcauuuagcaccuucugg  | 0 | 251 | 251 | 8  | 5 | 4 | 6 | 81  | 55 | 115 |
| scaffold51981_383099   | 23 | uaaaugcauuuagcaccuucugg  | 0 | 250 | 249 | 8  | 5 | 4 | 6 | 81  | 54 | 114 |
| C15365037_4307496      | 24 | auguuuacucggccuuaggaacc  | 0 | 249 | 89  | 7  | 7 | 5 | 5 | 38  | 28 | 23  |
| scaffold207171_1483139 | 23 | uaaaugcauuuagcaccucugg   | 0 | 249 | 241 | 7  | 6 | 4 | 6 | 54  | 79 | 108 |
| scaffold72079_531274   | 23 | uaaaugcauuuagcaccuucugg  | 0 | 249 | 248 | 8  | 5 | 4 | 6 | 81  | 53 | 114 |
| C12857813_3651791      | 24 | gucuauuuucggguuguaggac   | 0 | 249 | 249 | 10 | 3 | 7 | 4 | 140 | 43 | 66  |
| scaffold312858_2234117 | 23 | uaaaugcauuuagcaccuucugg  | 0 | 249 | 249 | 8  | 5 | 4 | 6 | 81  | 54 | 114 |
| scaffold304446_2175021 | 23 | uaaaugcauuuagcaccuucugg  | 0 | 249 | 249 | 8  | 5 | 4 | 6 | 81  | 54 | 114 |
| scaffold316381_2261288 | 23 | uaaaugcauuuagcaccuucugg  | 0 | 249 | 249 | 8  | 5 | 4 | 6 | 81  | 54 | 114 |
| scaffold243353_1740077 | 24 | ucuuuuucuggauaacaauacc   | 0 | 248 | 242 | 8  | 5 | 2 | 9 | 134 | 51 | 57  |
| scaffold63808_468009   | 23 | uaaaugcauuuagcaccuucugg  | 0 | 248 | 248 | 8  | 5 | 4 | 6 | 81  | 53 | 114 |
| scaffold115891_838124  | 23 | uaaaugcauuuagcaccuucugg  | 0 | 248 | 248 | 8  | 5 | 4 | 6 | 81  | 53 | 114 |
| scaffold186673_1333784 | 23 | uaaaugcauuuagcaccuucugg  | 0 | 248 | 248 | 8  | 5 | 4 | 6 | 81  | 53 | 114 |
| scaffold263113_1881675 | 23 | uaaaugcauuuagcaccuucugg  | 0 | 248 | 248 | 8  | 5 | 4 | 6 | 81  | 53 | 114 |
| scaffold154508_1108915 | 23 | uaaaugcauuuagcaccuucugg  | 0 | 248 | 248 | 8  | 5 | 4 | 6 | 81  | 53 | 114 |
| C16552248_4766229      | 23 | uaaaugcauuuagcaccuucugg  | 0 | 248 | 248 | 8  | 5 | 4 | 6 | 81  | 53 | 114 |
| scaffold72079_531273   | 23 | uaaaugcauuuagcaccuucugg  | 0 | 248 | 248 | 8  | 5 | 4 | 6 | 81  | 53 | 114 |
| C16009921_4532811      | 23 | uaaaugcauuuagcaccuucugg  | 0 | 248 | 248 | 8  | 5 | 4 | 6 | 81  | 53 | 114 |
| C12706119_3614980      | 23 | uaaaugcauuuagcaccuucuga  | 0 | 247 | 204 | 8  | 5 | 3 | 7 | 78  | 38 | 88  |
| scaffold401465_2899953 | 18 | ccauacauagcuuuggcc       | 0 | 245 | 244 | 5  | 6 | 3 | 4 | 218 | 0  | 26  |
| scaffold165949_1188733 | 24 | augauuuuggagugcuagaguacu | 0 | 244 | 189 | 9  | 2 | 7 | 6 | 99  | 32 | 58  |
| scaffold104539_756502  | 24 | ugcaauacacggaccgaauuuggc | 0 | 244 | 228 | 5  | 6 | 6 | 7 | 87  | 66 | 75  |
| scaffold118764_858529  | 23 | uaaaugcauuuagcaccuucuga  | 0 | 244 | 233 | 8  | 5 | 3 | 7 | 81  | 53 | 99  |
| C14572970_4081140      | 23 | agcuuacucgguccuaaggaacc  | 0 | 244 | 234 | 5  | 7 | 5 | 6 | 113 | 53 | 68  |
| scaffold406680_2945682 | 23 | uaaaugcauuuagcaccucugg   | 0 | 244 | 243 | 7  | 6 | 4 | 6 | 56  | 79 | 108 |

|                        |    |                          |   |     |     |    |   |   |   |     |     |     |
|------------------------|----|--------------------------|---|-----|-----|----|---|---|---|-----|-----|-----|
| scaffold80816_591002   | 23 | uaaaugcauuuagcaccuucugg  | 0 | 243 | 241 | 8  | 5 | 4 | 6 | 81  | 54  | 106 |
| scaffold413975_3008689 | 24 | cuuuccgugaaccaaacgaggccu | 0 | 243 | 242 | 5  | 8 | 5 | 6 | 51  | 88  | 103 |
| scaffold22925_171328   | 23 | uaaaugcauuuagcaccucugg   | 0 | 243 | 243 | 7  | 6 | 4 | 6 | 56  | 79  | 108 |
| C12983021_3682799      | 23 | uaaaugcauuuagcaccuucugg  | 0 | 241 | 230 | 8  | 5 | 4 | 6 | 77  | 47  | 106 |
| scaffold398951_2880019 | 23 | uaaaugcauuuagcaccuucuga  | 0 | 241 | 236 | 8  | 5 | 3 | 7 | 81  | 56  | 99  |
| C14591350_4086134      | 23 | uaaaugcauuuagcaccuucugg  | 0 | 241 | 241 | 8  | 5 | 4 | 6 | 81  | 54  | 106 |
| scaffold81846_595207   | 23 | uaaaugcauuuagcaccuucugg  | 0 | 241 | 241 | 8  | 5 | 4 | 6 | 81  | 54  | 106 |
| scaffold118967_859830  | 23 | uaaaugcauuuagcaccuucugg  | 0 | 241 | 241 | 8  | 5 | 4 | 6 | 81  | 54  | 106 |
| scaffold55887_412017   | 24 | aagcacggacacucucuuggaggc | 0 | 241 | 241 | 4  | 7 | 7 | 6 | 68  | 69  | 104 |
| C17294333_5252889      | 24 | cccaugaguugaaccuugaccuc  | 0 | 241 | 241 | 6  | 9 | 4 | 5 | 50  | 103 | 88  |
| scaffold25254_188958   | 23 | uaaaugcauuuagcaccuucuga  | 0 | 240 | 227 | 8  | 5 | 3 | 7 | 79  | 52  | 96  |
| scaffold395594_2852586 | 23 | uaaaugcauuuagcaccuucuga  | 0 | 239 | 238 | 8  | 5 | 3 | 7 | 81  | 57  | 100 |
| C16623458_4802801      | 24 | aaaugcauuuagcaccaccuggac | 0 | 239 | 238 | 5  | 7 | 4 | 8 | 91  | 74  | 73  |
| C16623458_4802802      | 24 | aaaugcauuuagcaccaccuggac | 0 | 238 | 238 | 5  | 7 | 4 | 8 | 91  | 74  | 73  |
| scaffold122516_883421  | 23 | uaaaugcauuuagcaccuucugg  | 0 | 237 | 196 | 8  | 5 | 4 | 6 | 65  | 51  | 80  |
| scaffold315154_2251147 | 24 | ucucauuaguuggcccuaggcac  | 0 | 237 | 230 | 7  | 7 | 6 | 4 | 42  | 26  | 162 |
| scaffold220164_1573071 | 24 | acucagaaggacuugaguaccauc | 0 | 237 | 235 | 5  | 6 | 5 | 8 | 105 | 57  | 73  |
| scaffold275818_1972866 | 23 | uaaaugcauuuagcaccuucuga  | 0 | 237 | 236 | 8  | 5 | 3 | 7 | 81  | 56  | 99  |
| scaffold154417_1108226 | 23 | uaaaugcauuuagcaccuucuga  | 0 | 237 | 236 | 8  | 5 | 3 | 7 | 81  | 56  | 99  |
| scaffold251772_1801066 | 23 | uaaaugcauuuagcaccuucugg  | 0 | 237 | 237 | 8  | 5 | 4 | 6 | 81  | 54  | 102 |
| scaffold358379_2565547 | 23 | uaaaugcauuuagcaccuucuga  | 0 | 237 | 237 | 8  | 5 | 3 | 7 | 82  | 56  | 99  |
| scaffold157632_1131325 | 24 | gguuucggccgauacuuugaacca | 0 | 236 | 199 | 7  | 6 | 6 | 5 | 99  | 53  | 47  |
| scaffold113584_822096  | 24 | auuuuacugcaauaugaacuugc  | 0 | 236 | 235 | 10 | 4 | 3 | 7 | 115 | 47  | 73  |
| scaffold189563_1353389 | 23 | uaaaugcauuuagcaccuucuga  | 0 | 236 | 236 | 8  | 5 | 3 | 7 | 81  | 56  | 99  |
| scaffold189563_1353390 | 23 | uaaaugcauuuagcaccuucuga  | 0 | 236 | 236 | 8  | 5 | 3 | 7 | 81  | 56  | 99  |
| C15502467_4352333      | 23 | uaaaugcauuuagcaccuucuga  | 0 | 236 | 236 | 8  | 5 | 3 | 7 | 81  | 56  | 99  |

|                        |    |                          |   |     |     |    |    |   |   |     |    |     |
|------------------------|----|--------------------------|---|-----|-----|----|----|---|---|-----|----|-----|
| scaffold177465_1268505 | 22 | caugaucgaucauggccuggcg   | 0 | 236 | 236 | 5  | 6  | 7 | 4 | 60  | 67 | 109 |
| C16610526_4795277      | 24 | uaauaccgggacuaacuuuuuacc | 0 | 235 | 231 | 6  | 6  | 3 | 9 | 114 | 43 | 74  |
| C13196689_3735134      | 23 | uaaaugcauuuagcaccuucuga  | 0 | 235 | 235 | 8  | 5  | 3 | 7 | 82  | 53 | 100 |
| scaffold189991_1356453 | 23 | uaaaugcauuuagcaccuucuga  | 0 | 235 | 235 | 8  | 5  | 3 | 7 | 82  | 53 | 100 |
| scaffold324813_2320597 | 23 | uaaaugcauuuagcaccuucugg  | 0 | 234 | 234 | 8  | 5  | 4 | 6 | 71  | 51 | 112 |
| C14401042_4036637      | 23 | uaaaugcauuuagcaccuucugg  | 0 | 234 | 234 | 8  | 5  | 4 | 6 | 71  | 51 | 112 |
| C15284601_4282242      | 23 | uaaaugcauuuagcaccuucugg  | 0 | 234 | 234 | 8  | 5  | 4 | 6 | 71  | 51 | 112 |
| C16349949_4672707      | 23 | uaaaugcauuuagcaccuucuga  | 0 | 234 | 234 | 8  | 5  | 3 | 7 | 82  | 53 | 99  |
| scaffold44013_325431   | 24 | auggacagagcccacagucgacu  | 0 | 233 | 68  | 4  | 7  | 6 | 7 | 19  | 15 | 34  |
| C13061632_3701864      | 22 | guguuaaaacaugucuaggacc   | 0 | 233 | 124 | 6  | 4  | 5 | 7 | 73  | 31 | 20  |
| scaffold217180_1553109 | 23 | caugaucgaucauggcuuugccc  | 0 | 233 | 224 | 7  | 7  | 5 | 4 | 93  | 88 | 43  |
| C16500608_4740606      | 24 | uauuuuucaucauguaguuaacc  | 0 | 233 | 233 | 11 | 4  | 2 | 7 | 104 | 64 | 65  |
| scaffold266460_1905386 | 22 | caugaucgaucauggccuggcg   | 0 | 233 | 233 | 5  | 6  | 7 | 4 | 55  | 71 | 107 |
| scaffold150918_1083689 | 23 | uaaaugcauuuagcaccuucugg  | 0 | 232 | 224 | 8  | 5  | 4 | 6 | 74  | 46 | 104 |
| scaffold77617_569937   | 23 | uaaaugcauuuagcaccuucugg  | 0 | 231 | 226 | 8  | 5  | 4 | 6 | 76  | 46 | 104 |
| scaffold159334_1142668 | 24 | cccgaccgaaaccgaaaacacccc | 0 | 231 | 231 | 0  | 12 | 3 | 9 | 52  | 81 | 98  |
| C16282533_4642039      | 23 | uaaaugcauuuagcaccuucugg  | 0 | 230 | 221 | 8  | 5  | 4 | 6 | 74  | 45 | 102 |
| scaffold61852_454631   | 23 | caugaucgaucauggcuuugccc  | 0 | 230 | 224 | 7  | 7  | 5 | 4 | 93  | 88 | 43  |
| scaffold182039_1300147 | 23 | uaaaugcauuuagcaccuucuga  | 0 | 229 | 224 | 8  | 5  | 3 | 7 | 77  | 52 | 95  |
| scaffold257134_1838277 | 23 | agcuuacucgguccuaaggaacc  | 0 | 229 | 228 | 5  | 7  | 5 | 6 | 113 | 50 | 65  |
| scaffold215997_1563799 | 24 | acaagucacucgguccuaaggaac | 0 | 228 | 198 | 4  | 7  | 5 | 8 | 87  | 49 | 62  |
| C16585830_4782427      | 24 | acaaggcgguaaagagcguggccc | 0 | 228 | 226 | 2  | 6  | 9 | 7 | 91  | 51 | 84  |
| scaffold440264_3272069 | 24 | aauguacaacucauuuaugcacc  | 0 | 228 | 227 | 7  | 6  | 2 | 9 | 115 | 39 | 73  |
| C13246455_3747508      | 23 | uaaaugcauuuagcaccuucugg  | 0 | 228 | 227 | 8  | 5  | 4 | 6 | 78  | 45 | 104 |
| scaffold12710_96270    | 23 | uaaaugcauuuagcaccuucugg  | 0 | 228 | 227 | 8  | 5  | 4 | 6 | 77  | 46 | 104 |
| scaffold231916_1659359 | 23 | uaaaugcauuuagcaccuucuga  | 0 | 228 | 227 | 8  | 5  | 3 | 7 | 79  | 52 | 96  |

|                        |    |                          |   |     |     |   |   |   |   |    |     |     |
|------------------------|----|--------------------------|---|-----|-----|---|---|---|---|----|-----|-----|
| scaffold16227_122322   | 23 | uaaaugcauuuagcaccuucuga  | 0 | 228 | 227 | 8 | 5 | 3 | 7 | 79 | 52  | 96  |
| scaffold125370_904696  | 23 | uaaaugcauuuagcaccuucuga  | 0 | 228 | 227 | 8 | 5 | 3 | 7 | 78 | 53  | 96  |
| scaffold331056_2365495 | 23 | uaaaugcauuuagcaccuucugg  | 0 | 228 | 228 | 8 | 5 | 4 | 6 | 77 | 46  | 105 |
| C13095026_3710087      | 24 | uuuggccaauaccaaccugaccc  | 0 | 227 | 196 | 5 | 9 | 3 | 7 | 72 | 73  | 51  |
| scaffold19485_146142   | 24 | auuucgggucagacagcuuaacc  | 0 | 227 | 197 | 6 | 7 | 5 | 6 | 77 | 57  | 63  |
| scaffold74273_542136   | 24 | acaagucacucgguccuaaggaac | 0 | 227 | 198 | 4 | 7 | 5 | 8 | 88 | 48  | 62  |
| scaffold20003_150178   | 22 | caggccccacagcuuagacgc    | 0 | 227 | 221 | 3 | 9 | 5 | 5 | 43 | 167 | 11  |
| C15556899_4369852      | 23 | uaaaugcauuuagcaccuucugg  | 0 | 227 | 225 | 8 | 5 | 4 | 6 | 75 | 46  | 104 |
| C14112289_3964433      | 23 | uaaaugcauuuagcaccuucugg  | 0 | 227 | 227 | 8 | 5 | 4 | 6 | 78 | 45  | 104 |
| scaffold87104_634039   | 23 | uaaaugcauuuagcaccuucugg  | 0 | 227 | 227 | 8 | 5 | 4 | 6 | 78 | 45  | 104 |
| scaffold78486_571269   | 23 | uaaaugcauuuagcaccuucuga  | 0 | 227 | 227 | 8 | 5 | 3 | 7 | 79 | 52  | 96  |
| scaffold172404_1233460 | 23 | uaaaugcauuuagcaccuucuga  | 0 | 227 | 227 | 8 | 5 | 3 | 7 | 79 | 52  | 96  |
| C13129735_3718687      | 23 | uaaaugcauuuagcaccuucuga  | 0 | 227 | 227 | 8 | 5 | 3 | 7 | 79 | 52  | 96  |
| scaffold69267_506905   | 23 | uaaaugcauuuagcaccuucuga  | 0 | 226 | 225 | 8 | 5 | 3 | 7 | 78 | 52  | 95  |
| scaffold322637_2305499 | 23 | uaaaugcauuuagcaccuucugg  | 0 | 226 | 226 | 8 | 5 | 4 | 6 | 78 | 45  | 103 |
| scaffold122755_885357  | 24 | gcaaugaggucggcugucuagagc | 0 | 226 | 226 | 5 | 5 | 9 | 5 | 88 | 68  | 70  |
| scaffold358222_2564840 | 23 | uaaaugcauuuagcaccuucugg  | 0 | 225 | 218 | 8 | 5 | 4 | 6 | 73 | 44  | 101 |
| scaffold164448_1179365 | 23 | uaaaugcauuuagcaccuucugg  | 0 | 225 | 225 | 8 | 5 | 4 | 6 | 75 | 46  | 104 |
| scaffold131769_949432  | 23 | uaaaugcauuuagcaccuucugg  | 0 | 225 | 225 | 8 | 5 | 4 | 6 | 75 | 46  | 104 |
| C12750319_3625728      | 23 | uaaaugcauuuagcaccuucugg  | 0 | 225 | 225 | 8 | 5 | 4 | 6 | 75 | 46  | 104 |
| scaffold31285_233745   | 23 | uaaaugcauuuagcaccuucugg  | 0 | 225 | 225 | 8 | 5 | 4 | 6 | 75 | 46  | 104 |
| C13216261_3739951      | 24 | uauguauugauacaucugaugcc  | 0 | 224 | 187 | 9 | 4 | 5 | 6 | 60 | 79  | 48  |
| scaffold184163_1315575 | 23 | uaaaugcauuuagcaccuucugg  | 0 | 224 | 219 | 8 | 5 | 4 | 6 | 74 | 44  | 101 |
| C17005331_5026099      | 23 | uaaaugcauuuagcaccuucugg  | 0 | 224 | 221 | 8 | 5 | 4 | 6 | 75 | 44  | 102 |
| scaffold141891_1020618 | 24 | aucgaucagcgaugccguggcuc  | 0 | 224 | 222 | 5 | 7 | 7 | 5 | 80 | 59  | 83  |
| scaffold52535_387866   | 23 | uaaaugcauuuagcaccuucugg  | 0 | 224 | 223 | 8 | 5 | 4 | 6 | 75 | 45  | 103 |

|                        |    |                          |   |     |     |    |    |   |   |     |     |     |
|------------------------|----|--------------------------|---|-----|-----|----|----|---|---|-----|-----|-----|
| scaffold51587_380144   | 23 | uaaaugcauuuagcaccuucugg  | 0 | 224 | 224 | 8  | 5  | 4 | 6 | 75  | 46  | 103 |
| scaffold294086_2101574 | 22 | auguacaacucauuuauugcacc  | 0 | 224 | 224 | 6  | 6  | 2 | 8 | 81  | 62  | 81  |
| scaffold35775_266373   | 23 | caugaucgaucauggcuuugccc  | 0 | 224 | 224 | 7  | 7  | 5 | 4 | 93  | 88  | 43  |
| C12979701_3681885      | 23 | uaaaugcauuuagcaccuucugg  | 0 | 223 | 221 | 8  | 5  | 4 | 6 | 75  | 44  | 102 |
| C13466976_3803006      | 23 | gcaaugugaacuuugcaguccau  | 0 | 223 | 222 | 7  | 5  | 5 | 6 | 72  | 55  | 95  |
| C13656061_3852372      | 24 | auuuagcaccgcuggacagcaac  | 0 | 222 | 122 | 4  | 8  | 5 | 7 | 42  | 45  | 35  |
| scaffold245897_1758361 | 23 | uaaaugcauuuagcaccuucugg  | 0 | 222 | 219 | 8  | 5  | 4 | 6 | 74  | 44  | 101 |
| scaffold297794_2128365 | 24 | cugcauccggaucccccacagc   | 0 | 222 | 221 | 4  | 11 | 4 | 5 | 30  | 76  | 115 |
| scaffold354698_2538710 | 22 | caggccccacagcuuagacgc    | 0 | 222 | 221 | 3  | 9  | 5 | 5 | 43  | 167 | 11  |
| scaffold252226_1806089 | 23 | uaaaugcauuuagcaccuucugg  | 0 | 222 | 222 | 8  | 5  | 4 | 6 | 76  | 44  | 102 |
| scaffold224563_1605405 | 23 | uaaaugcauuuagcaccuucugg  | 0 | 222 | 222 | 8  | 5  | 4 | 6 | 75  | 45  | 102 |
| scaffold28923_216789   | 23 | uaaaugcauuuagcaccuucugg  | 0 | 222 | 222 | 8  | 5  | 4 | 6 | 75  | 45  | 102 |
| scaffold221131_1581472 | 23 | uaaaugcauuuagcaccuucugg  | 0 | 221 | 189 | 8  | 5  | 4 | 6 | 64  | 47  | 78  |
| scaffold34414_256705   | 23 | uaaaugcauuuagcaccuucugg  | 0 | 221 | 219 | 8  | 5  | 4 | 6 | 74  | 44  | 101 |
| scaffold403640_2918419 | 23 | uaaaugcauuuagcaccuucugg  | 0 | 221 | 221 | 8  | 5  | 4 | 6 | 75  | 44  | 102 |
| scaffold8660_64880     | 23 | uaaaugcauuuagcaccuucugg  | 0 | 221 | 221 | 8  | 5  | 4 | 6 | 75  | 44  | 102 |
| scaffold78486_571255   | 23 | uaaaugcauuuagcaccuucugg  | 0 | 221 | 221 | 8  | 5  | 4 | 6 | 75  | 44  | 102 |
| scaffold236925_1694923 | 23 | uaaaugcauuuagcaccuucugg  | 0 | 221 | 221 | 8  | 5  | 4 | 6 | 75  | 44  | 102 |
| scaffold36104_268608   | 23 | uaaaugcauuuagcaccuucugg  | 0 | 221 | 221 | 8  | 5  | 4 | 6 | 75  | 44  | 102 |
| scaffold190497_1360666 | 23 | uaaaugcauuuagcaccuucugg  | 0 | 221 | 221 | 8  | 5  | 4 | 6 | 75  | 44  | 102 |
| scaffold54972_405208   | 24 | auuaguguaacccgaacagacc   | 0 | 221 | 221 | 4  | 8  | 4 | 8 | 136 | 54  | 31  |
| C13308873_3762941      | 23 | caugaucgaucauggcuuugccc  | 0 | 221 | 221 | 7  | 7  | 5 | 4 | 93  | 88  | 40  |
| scaffold305983_2188832 | 24 | auuuagcaccuccggacagcaac  | 0 | 220 | 215 | 5  | 8  | 4 | 7 | 75  | 66  | 74  |
| scaffold139530_1004362 | 24 | aaaugcauuuagcaucacuuggac | 0 | 220 | 218 | 7  | 5  | 4 | 8 | 150 | 35  | 33  |
| scaffold46255_341429   | 24 | auuuuauauaucuauuucuggacc | 0 | 220 | 218 | 12 | 4  | 2 | 6 | 76  | 74  | 68  |
| C15571549_4374996      | 23 | uaaaugcauuuagcaccuucugg  | 0 | 220 | 219 | 8  | 5  | 4 | 6 | 74  | 44  | 101 |



|                        |    |                           |   |     |     |   |   |   |    |     |     |     |
|------------------------|----|---------------------------|---|-----|-----|---|---|---|----|-----|-----|-----|
| C14564356_4079148      | 21 | cugcaauaugaacuuugcacc     | 0 | 220 | 220 | 6 | 6 | 3 | 6  | 100 | 52  | 68  |
| scaffold374632_2687139 | 23 | uaaaugcauuuagcaccuucugg   | 0 | 219 | 219 | 8 | 5 | 4 | 6  | 74  | 44  | 101 |
| C16216587_4615185      | 23 | uaaaugcauuuagcaccuucugg   | 0 | 219 | 219 | 8 | 5 | 4 | 6  | 74  | 44  | 101 |
| C16701248_4842798      | 23 | uaaaugcauuuagcaccuucugg   | 0 | 219 | 219 | 8 | 5 | 4 | 6  | 74  | 44  | 101 |
| scaffold199934_1429358 | 23 | uaaaugcauuuagcaccuucugg   | 0 | 219 | 219 | 8 | 5 | 4 | 6  | 74  | 44  | 101 |
| scaffold13498_106944   | 23 | uaaaugcauuuagcaccuucuga   | 0 | 219 | 219 | 8 | 5 | 3 | 7  | 87  | 51  | 81  |
| scaffold81846_595209   | 23 | uaaaugcauuuagcaccuucuga   | 0 | 219 | 219 | 8 | 5 | 3 | 7  | 71  | 52  | 96  |
| scaffold221063_1581022 | 23 | uaaaugcauuuagcaccuucuga   | 0 | 217 | 209 | 8 | 5 | 3 | 7  | 80  | 48  | 81  |
| C14963116_4188338      | 24 | uaaucuguccagacuauacucggc  | 0 | 217 | 210 | 7 | 7 | 4 | 6  | 106 | 54  | 50  |
| scaffold40525_301660   | 24 | aaccgaguuguaggcuuguacacu  | 0 | 217 | 214 | 7 | 5 | 6 | 6  | 55  | 44  | 115 |
| scaffold326093_2329978 | 23 | uaaaugcauuuagcaccuucugg   | 0 | 215 | 173 | 8 | 5 | 4 | 6  | 59  | 39  | 75  |
| scaffold430720_3168237 | 24 | aaaugcauuuagcaucacuuggac  | 0 | 215 | 214 | 7 | 5 | 4 | 8  | 145 | 36  | 33  |
| C15987837_4522004      | 20 | ugauuguagauaaccuuggc      | 0 | 214 | 185 | 7 | 3 | 5 | 5  | 77  | 52  | 56  |
| scaffold361876_2591366 | 24 | acaagucacucgguccuaaggaac  | 0 | 214 | 198 | 4 | 7 | 5 | 8  | 88  | 48  | 62  |
| scaffold273479_1956405 | 24 | uacggauuuguaccaaauccaccc  | 0 | 214 | 210 | 6 | 8 | 3 | 7  | 70  | 56  | 84  |
| scaffold40695_303062   | 24 | aaaauagacgcgagauuauucugac | 0 | 214 | 213 | 5 | 4 | 5 | 10 | 134 | 36  | 43  |
| C12764445_3629057      | 24 | guaugcgaugcaugauuacugccc  | 0 | 213 | 196 | 7 | 6 | 6 | 5  | 58  | 72  | 66  |
| scaffold116004_838699  | 24 | agagugaucacuaggccuuggcuc  | 0 | 213 | 213 | 5 | 6 | 8 | 5  | 91  | 76  | 46  |
| C13208615_3737969      | 23 | uaaaugcauuuagcaccuucuga   | 0 | 212 | 212 | 8 | 5 | 3 | 7  | 68  | 50  | 94  |
| scaffold171528_1227591 | 23 | uaaaugcauuuagcaccuucuga   | 0 | 211 | 210 | 8 | 5 | 3 | 7  | 81  | 48  | 81  |
| C15772617_4442641      | 23 | uaaaugcauuuagcaccuucugg   | 0 | 211 | 211 | 8 | 5 | 4 | 6  | 67  | 42  | 102 |
| scaffold427993_3140577 | 24 | auccgagaucaacuuccuugaac   | 0 | 210 | 206 | 7 | 7 | 3 | 7  | 110 | 78  | 18  |
| scaffold141941_1020857 | 24 | uacggauuuguaccaaauccaccc  | 0 | 210 | 209 | 6 | 8 | 3 | 7  | 70  | 56  | 83  |
| scaffold37300_277667   | 24 | uucgguaaccgaaccguggccacc  | 0 | 210 | 210 | 4 | 9 | 6 | 5  | 66  | 71  | 73  |
| scaffold198061_1416239 | 23 | uaaaugcauuuagcaccuucugg   | 0 | 209 | 208 | 8 | 5 | 4 | 6  | 65  | 42  | 101 |
| scaffold43789_323882   | 22 | caggccccacagcuuuagacgc    | 0 | 209 | 208 | 3 | 9 | 5 | 5  | 38  | 161 | 9   |

|                        |    |                          |   |     |     |   |    |   |   |    |     |     |
|------------------------|----|--------------------------|---|-----|-----|---|----|---|---|----|-----|-----|
| C16201961_4608988      | 23 | aaaugcauuuagcaccucuggac  | 0 | 208 | 195 | 5 | 7  | 4 | 7 | 62 | 58  | 75  |
| C15532109_4361014      | 23 | uaaaugcauuuagcaccuucuga  | 0 | 208 | 208 | 8 | 5  | 3 | 7 | 68 | 48  | 92  |
| scaffold142568_1025252 | 23 | uaaaugcauuuagcaccuucuga  | 0 | 207 | 177 | 8 | 5  | 3 | 7 | 68 | 38  | 71  |
| scaffold136917_986032  | 23 | uaaaugcauuuagcaccuucuga  | 0 | 206 | 205 | 8 | 5  | 3 | 7 | 79 | 38  | 88  |
| scaffold173094_1238528 | 23 | uaaaugcauuuagcaccucugg   | 0 | 206 | 205 | 7 | 6  | 4 | 6 | 53 | 66  | 86  |
| scaffold164129_1176542 | 23 | uaaaugcauuuagcaccuucuga  | 0 | 206 | 206 | 8 | 5  | 3 | 7 | 80 | 45  | 81  |
| C17426050_5372950      | 24 | aguggaugugaauggaauuuagu  | 0 | 205 | 161 | 9 | 0  | 8 | 7 | 69 | 29  | 63  |
| C16282533_4642044      | 23 | aaaugcauuuagcaccucuggac  | 0 | 205 | 192 | 5 | 7  | 4 | 7 | 61 | 56  | 75  |
| scaffold386834_2780967 | 24 | gguuucggccgauacuugaacca  | 0 | 205 | 201 | 7 | 6  | 6 | 5 | 99 | 53  | 49  |
| C13865721_3906204      | 23 | uaaaugcauuuagcaccuucuga  | 0 | 205 | 205 | 8 | 5  | 3 | 7 | 79 | 38  | 88  |
| scaffold430934_3170461 | 24 | augauuuuggagugcuagaguacu | 0 | 204 | 190 | 9 | 2  | 7 | 6 | 99 | 32  | 59  |
| scaffold393193_2832948 | 24 | auuuagcaccucuggacagcaac  | 0 | 204 | 204 | 5 | 8  | 4 | 7 | 71 | 63  | 70  |
| scaffold449143_3390121 | 24 | ccggucaaccggaccgugaacacc | 0 | 204 | 204 | 2 | 10 | 6 | 6 | 49 | 104 | 51  |
| C13256083_3749985      | 24 | ucauauugcagugaaauauggacu | 0 | 203 | 150 | 8 | 3  | 5 | 8 | 54 | 34  | 62  |
| C17431376_5380281      | 24 | ugaugaaaauucguugcuaaagac | 0 | 203 | 189 | 7 | 3  | 5 | 9 | 94 | 29  | 66  |
| scaffold189563_1353386 | 23 | uaaaugcauuuagcaccuucugg  | 0 | 203 | 203 | 8 | 5  | 4 | 6 | 65 | 39  | 99  |
| scaffold189315_1351716 | 24 | accgagaccuuuugaguuaaaac  | 0 | 202 | 198 | 6 | 5  | 4 | 9 | 56 | 64  | 78  |
| C13670413_3856062      | 24 | cgguuucggccgauacuugaacc  | 0 | 202 | 199 | 7 | 7  | 6 | 4 | 99 | 53  | 47  |
| C15083624_4223395      | 23 | uaaaugcauuuagcaccuucuga  | 0 | 202 | 202 | 8 | 5  | 3 | 7 | 78 | 37  | 87  |
| scaffold393849_2838178 | 24 | gcuuuugcgucguaaaaacacacc | 0 | 202 | 202 | 6 | 7  | 4 | 7 | 84 | 61  | 57  |
| scaffold393849_2838179 | 24 | gcuuuugcgucguaaaaacacacc | 0 | 202 | 202 | 6 | 7  | 4 | 7 | 84 | 61  | 57  |
| C15987261_4521796      | 22 | auggccacucagucgacugaug   | 0 | 202 | 202 | 5 | 6  | 6 | 5 | 65 | 65  | 72  |
| scaffold59382_437272   | 24 | aaugcaccggaucccaucagaacu | 0 | 201 | 199 | 4 | 8  | 4 | 8 | 43 | 34  | 122 |
| scaffold73993_540073   | 24 | aauguccaacacuagauggugc   | 0 | 201 | 201 | 6 | 5  | 5 | 8 | 90 | 53  | 58  |
| C16736462_4862092      | 24 | auuucacugcaauguacuauugc  | 0 | 200 | 140 | 9 | 5  | 4 | 6 | 68 | 27  | 45  |
| scaffold50794_375243   | 24 | uacggugguacuuguacggucac  | 0 | 200 | 195 | 7 | 6  | 7 | 4 | 94 | 63  | 38  |

|                        |    |                          |   |     |     |   |   |   |    |     |     |    |
|------------------------|----|--------------------------|---|-----|-----|---|---|---|----|-----|-----|----|
| scaffold345983_2473586 | 24 | ggugagacucgaacuccgguugcc | 0 | 199 | 159 | 5 | 7 | 8 | 4  | 62  | 61  | 36 |
| C17362256_5313341      | 24 | cgguuucggccgauacuugaacc  | 0 | 198 | 198 | 7 | 7 | 6 | 4  | 99  | 52  | 47 |
| scaffold67199_493083   | 24 | uguggaacauagucaucagcugac | 0 | 197 | 190 | 6 | 5 | 6 | 7  | 106 | 37  | 47 |
| scaffold110330_799090  | 24 | auguugacucagccuuauugcacc | 0 | 197 | 197 | 8 | 7 | 4 | 5  | 44  | 79  | 74 |
| scaffold274709_1964645 | 24 | gcuuuugcgucguaaaaacacacc | 0 | 196 | 195 | 6 | 7 | 4 | 7  | 78  | 62  | 55 |
| C14863760_4160088      | 24 | accuuaggagacguacauugauc  | 0 | 196 | 195 | 6 | 6 | 5 | 7  | 65  | 128 | 2  |
| scaffold328774_2348884 | 22 | uccucaugaauagcuguagc     | 0 | 196 | 196 | 7 | 6 | 4 | 5  | 94  | 91  | 11 |
| scaffold76676_559546   | 23 | uaaaugcauuagcaccuucugg   | 0 | 195 | 157 | 8 | 5 | 4 | 6  | 51  | 36  | 70 |
| C15086472_4223633      | 23 | aaaugcauuagcaccuccuggac  | 0 | 195 | 195 | 5 | 7 | 4 | 7  | 62  | 58  | 75 |
| scaffold21763_162513   | 24 | cgcugcgugaaccuuucugggc   | 0 | 194 | 156 | 7 | 7 | 7 | 3  | 64  | 77  | 15 |
| scaffold18813_140933   | 24 | cgcugcgugaaccuuucugggc   | 0 | 193 | 151 | 7 | 7 | 7 | 3  | 58  | 77  | 16 |
| C15968601_4514809      | 22 | cgcaucauuuggacgugaaucg   | 0 | 193 | 193 | 6 | 5 | 6 | 5  | 68  | 52  | 73 |
| C16341937_4669537      | 23 | uaaaugcauuagcaccuucugg   | 0 | 192 | 192 | 8 | 5 | 4 | 6  | 64  | 46  | 82 |
| scaffold155247_1114327 | 23 | uaaaugcauuagcaccuucugg   | 0 | 192 | 192 | 8 | 5 | 4 | 6  | 64  | 46  | 82 |
| C13842059_3900104      | 24 | agacggaugacaaaugaaaac    | 0 | 191 | 190 | 2 | 4 | 5 | 13 | 105 | 38  | 47 |
| C14371195_4028623      | 24 | cgcugcgugaaccuuucugggc   | 0 | 190 | 151 | 7 | 7 | 7 | 3  | 58  | 77  | 16 |
| scaffold73921_539528   | 23 | uaaaugcauuagcaccuucugg   | 0 | 190 | 188 | 8 | 5 | 4 | 6  | 64  | 47  | 77 |
| scaffold450704_3413685 | 24 | gauccaaucauuagacuguguggu | 0 | 189 | 188 | 9 | 4 | 6 | 5  | 59  | 47  | 82 |
| scaffold16666_127958   | 23 | uaaaugcauuagcaccuucugg   | 0 | 189 | 188 | 8 | 5 | 4 | 6  | 64  | 47  | 77 |
| C12570875_3582469      | 23 | uaaaugcauuagcaccuucugg   | 0 | 189 | 189 | 8 | 5 | 4 | 6  | 64  | 47  | 78 |
| scaffold329999_2357831 | 24 | ucgguugaccgcccgugaacacc  | 0 | 189 | 189 | 4 | 9 | 6 | 5  | 39  | 74  | 76 |
| scaffold399281_2882689 | 24 | augccuuauucgguugucaagaac | 0 | 188 | 181 | 8 | 5 | 5 | 6  | 85  | 49  | 47 |
| scaffold377670_2709621 | 23 | aaggaccgaguauaugugcacau  | 0 | 188 | 186 | 5 | 4 | 6 | 8  | 80  | 53  | 53 |
| scaffold105478_763610  | 23 | caugaucgaucaggcuuugccc   | 0 | 188 | 188 | 7 | 7 | 5 | 4  | 84  | 69  | 35 |
| scaffold207729_1487409 | 24 | acccacagacauggaccgucug   | 0 | 187 | 117 | 3 | 9 | 5 | 7  | 17  | 14  | 86 |
| scaffold377670_2709622 | 23 | aaggaccgaguauaugugcacau  | 0 | 186 | 186 | 5 | 4 | 6 | 8  | 80  | 53  | 53 |

|                        |    |                           |   |     |     |    |   |   |    |    |    |     |
|------------------------|----|---------------------------|---|-----|-----|----|---|---|----|----|----|-----|
| scaffold377670_2709623 | 23 | aaggaccgaguauaugugcacau   | 0 | 186 | 186 | 5  | 4 | 6 | 8  | 80 | 53 | 53  |
| scaffold153351_1100799 | 24 | aaaugcauuuagcaccuccugaac  | 0 | 186 | 186 | 5  | 8 | 3 | 8  | 66 | 60 | 60  |
| scaffold357275_2557455 | 24 | uaaccgcuaaacucgaaaugacc   | 0 | 185 | 178 | 5  | 8 | 3 | 8  | 70 | 61 | 47  |
| C17416472_5361757      | 21 | uaaaggagagacuagaccu       | 0 | 185 | 185 | 5  | 3 | 6 | 7  | 69 | 40 | 76  |
| C15682305_4411531      | 21 | auauaccugaaauuuuauucc     | 0 | 184 | 180 | 9  | 5 | 1 | 6  | 94 | 31 | 55  |
| C13818209_3894241      | 24 | auuuuaauuuccuggcucaccccc  | 0 | 184 | 182 | 8  | 8 | 3 | 5  | 53 | 52 | 77  |
| scaffold19778_148557   | 24 | cguacggauuggcucuuuuggcac  | 0 | 183 | 87  | 7  | 6 | 7 | 4  | 35 | 33 | 19  |
| C12930555_3669526      | 22 | acuggaauaucuuuauugac      | 0 | 183 | 179 | 7  | 4 | 4 | 7  | 98 | 67 | 14  |
| C16955723_4992168      | 21 | augugcauguuaccuuggucc     | 0 | 183 | 183 | 8  | 5 | 5 | 3  | 0  | 0  | 183 |
| C15822131_4460422      | 24 | auuuuacugcaauaugaacuuggc  | 0 | 183 | 183 | 10 | 4 | 3 | 7  | 96 | 30 | 57  |
| scaffold102736_744342  | 24 | auuucacugcaaugugaacuuggc  | 0 | 182 | 182 | 9  | 5 | 4 | 6  | 68 | 43 | 71  |
| scaffold102743_744605  | 24 | uuuuuggcauaccgguccggcacc  | 0 | 181 | 180 | 7  | 8 | 6 | 3  | 51 | 51 | 78  |
| C15126016_4234888      | 24 | gggauuucauacucgauugagagc  | 0 | 181 | 181 | 7  | 4 | 7 | 6  | 82 | 26 | 73  |
| scaffold55506_409168   | 22 | uauggacagguguuugagcgcc    | 0 | 180 | 173 | 6  | 4 | 8 | 4  | 20 | 13 | 140 |
| scaffold234618_1678744 | 23 | uaaaugcauuuagcaccuucuga   | 0 | 180 | 174 | 8  | 5 | 3 | 7  | 67 | 38 | 69  |
| scaffold156647_1124618 | 24 | ucgguaaacugaaccgugcacacc  | 0 | 180 | 179 | 5  | 8 | 5 | 6  | 82 | 73 | 24  |
| scaffold94291_685465   | 24 | uuuuuggcauaccgguccggcacc  | 0 | 180 | 180 | 7  | 8 | 6 | 3  | 51 | 51 | 78  |
| scaffold357919_2562109 | 23 | aaccgaaugaaggucccgagagc   | 0 | 179 | 101 | 2  | 6 | 7 | 8  | 45 | 36 | 20  |
| scaffold40942_305156   | 24 | aaauaaauaccaggauuaauagucc | 0 | 178 | 177 | 7  | 4 | 3 | 10 | 74 | 52 | 51  |
| C15080362_4221817      | 24 | auugcuuugguccaggauaaugcc  | 0 | 177 | 166 | 8  | 5 | 6 | 5  | 59 | 46 | 61  |
| scaffold133809_964250  | 23 | uaaaugcauuuagcaccuucugg   | 0 | 177 | 174 | 8  | 5 | 4 | 6  | 61 | 40 | 73  |
| C12747595_3625026      | 23 | uaaaugcauuuagcaccuucuga   | 0 | 177 | 176 | 8  | 5 | 3 | 7  | 68 | 37 | 71  |
| scaffold142568_1025251 | 23 | uaaaugcauuuagcaccuucuga   | 0 | 177 | 177 | 8  | 5 | 3 | 7  | 68 | 38 | 71  |
| scaffold28118_210117   | 24 | uuacugcaaaagugaacuugcacc  | 0 | 177 | 177 | 6  | 6 | 4 | 8  | 50 | 59 | 68  |
| C16784469_4888382      | 24 | ucgguaaacgaaccgugcacacc   | 0 | 177 | 177 | 4  | 9 | 5 | 6  | 34 | 71 | 72  |
| scaffold301687_2155832 | 24 | ugucgggagacacauguauugccc  | 0 | 176 | 168 | 5  | 6 | 8 | 5  | 71 | 63 | 34  |

|                        |    |                          |   |     |     |   |   |    |   |    |    |     |
|------------------------|----|--------------------------|---|-----|-----|---|---|----|---|----|----|-----|
| scaffold142898_1027457 | 23 | uaaaugcauuuagcaccuucugg  | 0 | 176 | 170 | 8 | 5 | 4  | 6 | 56 | 39 | 75  |
| scaffold85903_626768   | 23 | uaaaugcauuuagcaccuucugg  | 0 | 176 | 174 | 8 | 5 | 4  | 6 | 61 | 40 | 73  |
| scaffold85903_626769   | 23 | uaaaugcauuuagcaccuucugg  | 0 | 176 | 174 | 8 | 5 | 4  | 6 | 61 | 40 | 73  |
| C12843883_3648432      | 23 | gaagcuggucgugagcuccaga   | 0 | 176 | 176 | 4 | 6 | 8  | 5 | 40 | 36 | 100 |
| C12733861_3621753      | 22 | cugacuggaugccacguggcgc   | 0 | 175 | 143 | 4 | 7 | 8  | 3 | 49 | 66 | 28  |
| scaffold405584_2934793 | 24 | ucgguaaacgaaccgugcacacc  | 0 | 175 | 174 | 4 | 9 | 5  | 6 | 34 | 69 | 71  |
| scaffold185021_1321565 | 24 | ucgguaaacgaaccgugcacacc  | 0 | 175 | 174 | 4 | 9 | 5  | 6 | 34 | 69 | 71  |
| scaffold353296_2528592 | 21 | ugugguggucguguucguc      | 0 | 175 | 175 | 9 | 3 | 9  | 0 | 96 | 78 | 1   |
| scaffold120501_870276  | 23 | uaaaugcauuuagcaccuucugg  | 0 | 174 | 156 | 8 | 5 | 4  | 6 | 46 | 33 | 77  |
| C14269715_4003251      | 21 | ugugcgucuuuagccaucuccu   | 0 | 174 | 174 | 8 | 7 | 4  | 2 | 41 | 44 | 89  |
| scaffold323863_2313562 | 21 | ugugcgucuuuagccaucuccu   | 0 | 174 | 174 | 8 | 7 | 4  | 2 | 41 | 44 | 89  |
| scaffold271506_1941864 | 22 | auguacaacucauuuagcacc    | 0 | 173 | 152 | 6 | 6 | 2  | 8 | 49 | 40 | 63  |
| C15619087_4390720      | 23 | uaaaugcauuuagcaccuucugg  | 0 | 173 | 172 | 8 | 5 | 4  | 6 | 57 | 39 | 76  |
| scaffold21420_160093   | 24 | auuaauacugggauaucucaugcu | 0 | 173 | 173 | 9 | 4 | 4  | 7 | 74 | 30 | 69  |
| scaffold137357_989099  | 23 | uaaaugcauuuagcaccuucugg  | 0 | 172 | 171 | 8 | 5 | 4  | 6 | 56 | 38 | 77  |
| scaffold116744_844842  | 23 | uaaaugcauuuagcaccuucugg  | 0 | 172 | 171 | 8 | 5 | 4  | 6 | 57 | 39 | 75  |
| scaffold133809_964249  | 23 | uaaaugcauuuagcaccuucugg  | 0 | 172 | 171 | 8 | 5 | 4  | 6 | 57 | 39 | 75  |
| scaffold102459_742494  | 23 | uaaaugcauuuagcaccuucugg  | 0 | 172 | 172 | 8 | 5 | 4  | 6 | 57 | 39 | 76  |
| scaffold197435_1410992 | 21 | gcaccagauuggauuagcuuc    | 0 | 172 | 172 | 6 | 6 | 5  | 4 | 41 | 53 | 78  |
| scaffold107759_780397  | 21 | uuacugcaauaugaacuuugc    | 0 | 171 | 138 | 8 | 4 | 3  | 6 | 66 | 35 | 37  |
| C17268411_5229944      | 24 | ggguagccgaggaagagcgugagc | 0 | 171 | 153 | 2 | 4 | 12 | 6 | 49 | 66 | 38  |
| scaffold233261_1668764 | 22 | ugaucaggagccuuacucacc    | 0 | 171 | 168 | 5 | 8 | 4  | 5 | 61 | 91 | 16  |
| C15455759_4336309      | 24 | agcauuuccauaaggaccuuaac  | 0 | 171 | 170 | 6 | 7 | 3  | 8 | 48 | 42 | 80  |
| C16874275_4943111      | 23 | uaaaugcauuuagcaccuucugg  | 0 | 171 | 171 | 8 | 5 | 4  | 6 | 57 | 39 | 75  |
| scaffold152420_1094172 | 23 | uaaaugcauuuagcaccuucugg  | 0 | 171 | 171 | 8 | 5 | 4  | 6 | 57 | 39 | 75  |
| scaffold63265_464471   | 23 | uaaaugcauuuagcaccuucugg  | 0 | 170 | 169 | 8 | 5 | 4  | 6 | 58 | 36 | 75  |

|                        |    |                          |   |     |     |    |   |   |   |     |    |    |
|------------------------|----|--------------------------|---|-----|-----|----|---|---|---|-----|----|----|
| scaffold98641_715452   | 22 | ucggcugucuauuuaguaaacc   | 0 | 169 | 82  | 8  | 5 | 4 | 5 | 41  | 41 | 0  |
| scaffold429527_3156467 | 24 | agcaacggaaucuaguacggacc  | 0 | 169 | 154 | 4  | 6 | 6 | 8 | 114 | 31 | 9  |
| scaffold4305_32649     | 20 | uuuagcaccuccugacagc      | 0 | 168 | 83  | 4  | 8 | 4 | 4 | 18  | 37 | 28 |
| C15676819_4409689      | 23 | uaaaugcauuuagcaccuucugg  | 0 | 168 | 124 | 8  | 5 | 4 | 6 | 35  | 28 | 61 |
| scaffold317459_2268125 | 24 | auuuuuuuuaagaaacucacucu  | 0 | 168 | 159 | 10 | 4 | 1 | 9 | 45  | 26 | 88 |
| scaffold367894_2637492 | 24 | caggcccaagugaucacucuggcc | 0 | 168 | 160 | 4  | 9 | 6 | 5 | 77  | 45 | 38 |
| scaffold456751_3526642 | 23 | agaggcggaccaggauucucc    | 0 | 168 | 165 | 4  | 7 | 7 | 5 | 47  | 43 | 75 |
| scaffold120501_870275  | 23 | uaaaugcauuuagcaccuucugg  | 0 | 167 | 156 | 8  | 5 | 4 | 6 | 46  | 33 | 77 |
| scaffold146189_1049853 | 24 | aguaggacggucagaaguuggcac | 0 | 167 | 162 | 4  | 4 | 9 | 7 | 54  | 56 | 52 |
| scaffold272037_1945477 | 24 | uccguacggaccggaccuuuagc  | 0 | 167 | 163 | 5  | 8 | 7 | 4 | 48  | 74 | 41 |
| scaffold25404_190352   | 23 | uaaaugcauuuagcaccuucugg  | 0 | 166 | 157 | 8  | 5 | 4 | 6 | 51  | 35 | 71 |
| scaffold120087_867694  | 23 | uaaaugcauuuagcaccuucugg  | 0 | 166 | 158 | 8  | 5 | 4 | 6 | 51  | 36 | 71 |
| scaffold229421_1640758 | 24 | aguuuuaguaagugcacucaccuc | 0 | 166 | 166 | 8  | 6 | 4 | 6 | 54  | 64 | 48 |
| C12824923_3644126      | 23 | uaaaugcauuuagcaccuucugg  | 0 | 165 | 162 | 8  | 5 | 4 | 6 | 50  | 39 | 73 |
| C15718347_4423920      | 24 | guggaauccagucucgaguugagc | 0 | 164 | 62  | 6  | 5 | 8 | 5 | 15  | 27 | 20 |
| scaffold116920_845864  | 20 | agcugccgacucauucauuu     | 0 | 164 | 91  | 7  | 6 | 3 | 4 | 17  | 32 | 42 |
| scaffold13785_103644   | 23 | ugaauaugugagacaggacaccu  | 0 | 164 | 162 | 5  | 4 | 6 | 8 | 53  | 32 | 77 |
| scaffold242799_1735827 | 24 | gauacacagugcaucgucuggcc  | 0 | 164 | 164 | 6  | 7 | 6 | 5 | 71  | 51 | 42 |
| C16732054_4858958      | 24 | auuaaggguggugauguuggcacc | 0 | 163 | 162 | 7  | 3 | 9 | 5 | 40  | 69 | 53 |
| C12942517_3672486      | 23 | uaaaugcauuuagcaccucugg   | 0 | 163 | 163 | 7  | 6 | 4 | 6 | 43  | 50 | 70 |
| scaffold257608_1841611 | 24 | uuuuuggcauaccgguccggcacc | 0 | 161 | 161 | 7  | 8 | 6 | 3 | 46  | 42 | 73 |
| C16318885_4658223      | 24 | caaccagaaggugcuauuagcauu | 0 | 160 | 136 | 5  | 5 | 5 | 9 | 44  | 41 | 51 |
| C14957822_4186757      | 24 | uaacaacacucggcugcucuaac  | 0 | 159 | 53  | 5  | 9 | 3 | 7 | 22  | 17 | 14 |
| scaffold142_1093       | 24 | cgcugcgugaaccuuucugggc   | 0 | 159 | 151 | 7  | 7 | 7 | 3 | 58  | 77 | 16 |
| scaffold173899_1244116 | 23 | agaauacucugccacacuugcug  | 0 | 159 | 158 | 6  | 7 | 4 | 6 | 45  | 47 | 66 |
| scaffold373626_2679603 | 24 | agguccaaguaguacaauuugccc | 0 | 159 | 158 | 6  | 6 | 5 | 7 | 69  | 67 | 22 |

|                        |    |                           |   |     |     |    |   |    |   |    |    |     |
|------------------------|----|---------------------------|---|-----|-----|----|---|----|---|----|----|-----|
| scaffold239242_1710025 | 21 | accagcggcaggauccggcgac    | 0 | 159 | 159 | 1  | 7 | 8  | 5 | 0  | 0  | 159 |
| scaffold368706_2644901 | 24 | uaaccaaugcacugaugucacauc  | 0 | 158 | 140 | 6  | 7 | 3  | 8 | 67 | 45 | 28  |
| scaffold158096_1134375 | 24 | gggccuguuggaacuuggauggcc  | 0 | 158 | 149 | 6  | 5 | 10 | 3 | 68 | 40 | 41  |
| scaffold161004_1154478 | 24 | acgagacgcacuuugaccaaugug  | 0 | 158 | 152 | 5  | 6 | 6  | 7 | 57 | 21 | 74  |
| C13564359_3828188      | 24 | aucgaucauggauaugccuauugau | 0 | 158 | 158 | 8  | 4 | 5  | 7 | 25 | 17 | 116 |
| scaffold78486_571257   | 23 | uaaaugcauuuagcaccuucugg   | 0 | 158 | 158 | 8  | 5 | 4  | 6 | 51 | 35 | 72  |
| scaffold441109_3282152 | 24 | aagguuuacucgguuccuaggaac  | 0 | 157 | 104 | 7  | 5 | 6  | 6 | 53 | 18 | 33  |
| C16402222_4695201      | 24 | gcacauuacucgguacaauagggc  | 0 | 157 | 156 | 5  | 6 | 6  | 7 | 55 | 33 | 68  |
| scaffold56274_415005   | 24 | auugguccguaggaaaugcacc    | 0 | 157 | 157 | 6  | 5 | 7  | 6 | 46 | 32 | 79  |
| scaffold297087_2123187 | 24 | uuucauaaucguuagacuugccc   | 0 | 156 | 156 | 10 | 6 | 3  | 5 | 47 | 54 | 55  |
| scaffold458763_3576963 | 24 | cgcugcgugaaccuuucugggc    | 0 | 156 | 156 | 7  | 7 | 7  | 3 | 64 | 77 | 15  |
| scaffold7566_56839     | 24 | agccuugcucagucgauugauggc  | 0 | 155 | 121 | 7  | 6 | 7  | 4 | 39 | 31 | 51  |
| scaffold113037_818228  | 20 | ugagaugaucuuguuuug        | 0 | 155 | 153 | 9  | 2 | 5  | 4 | 57 | 69 | 27  |
| scaffold8041_60272     | 24 | agcuuugcucagucgacugauggc  | 0 | 154 | 150 | 7  | 6 | 7  | 4 | 83 | 29 | 38  |
| scaffold450916_3417218 | 24 | uuuuugcacccauuccgcaugcac  | 0 | 153 | 126 | 7  | 9 | 3  | 5 | 52 | 37 | 37  |
| scaffold455507_3499438 | 24 | augcauuggucgguauguggguc   | 0 | 153 | 141 | 8  | 3 | 10 | 3 | 82 | 17 | 42  |
| scaffold83688_608539   | 22 | acgaaugagccacuauuguaug    | 0 | 153 | 152 | 6  | 4 | 5  | 7 | 54 | 64 | 34  |
| C16162555_4591404      | 24 | auugaacagucacuuucugacac   | 0 | 153 | 153 | 7  | 6 | 4  | 7 | 57 | 53 | 43  |
| C13967319_3929615      | 24 | uuuacaccagguguaacuugaacc  | 0 | 153 | 153 | 7  | 6 | 4  | 7 | 57 | 60 | 36  |
| scaffold394733_2845367 | 24 | ucuacuuccuguuugguuucgauc  | 0 | 152 | 150 | 12 | 6 | 4  | 2 | 38 | 55 | 57  |
| scaffold316101_2257973 | 24 | aaaaguccagguaggccauggcc   | 0 | 152 | 151 | 3  | 6 | 8  | 7 | 70 | 42 | 39  |
| scaffold60361_443737   | 21 | cgugguggucgcuugcuguc      | 0 | 152 | 152 | 7  | 5 | 9  | 0 | 85 | 67 | 0   |
| scaffold261822_1871573 | 24 | ugucaggagacacaugaugccc    | 0 | 151 | 107 | 5  | 6 | 7  | 6 | 44 | 38 | 25  |
| C16797937_4895948      | 24 | ggcgcauuggcacaagacuugaac  | 0 | 151 | 136 | 4  | 6 | 7  | 7 | 48 | 41 | 47  |
| scaffold351501_2514968 | 24 | gcaaugaggcggcugucuagagc   | 0 | 151 | 148 | 5  | 5 | 9  | 5 | 55 | 45 | 48  |
| C13106341_3712921      | 24 | ucauuugcagugaaauauggacu   | 0 | 151 | 150 | 8  | 3 | 5  | 8 | 54 | 34 | 62  |

|                        |    |                           |   |     |     |   |   |   |    |     |    |    |
|------------------------|----|---------------------------|---|-----|-----|---|---|---|----|-----|----|----|
| C17084556_5081999      | 23 | aaucgagauuaguguuggacacu   | 0 | 150 | 144 | 7 | 3 | 6 | 7  | 97  | 39 | 8  |
| scaffold305903_2185077 | 24 | auguuuacucgguccuuaggaacc  | 0 | 150 | 146 | 8 | 6 | 5 | 5  | 76  | 38 | 32 |
| C15639937_4397038      | 24 | aaagauugguccucuaaagaaccu  | 0 | 150 | 149 | 8 | 5 | 4 | 7  | 78  | 31 | 40 |
| scaffold410998_2982689 | 24 | aguuaggcuauaaagagggauucc  | 0 | 150 | 149 | 6 | 3 | 7 | 8  | 62  | 39 | 48 |
| C16678330_4830065      | 24 | augaaaacuugguagagaugaucuc | 0 | 150 | 150 | 7 | 3 | 6 | 8  | 104 | 28 | 18 |
| scaffold456751_3526612 | 21 | augaagagguuucuacuugcac    | 0 | 149 | 146 | 6 | 4 | 5 | 6  | 47  | 69 | 30 |
| scaffold346922_2481073 | 24 | caaccagaaggugcuaaaugcauu  | 0 | 148 | 134 | 5 | 5 | 5 | 9  | 45  | 39 | 50 |
| scaffold280898_2008308 | 24 | auuggcacuauaucgacauugage  | 0 | 148 | 145 | 7 | 5 | 5 | 7  | 76  | 57 | 12 |
| C14420042_4041231      | 24 | aaaguccagguggagccauggccc  | 0 | 148 | 148 | 3 | 7 | 8 | 6  | 55  | 41 | 52 |
| scaffold293649_2099023 | 24 | caaccagaaggugcuaaaugcauu  | 0 | 147 | 136 | 5 | 5 | 5 | 9  | 44  | 41 | 51 |
| scaffold73762_545373   | 24 | agucgagaggguucuguagacacc  | 0 | 146 | 144 | 4 | 6 | 8 | 6  | 68  | 35 | 41 |
| scaffold99728_723445   | 23 | agcuuacucgguccuaaggaacc   | 0 | 146 | 145 | 5 | 7 | 5 | 6  | 68  | 37 | 40 |
| scaffold414778_3015895 | 24 | auaaguuccagacaauugaauugc  | 0 | 145 | 140 | 7 | 4 | 4 | 9  | 45  | 50 | 45 |
| C16747390_4867269      | 24 | uauuugaauucgguggcaaguugcc | 0 | 145 | 144 | 9 | 4 | 7 | 4  | 49  | 42 | 53 |
| scaffold300456_2146831 | 24 | gcccuuaggauacacguuaacaug  | 0 | 144 | 128 | 6 | 6 | 5 | 7  | 44  | 39 | 45 |
| scaffold355785_2613549 | 24 | uuuacauguaaaaacguuggacc   | 0 | 144 | 143 | 7 | 5 | 4 | 8  | 62  | 31 | 50 |
| scaffold45390_335714   | 23 | gaagcuggucgugagcuccaga    | 0 | 144 | 144 | 4 | 6 | 8 | 5  | 30  | 29 | 85 |
| scaffold153523_1101944 | 24 | agugggccuuaggguuucaagcc   | 0 | 143 | 87  | 6 | 5 | 8 | 5  | 37  | 29 | 21 |
| scaffold118124_855109  | 24 | aagagauuccggugaaccguccac  | 0 | 143 | 142 | 4 | 7 | 6 | 7  | 50  | 36 | 56 |
| scaffold46205_341112   | 24 | acuacaauaugaacuuugcagucc  | 0 | 143 | 142 | 7 | 6 | 3 | 8  | 60  | 37 | 45 |
| scaffold302382_2160388 | 24 | uacauuguuuuaguaaacucacc   | 0 | 143 | 142 | 9 | 6 | 2 | 7  | 69  | 41 | 32 |
| scaffold286399_2047521 | 24 | ucaucagucgacugaugggcacug  | 0 | 143 | 143 | 6 | 6 | 7 | 5  | 67  | 43 | 33 |
| scaffold18159_137039   | 24 | caaccagaaggugcuaaaugcauu  | 0 | 142 | 136 | 5 | 5 | 5 | 9  | 46  | 41 | 49 |
| C12900547_3662223      | 24 | aaauccacucgguuuccuuaggacc | 0 | 142 | 138 | 7 | 8 | 4 | 5  | 54  | 30 | 54 |
| scaffold387082_2783017 | 24 | aaauccaguucaacaugauagaac  | 0 | 142 | 141 | 5 | 5 | 3 | 11 | 71  | 27 | 43 |
| C16859025_4932290      | 24 | auaaaggguugguaguuggcacc   | 0 | 142 | 141 | 6 | 3 | 9 | 6  | 30  | 69 | 42 |



|                        |    |                          |   |     |     |    |    |   |    |     |    |     |
|------------------------|----|--------------------------|---|-----|-----|----|----|---|----|-----|----|-----|
| scaffold122261_881707  | 24 | accaaauuguaaaacucauaaagu | 0 | 141 | 140 | 7  | 4  | 2 | 11 | 1   | 0  | 139 |
| C13355108_3774391      | 22 | ucggaagaauuucaggugcaac   | 0 | 140 | 138 | 5  | 4  | 6 | 7  | 100 | 34 | 4   |
| scaffold158274_1136072 | 23 | uaaaugcauuuagcaccuucugg  | 0 | 140 | 139 | 8  | 5  | 4 | 6  | 39  | 32 | 68  |
| C14663100_4105140      | 23 | uuugguucacggauuuuaguacu  | 0 | 140 | 140 | 11 | 3  | 5 | 4  | 41  | 31 | 68  |
| scaffold265721_1899806 | 24 | ucaucagucgacugaugggcacug | 0 | 140 | 140 | 6  | 6  | 7 | 5  | 65  | 43 | 32  |
| C16846919_4925268      | 24 | aaauuuugacacgacacgcuaacc | 0 | 140 | 140 | 5  | 7  | 3 | 9  | 47  | 46 | 47  |
| scaffold59276_436803   | 18 | caauacauggcuuuggcc       | 0 | 139 | 71  | 5  | 5  | 4 | 4  | 63  | 1  | 7   |
| scaffold6500_48963     | 18 | caauacauggcuuuggcc       | 0 | 139 | 71  | 5  | 5  | 4 | 4  | 63  | 1  | 7   |
| scaffold168805_1208972 | 24 | augugugugauacaucugaugccc | 0 | 139 | 138 | 8  | 5  | 6 | 5  | 39  | 54 | 45  |
| scaffold416678_3033169 | 24 | aagguuuaccgguuccuaggaac  | 0 | 138 | 111 | 7  | 5  | 6 | 6  | 56  | 17 | 38  |
| scaffold42135_312836   | 24 | cuuuagaaucaauagaacuuggc  | 0 | 137 | 127 | 8  | 4  | 4 | 8  | 68  | 31 | 28  |
| scaffold147432_1058756 | 24 | agacucauacaggcuuuggcaugc | 0 | 136 | 126 | 6  | 6  | 6 | 6  | 46  | 38 | 42  |
| C13879557_3908992      | 24 | ucagucgacugaugccuugcuc   | 0 | 136 | 135 | 7  | 7  | 6 | 4  | 45  | 27 | 63  |
| scaffold124710_897979  | 22 | uuuugauuggucgagaaaacug   | 0 | 136 | 135 | 8  | 2  | 6 | 6  | 82  | 52 | 1   |
| C13226855_3742505      | 24 | gguguagcaauacuuguagagugu | 0 | 135 | 127 | 8  | 2  | 8 | 6  | 47  | 42 | 38  |
| scaffold206360_1477473 | 24 | caaccagaaggugcuaaaugcauu | 0 | 135 | 133 | 5  | 5  | 5 | 9  | 44  | 38 | 51  |
| C13660255_3853524      | 24 | aucgaucauggacaugcccaugau | 0 | 135 | 135 | 6  | 6  | 5 | 7  | 21  | 16 | 98  |
| scaffold173919_1244183 | 24 | ccgguuaaccggaccgugcacacc | 0 | 134 | 126 | 3  | 10 | 6 | 5  | 22  | 54 | 50  |
| scaffold58370_430232   | 23 | uaaaugcauuuagcaccuucugg  | 0 | 134 | 134 | 8  | 5  | 4 | 6  | 38  | 30 | 66  |
| scaffold322037_2300752 | 18 | uuugauacgcaccugaau       | 0 | 133 | 132 | 6  | 4  | 3 | 5  | 48  | 59 | 25  |
| C14248819_3998238      | 24 | auuguuggcccacuacuuacagc  | 0 | 132 | 131 | 7  | 7  | 4 | 6  | 42  | 43 | 46  |
| scaffold187734_1341207 | 24 | caaccagaaggugcuaaaugcauu | 0 | 132 | 132 | 5  | 5  | 5 | 9  | 44  | 39 | 49  |
| scaffold454947_3488177 | 24 | gaccgguuagaacaguuuuuggcc | 0 | 132 | 132 | 7  | 6  | 6 | 5  | 64  | 48 | 20  |
| scaffold22413_166866   | 24 | gaccgguuagaacaguuuuuggcc | 0 | 132 | 132 | 7  | 6  | 6 | 5  | 64  | 48 | 20  |
| C12563469_3580736      | 22 | ugugcuuuugaacuccaggucc   | 0 | 131 | 116 | 8  | 6  | 5 | 3  | 60  | 56 | 0   |
| C14615178_4092484      | 24 | aaaugcauuuagcaccuucugguu | 0 | 131 | 128 | 9  | 5  | 4 | 6  | 36  | 28 | 64  |

|                        |    |                          |   |     |     |   |    |   |   |    |    |    |
|------------------------|----|--------------------------|---|-----|-----|---|----|---|---|----|----|----|
| C16804513_4900348      | 24 | aaaugcauuuagcaccuucugguu | 0 | 131 | 129 | 9 | 5  | 4 | 6 | 35 | 30 | 64 |
| scaffold107759_780391  | 24 | auacuguaauaugaacuuugcacc | 0 | 131 | 131 | 8 | 5  | 3 | 8 | 44 | 45 | 42 |
| scaffold28651_214618   | 22 | ccguacuugauuuucagacacc   | 0 | 130 | 53  | 7 | 7  | 3 | 5 | 24 | 29 | 0  |
| C14093065_3959676      | 23 | uaaaggucccgguccguacggac  | 0 | 130 | 118 | 4 | 7  | 7 | 5 | 34 | 40 | 44 |
| scaffold449869_3400834 | 24 | uuucauaaucauuagaccuugccc | 0 | 130 | 130 | 9 | 7  | 2 | 6 | 49 | 69 | 12 |
| C16488964_4735221      | 24 | cuugcaccaggagacugugucc   | 0 | 129 | 129 | 5 | 9  | 6 | 4 | 43 | 35 | 51 |
| scaffold46468_343009   | 24 | gaagagaucugcaggcuggucauc | 0 | 128 | 110 | 5 | 5  | 8 | 6 | 35 | 34 | 41 |
| scaffold185836_1327530 | 24 | gaaaguguuuccggaauuugugcu | 0 | 128 | 127 | 9 | 3  | 7 | 5 | 29 | 43 | 55 |
| scaffold335055_2393980 | 22 | caacccauuuauugcaccgggu   | 0 | 128 | 128 | 5 | 8  | 3 | 6 | 30 | 39 | 59 |
| scaffold293912_2100258 | 22 | caacccauuuauugcaccgggu   | 0 | 128 | 128 | 5 | 8  | 3 | 6 | 30 | 39 | 59 |
| scaffold241456_1726530 | 24 | aaucugguuaccagugcacugacc | 0 | 128 | 128 | 6 | 7  | 5 | 6 | 48 | 43 | 37 |
| scaffold190676_1362036 | 24 | cuccuuagucgacugagugagccu | 0 | 127 | 120 | 7 | 7  | 6 | 4 | 38 | 26 | 56 |
| scaffold339405_2424986 | 23 | uaaaggucccgguccguacggac  | 0 | 127 | 124 | 4 | 7  | 7 | 5 | 36 | 42 | 46 |
| C15286509_4282753      | 24 | ggguguugucagaaaucgaaaac  | 0 | 127 | 125 | 5 | 4  | 7 | 8 | 57 | 23 | 45 |
| C15630041_4394309      | 24 | aaaugcauuuagcaccuccugaac | 0 | 127 | 125 | 5 | 8  | 3 | 8 | 52 | 33 | 40 |
| C16383577_4687837      | 24 | aaaugcauuuagcaccuucugguu | 0 | 127 | 126 | 9 | 5  | 4 | 6 | 38 | 27 | 61 |
| scaffold271308_1940212 | 24 | cggucugacucuagaagguggcac | 0 | 127 | 126 | 5 | 6  | 8 | 5 | 60 | 30 | 36 |
| C12796170_3636757      | 22 | cauggagaacaaguccagggc    | 0 | 127 | 127 | 2 | 6  | 7 | 7 | 68 | 33 | 26 |
| C16410272_4698762      | 24 | uaguucucauguagaauuaggcc  | 0 | 126 | 117 | 8 | 4  | 6 | 6 | 60 | 57 | 0  |
| scaffold125925_907089  | 24 | aauuccggacagcugugauggggc | 0 | 126 | 120 | 5 | 5  | 9 | 5 | 79 | 40 | 1  |
| scaffold396038_2856054 | 24 | caucugcacucaccucuaauagg  | 0 | 126 | 124 | 7 | 9  | 3 | 5 | 12 | 48 | 64 |
| scaffold103968_752519  | 24 | uuuggguuuggacaacacagacc  | 0 | 126 | 125 | 6 | 6  | 6 | 6 | 53 | 32 | 40 |
| scaffold311553_2224643 | 24 | ccgguaaacggaccgugcacacc  | 0 | 126 | 126 | 3 | 10 | 6 | 5 | 22 | 53 | 51 |
| C16550690_4764998      | 24 | ccgguaaacggaccgugcacacc  | 0 | 126 | 126 | 3 | 10 | 6 | 5 | 22 | 54 | 50 |
| scaffold8965_67114     | 24 | cuagcuccggguugaaggauauc  | 0 | 125 | 114 | 6 | 6  | 7 | 5 | 44 | 27 | 43 |
| scaffold374230_2683943 | 20 | aaggaccaguccuacggac      | 0 | 125 | 121 | 3 | 6  | 5 | 6 | 62 | 12 | 47 |

|                        |    |                           |   |     |     |    |   |   |    |    |    |    |
|------------------------|----|---------------------------|---|-----|-----|----|---|---|----|----|----|----|
| scaffold415345_3020809 | 22 | uuugaacuugagcuauaacacc    | 0 | 125 | 123 | 7  | 5 | 3 | 7  | 66 | 57 | 0  |
| scaffold302089_2158458 | 23 | cugaguacuaaaauccgugaacc   | 0 | 124 | 83  | 5  | 6 | 4 | 8  | 32 | 21 | 30 |
| scaffold81177_590182   | 22 | caugaucaaacucuuugacc      | 0 | 124 | 114 | 7  | 7 | 2 | 6  | 53 | 46 | 15 |
| C12664097_3604879      | 24 | aaacaaguaacucuagugugagcu  | 0 | 124 | 123 | 6  | 4 | 5 | 9  | 54 | 33 | 36 |
| scaffold44051_325723   | 21 | caugauauacauuguugccc      | 0 | 124 | 123 | 7  | 5 | 4 | 5  | 51 | 45 | 27 |
| scaffold78385_570124   | 24 | aagcuuaacucgguuccuuaggac  | 0 | 124 | 124 | 7  | 6 | 5 | 6  | 37 | 38 | 49 |
| C17278875_5238877      | 24 | uaagagacuacaagccuuguc     | 0 | 124 | 124 | 6  | 5 | 4 | 9  | 75 | 40 | 9  |
| scaffold422363_3086276 | 23 | cugcgugaaaccuuuugggcc     | 0 | 123 | 72  | 7  | 7 | 6 | 3  | 25 | 38 | 9  |
| scaffold282561_2020160 | 21 | aacugcugacucguugauucg     | 0 | 123 | 117 | 7  | 5 | 5 | 4  | 22 | 27 | 68 |
| scaffold289347_2068678 | 22 | uaagacuugaugagcuggcuu     | 0 | 123 | 123 | 8  | 3 | 6 | 5  | 71 | 33 | 19 |
| scaffold141342_1016303 | 21 | ggaagaaggcaaagaaccugc     | 0 | 121 | 118 | 1  | 4 | 7 | 9  | 62 | 56 | 0  |
| C13415502_3789695      | 21 | cagagaauccucugaucgauc     | 0 | 121 | 120 | 5  | 6 | 4 | 6  | 45 | 21 | 54 |
| scaffold319958_2286435 | 24 | cguguucgaguuaauuaaaugac   | 0 | 120 | 53  | 8  | 3 | 5 | 8  | 27 | 11 | 15 |
| scaffold368706_2644909 | 24 | ugugacaucagugcauugguuagu  | 0 | 120 | 120 | 9  | 3 | 7 | 5  | 57 | 32 | 31 |
| scaffold290251_2074722 | 24 | ucagucgacugaguggccaucagu  | 0 | 120 | 120 | 6  | 6 | 7 | 5  | 31 | 39 | 50 |
| scaffold201456_1440884 | 23 | aaauauggauugcaauugaacu    | 0 | 119 | 99  | 7  | 2 | 4 | 10 | 53 | 12 | 34 |
| scaffold143212_1029082 | 24 | ucagucgacugaguggccaucagu  | 0 | 119 | 119 | 6  | 6 | 7 | 5  | 31 | 38 | 50 |
| scaffold4305_32650     | 20 | uuuagcaccuccugacagc       | 0 | 118 | 83  | 4  | 8 | 4 | 4  | 18 | 37 | 28 |
| C13560391_3827149      | 24 | aggauauuacucauaaaaugagu   | 0 | 117 | 116 | 7  | 2 | 4 | 11 | 55 | 16 | 45 |
| scaffold207399_1484946 | 24 | gcaaaaucguuuugcacuuggac   | 0 | 117 | 117 | 7  | 6 | 5 | 6  | 66 | 18 | 33 |
| scaffold187664_1340637 | 24 | gcaaaaucguuuugcacuuggac   | 0 | 117 | 117 | 7  | 6 | 5 | 6  | 66 | 18 | 33 |
| C14191781_3983904      | 24 | gcaaaaucguuuugcacuuggac   | 0 | 117 | 117 | 7  | 6 | 5 | 6  | 66 | 18 | 33 |
| scaffold54424_401517   | 22 | gaccaggaccacuaucacgug     | 0 | 117 | 117 | 3  | 8 | 5 | 6  | 18 | 25 | 74 |
| scaffold193914_1385846 | 24 | gagaguaaauggaauuuuucggc   | 0 | 116 | 61  | 5  | 2 | 7 | 10 | 37 | 9  | 15 |
| scaffold202056_1444817 | 24 | gugaucacucuggccuaaaugagc  | 0 | 116 | 81  | 6  | 6 | 6 | 6  | 39 | 21 | 21 |
| scaffold180313_1290857 | 24 | uugcuguugguguuuaaauagagac | 0 | 116 | 105 | 10 | 2 | 7 | 5  | 53 | 35 | 17 |

|                        |    |                           |   |     |     |    |   |   |   |    |    |     |
|------------------------|----|---------------------------|---|-----|-----|----|---|---|---|----|----|-----|
| scaffold203802_1457778 | 21 | uugaugaaguauaccugaga      | 0 | 116 | 115 | 6  | 3 | 5 | 7 | 0  | 0  | 115 |
| C16322001_4658799      | 21 | ugugcaucuuugccaucccu      | 0 | 116 | 115 | 8  | 7 | 3 | 3 | 45 | 45 | 25  |
| C13277793_3755174      | 22 | cagauucagcauuuucugguc     | 0 | 116 | 115 | 8  | 5 | 4 | 5 | 59 | 56 | 0   |
| scaffold59887_443607   | 22 | cgaauuugaauugccuugagcc    | 0 | 115 | 114 | 7  | 5 | 5 | 5 | 0  | 0  | 114 |
| C17404436_5350536      | 24 | aguaaaugaucauauacucggccc  | 0 | 115 | 115 | 6  | 6 | 4 | 8 | 44 | 42 | 29  |
| scaffold163371_1171269 | 24 | acagcuuacucgguccuuaggaac  | 0 | 114 | 94  | 6  | 7 | 5 | 6 | 42 | 27 | 25  |
| scaffold396068_2856191 | 24 | aagguuuacucgguccuaggaac   | 0 | 114 | 98  | 7  | 5 | 6 | 6 | 51 | 15 | 32  |
| C16349949_4672704      | 24 | caaccagaaggugcuaaaugcauu  | 0 | 114 | 104 | 5  | 5 | 5 | 9 | 35 | 26 | 43  |
| scaffold392850_2830067 | 24 | cuaaaagucucaaucuguaccgau  | 0 | 114 | 112 | 7  | 6 | 3 | 8 | 28 | 17 | 67  |
| C16068943_4553996      | 22 | gaagguccucaaucggcgguc     | 0 | 114 | 112 | 4  | 6 | 7 | 5 | 48 | 40 | 24  |
| C15575919_4375589      | 24 | caaaucgguccgagauuugcacc   | 0 | 113 | 99  | 6  | 7 | 5 | 6 | 21 | 23 | 55  |
| C13248485_3747871      | 21 | ugacuggaugccacguggcgc     | 0 | 113 | 113 | 4  | 6 | 8 | 3 | 34 | 53 | 26  |
| C15329727_4296294      | 24 | ugaguauaugaaucacucacc     | 0 | 112 | 107 | 8  | 5 | 4 | 7 | 50 | 32 | 25  |
| C13408512_3787967      | 24 | aggcucagucgacugaggcuugcu  | 0 | 112 | 111 | 6  | 6 | 8 | 4 | 44 | 33 | 34  |
| C15388859_4316305      | 24 | caaccagaaggugcuaaaugcauu  | 0 | 111 | 98  | 5  | 5 | 5 | 9 | 34 | 24 | 40  |
| scaffold413886_3007993 | 24 | auuuuauagaucucgaugaguagg  | 0 | 111 | 107 | 9  | 2 | 6 | 7 | 38 | 15 | 54  |
| scaffold195017_1393592 | 24 | ucagucgacugaugccuugcuc    | 0 | 111 | 111 | 7  | 7 | 6 | 4 | 45 | 24 | 42  |
| scaffold51834_382071   | 24 | uuagaggcaccuuggcugaagcc   | 0 | 111 | 111 | 5  | 6 | 8 | 5 | 38 | 34 | 39  |
| C13639819_3848072      | 23 | uaaaugcauuuagcaccaccugg   | 0 | 111 | 111 | 6  | 6 | 4 | 7 | 23 | 41 | 47  |
| scaffold246392_1762192 | 21 | cauggguggacuuggcaagac     | 0 | 111 | 111 | 4  | 4 | 8 | 5 | 48 | 45 | 18  |
| scaffold169410_1212616 | 24 | uugcaggcuuguacacucggguugc | 0 | 110 | 79  | 8  | 6 | 7 | 3 | 21 | 21 | 37  |
| scaffold430132_3162824 | 24 | uuuuuuuucuuugacuuugcacc   | 0 | 110 | 107 | 13 | 6 | 2 | 3 | 18 | 39 | 50  |
| scaffold118875_859211  | 24 | aguaaaugaucauauacucggccc  | 0 | 110 | 107 | 6  | 6 | 4 | 8 | 40 | 41 | 26  |
| scaffold104251_754644  | 24 | cgggaccuucuuugguugagagc   | 0 | 109 | 54  | 6  | 6 | 8 | 4 | 18 | 25 | 11  |
| C13575081_3831191      | 21 | ucacugcaauaugacuugc       | 0 | 109 | 94  | 7  | 5 | 3 | 6 | 43 | 24 | 27  |
| scaffold179170_1280337 | 24 | ccagagugaucacuagggccuggc  | 0 | 109 | 103 | 4  | 7 | 8 | 5 | 42 | 38 | 23  |

|                        |    |                          |   |     |     |    |   |   |    |    |    |    |
|------------------------|----|--------------------------|---|-----|-----|----|---|---|----|----|----|----|
| scaffold325781_2327924 | 24 | caaccagaaggugcuaaaugcauu | 0 | 109 | 104 | 5  | 5 | 5 | 9  | 35 | 26 | 43 |
| scaffold345620_2470878 | 24 | aaacgagaaguggguuaacuaaac | 0 | 109 | 108 | 4  | 3 | 6 | 11 | 50 | 32 | 26 |
| scaffold347440_2484301 | 24 | agcugauucguaucguugaacc   | 0 | 109 | 108 | 7  | 7 | 5 | 5  | 50 | 58 | 0  |
| scaffold273589_1957181 | 24 | auuuucaaugugacauggcacauc | 0 | 108 | 96  | 8  | 5 | 4 | 7  | 39 | 28 | 29 |
| scaffold284478_2034286 | 24 | caaccagaaggugcuaaaugcauu | 0 | 108 | 102 | 5  | 5 | 5 | 9  | 35 | 24 | 43 |
| scaffold49136_362751   | 24 | uucugggccaucagucgacugagc | 0 | 108 | 106 | 6  | 7 | 7 | 4  | 36 | 31 | 39 |
| C16718350_4851560      | 24 | uuuccaucgcucgacugugggcgu | 0 | 108 | 108 | 8  | 7 | 7 | 2  | 30 | 35 | 43 |
| scaffold223093_1595345 | 20 | uuguaagaaccaugaauuu      | 0 | 108 | 108 | 7  | 3 | 3 | 7  | 69 | 39 | 0  |
| scaffold25852_193745   | 24 | ugauuuuuuaccaacuuggcagc  | 0 | 107 | 105 | 10 | 5 | 4 | 5  | 39 | 46 | 20 |
| scaffold288867_2065420 | 24 | accgaggccuuuugaguuaaaac  | 0 | 107 | 107 | 6  | 5 | 5 | 8  | 23 | 32 | 52 |
| scaffold85578_622775   | 24 | agagugaucuaagccuggcuc    | 0 | 106 | 85  | 5  | 6 | 7 | 6  | 38 | 15 | 32 |
| C14097917_3960927      | 24 | uuucauuuaguaguuaaccacu   | 0 | 106 | 93  | 10 | 5 | 2 | 7  | 44 | 21 | 28 |
| scaffold123836_892809  | 23 | uaaaugcauuagcaccaccugg   | 0 | 106 | 103 | 6  | 6 | 4 | 7  | 19 | 38 | 46 |
| scaffold401229_2898028 | 24 | aagguuuacugguuccuaggaac  | 0 | 105 | 100 | 7  | 5 | 6 | 6  | 51 | 17 | 32 |
| scaffold372719_2672553 | 23 | auuaaguaguaccgguauuagu   | 0 | 105 | 102 | 9  | 2 | 5 | 7  | 38 | 34 | 30 |
| scaffold53112_391988   | 22 | ugggguaguggaaauuugucac   | 0 | 105 | 104 | 7  | 2 | 8 | 5  | 44 | 33 | 27 |
| scaffold355057_2541097 | 24 | acauguaaaaacgccacuggcacu | 0 | 105 | 105 | 4  | 7 | 4 | 9  | 30 | 22 | 53 |
| C14059109_3951727      | 24 | cgugcgaacuggccuuuuggcac  | 0 | 105 | 105 | 6  | 8 | 7 | 3  | 13 | 48 | 44 |
| scaffold217640_1555987 | 24 | uauuggguuagugacacuuuggcc | 0 | 104 | 100 | 10 | 4 | 7 | 3  | 21 | 48 | 31 |
| scaffold34185_254931   | 24 | caaccagaaggugcuaaaugcauu | 0 | 104 | 102 | 5  | 5 | 5 | 9  | 35 | 24 | 43 |
| C16113889_4571903      | 24 | uuuaaugcauccgguagaauagg  | 0 | 104 | 103 | 7  | 3 | 6 | 8  | 28 | 30 | 45 |
| scaffold16240_122339   | 24 | acuagaaauuguccugaagcacc  | 0 | 104 | 103 | 5  | 7 | 4 | 8  | 56 | 37 | 10 |
| scaffold302388_2160438 | 24 | aaugugcugccuaaagucacc    | 0 | 103 | 99  | 5  | 8 | 5 | 6  | 29 | 32 | 38 |
| scaffold258251_1846379 | 22 | acuacaauaugaacuuugcacu   | 0 | 103 | 101 | 7  | 5 | 2 | 8  | 35 | 30 | 36 |
| C13999025_3937389      | 24 | uuuacacuaggguuacuugaacc  | 0 | 103 | 103 | 8  | 5 | 4 | 7  | 53 | 29 | 21 |
| scaffold125115_901142  | 23 | uaaaugcauuagcaccaccugg   | 0 | 103 | 103 | 6  | 6 | 4 | 7  | 19 | 38 | 46 |

|                        |    |                          |   |     |     |   |    |   |   |    |    |    |
|------------------------|----|--------------------------|---|-----|-----|---|----|---|---|----|----|----|
| C16259755_4634354      | 24 | cagaaggugcuaaaugcauuuagc | 0 | 102 | 67  | 6 | 4  | 6 | 8 | 20 | 26 | 21 |
| scaffold69617_509043   | 24 | augccacgucagauuuuuugucc  | 0 | 102 | 100 | 9 | 6  | 5 | 4 | 35 | 34 | 31 |
| C15258555_4274216      | 23 | acucagucgacugauggccccaga | 0 | 102 | 101 | 4 | 7  | 6 | 6 | 44 | 20 | 37 |
| C16709948_4847014      | 24 | uuuaaugcauccgguaagaauagg | 0 | 102 | 102 | 7 | 3  | 6 | 8 | 27 | 30 | 45 |
| C14262675_4001628      | 24 | ucagucgacugauggccacucagu | 0 | 101 | 67  | 6 | 7  | 6 | 5 | 31 | 13 | 23 |
| C16830203_4915355      | 24 | agugcacuuacauaaacucggcuc | 0 | 101 | 96  | 6 | 7  | 4 | 7 | 42 | 23 | 31 |
| C13183277_3731562      | 22 | ucccacuuggagacaauugcaac  | 0 | 101 | 96  | 4 | 7  | 4 | 7 | 41 | 34 | 21 |
| scaffold69127_505779   | 23 | cauuggcucggccuuuaggacc   | 0 | 101 | 100 | 5 | 8  | 6 | 4 | 42 | 29 | 29 |
| C17137702_5122161      | 23 | aauguagaacucauuuauagcacc | 0 | 101 | 101 | 6 | 5  | 3 | 9 | 39 | 37 | 25 |
| scaffold283088_2024084 | 24 | uugaggaccaauuagcaugcuguu | 0 | 100 | 92  | 7 | 4  | 6 | 7 | 1  | 2  | 89 |
| scaffold9900_73656     | 24 | ucacucguaugaaccuuuauggcu | 0 | 100 | 99  | 8 | 6  | 4 | 6 | 24 | 36 | 39 |
| scaffold41863_312189   | 21 | uauuucacugcauuuauugaacu  | 0 | 99  | 97  | 8 | 4  | 2 | 7 | 34 | 21 | 42 |
| scaffold370920_2660358 | 24 | agcuuaacucaguuccuuaggacc | 0 | 99  | 99  | 7 | 7  | 4 | 6 | 15 | 29 | 55 |
| C16781419_4886519      | 24 | ccgguaaacuggaccgugcacacc | 0 | 99  | 99  | 4 | 9  | 6 | 5 | 21 | 45 | 33 |
| C14713428_4118716      | 23 | gaggacuuggaugaauugguuc   | 0 | 98  | 72  | 7 | 2  | 9 | 5 | 36 | 13 | 23 |
| scaffold157153_1128101 | 24 | auccacauaugguuggaaagcucu | 0 | 98  | 96  | 7 | 5  | 5 | 7 | 42 | 24 | 30 |
| scaffold99044_718236   | 24 | auuuucaaugugacauggcacauc | 0 | 98  | 96  | 8 | 5  | 4 | 7 | 39 | 28 | 29 |
| scaffold29587_221817   | 24 | ucagucgacugaugagccuugcuc | 0 | 98  | 98  | 7 | 7  | 6 | 4 | 39 | 21 | 38 |
| scaffold434843_3211933 | 24 | cgguaaacggaccgugcacacc   | 0 | 98  | 98  | 3 | 10 | 6 | 5 | 25 | 26 | 47 |
| scaffold426864_3128650 | 24 | auagaaauuaccagugacucac   | 0 | 97  | 87  | 6 | 5  | 4 | 9 | 59 | 23 | 5  |
| scaffold374808_2688316 | 24 | acaagucacucaguccuaaggaac | 0 | 97  | 89  | 4 | 7  | 4 | 9 | 26 | 35 | 28 |
| C16675540_4828598      | 24 | aucuuaggcuaguaacaugcacc  | 0 | 97  | 95  | 6 | 6  | 4 | 8 | 42 | 23 | 30 |
| scaffold158849_1139340 | 24 | aauuuugggcugggcugggagccc | 0 | 97  | 97  | 6 | 6  | 9 | 3 | 32 | 29 | 36 |
| scaffold26392_198099   | 23 | uaaacccguacauuuuugaaauga | 0 | 96  | 91  | 7 | 4  | 3 | 9 | 17 | 22 | 52 |
| C12700033_3613519      | 22 | uaaaugcauuuagcaccuucug   | 0 | 96  | 91  | 8 | 5  | 3 | 6 | 39 | 23 | 29 |
| C15489585_4347165      | 24 | uccaacggcuauuuucugggccau | 0 | 96  | 96  | 7 | 7  | 5 | 5 | 39 | 19 | 38 |

|                        |    |                           |   |    |    |    |   |   |    |    |    |    |
|------------------------|----|---------------------------|---|----|----|----|---|---|----|----|----|----|
| scaffold136162_980531  | 24 | aaugcacugaugccacaucauuug  | 0 | 95 | 84 | 7  | 6 | 4 | 7  | 28 | 21 | 35 |
| scaffold136163_980551  | 24 | aaugcacugaugccacaucauuug  | 0 | 95 | 84 | 7  | 6 | 4 | 7  | 28 | 21 | 35 |
| C13091962_3709253      | 24 | aaugcacugaugccacaucauuug  | 0 | 95 | 84 | 7  | 6 | 4 | 7  | 28 | 21 | 35 |
| C16213093_4612511      | 21 | uaugucgcgcgacacuugccc     | 0 | 95 | 93 | 5  | 8 | 5 | 3  | 41 | 25 | 27 |
| C13503748_3812364      | 21 | uaugucgcgcgacacuugccc     | 0 | 95 | 93 | 5  | 8 | 5 | 3  | 41 | 25 | 27 |
| scaffold218294_1560527 | 24 | cuccuauuuuguagccaagacacc  | 0 | 95 | 94 | 7  | 8 | 3 | 6  | 38 | 35 | 21 |
| scaffold381157_2737008 | 24 | acuuccaguaugcuguagaggcgc  | 0 | 95 | 95 | 6  | 6 | 7 | 5  | 41 | 15 | 39 |
| scaffold138556_997187  | 24 | acuuccaguaugcuguagaggcgc  | 0 | 95 | 95 | 6  | 6 | 7 | 5  | 41 | 15 | 39 |
| scaffold206333_1476679 | 24 | acuuccaguaugcuguagaggcgc  | 0 | 95 | 95 | 6  | 6 | 7 | 5  | 41 | 15 | 39 |
| scaffold350496_2507129 | 24 | ggacaguaucguuacuaugucgc   | 0 | 95 | 95 | 7  | 5 | 7 | 5  | 36 | 31 | 28 |
| scaffold177267_1266970 | 24 | gccgugaaacgucuuaaagagagc  | 0 | 94 | 54 | 4  | 5 | 7 | 8  | 21 | 14 | 19 |
| scaffold276950_1981121 | 22 | uguucacucucuucugucagu     | 0 | 94 | 73 | 11 | 6 | 3 | 2  | 28 | 30 | 15 |
| C16671708_4826628      | 24 | aaguuuguugauaggaacucgccu  | 0 | 94 | 82 | 8  | 4 | 6 | 6  | 20 | 14 | 48 |
| scaffold433139_3193962 | 23 | auaaccauggguauccggggcccc  | 0 | 94 | 82 | 4  | 7 | 7 | 5  | 22 | 30 | 30 |
| C15232483_4266239      | 24 | ucagucgacugauggccacucagu  | 0 | 94 | 83 | 6  | 7 | 6 | 5  | 32 | 21 | 30 |
| C15446737_4333333      | 24 | cucugagcgcugcugauaacguguu | 0 | 94 | 94 | 8  | 5 | 7 | 4  | 31 | 23 | 40 |
| scaffold305726_2183204 | 24 | aaugucgcgucgccuaaagucaccc | 0 | 93 | 84 | 5  | 8 | 5 | 6  | 18 | 28 | 38 |
| scaffold202675_1449393 | 23 | aaaauaggauugcauaugaacu    | 0 | 93 | 91 | 7  | 2 | 4 | 10 | 47 | 12 | 32 |
| scaffold307588_2196817 | 22 | uaaaugcauuuagcaccuucug    | 0 | 93 | 92 | 8  | 5 | 3 | 6  | 40 | 23 | 29 |
| scaffold125925_907092  | 22 | auagcauugauuuuggaaccc     | 0 | 93 | 92 | 7  | 4 | 5 | 6  | 52 | 40 | 0  |
| scaffold387183_2784002 | 21 | uaugucgcgcgacacuugccc     | 0 | 93 | 93 | 5  | 8 | 5 | 3  | 41 | 25 | 27 |
| C15047276_4212137      | 24 | auuuuacaacugauaugacacc    | 0 | 92 | 53 | 7  | 5 | 3 | 9  | 31 | 15 | 7  |
| scaffold210212_1507372 | 24 | ugaucacgccuuggccuaaggacc  | 0 | 92 | 87 | 5  | 8 | 6 | 5  | 24 | 37 | 26 |
| scaffold204845_1465371 | 24 | caaccaugacuagucaacauugac  | 0 | 92 | 89 | 5  | 7 | 3 | 9  | 45 | 37 | 7  |
| C13374860_3779360      | 24 | aagaauuggaacuaaguuggccu   | 0 | 92 | 90 | 5  | 3 | 7 | 9  | 59 | 29 | 2  |
| scaffold420041_3064722 | 24 | aauuuuugagaguuuugaaacacc  | 0 | 92 | 91 | 9  | 3 | 4 | 8  | 36 | 22 | 33 |

|                        |    |                           |   |    |    |    |   |   |    |    |    |    |
|------------------------|----|---------------------------|---|----|----|----|---|---|----|----|----|----|
| scaffold38400_290921   | 22 | uaaaugcauuuagcaccuucug    | 0 | 92 | 91 | 8  | 5 | 3 | 6  | 39 | 23 | 29 |
| scaffold152254_1093440 | 22 | uaaaugcauuuagcaccuucug    | 0 | 92 | 92 | 8  | 5 | 3 | 6  | 40 | 23 | 29 |
| C13370502_3778553      | 22 | uaaaugcauuuagcaccuucug    | 0 | 92 | 92 | 8  | 5 | 3 | 6  | 40 | 23 | 29 |
| scaffold132303_953242  | 23 | uaaaugcauuuagcaccaccuga   | 0 | 91 | 90 | 6  | 6 | 3 | 8  | 41 | 18 | 31 |
| scaffold69670_509522   | 20 | aggaugggugacccccuggg      | 0 | 91 | 90 | 3  | 5 | 9 | 3  | 40 | 37 | 13 |
| scaffold402233_2906474 | 24 | gcaaaagcacuuuugcaccugagc  | 0 | 90 | 89 | 5  | 7 | 5 | 7  | 38 | 34 | 17 |
| scaffold100479_728597  | 22 | uaaaugcauuuagcaccuucug    | 0 | 90 | 90 | 8  | 5 | 3 | 6  | 41 | 22 | 27 |
| scaffold295109_2108309 | 20 | uccaaagaaccggauaacac      | 0 | 90 | 90 | 2  | 6 | 3 | 9  | 50 | 26 | 14 |
| scaffold178125_1273627 | 24 | guauaauggcuguguauuuugcac  | 0 | 89 | 73 | 10 | 3 | 6 | 5  | 29 | 28 | 16 |
| scaffold253650_1813546 | 24 | accuucaucgguugagagcaacc   | 0 | 89 | 83 | 6  | 7 | 5 | 6  | 37 | 24 | 22 |
| scaffold453070_3452935 | 24 | caccgagaaaaugauuaaugaauac | 0 | 89 | 88 | 5  | 4 | 4 | 11 | 49 | 15 | 24 |
| C16642252_4811365      | 24 | aaaguuggcccaaacaccucuggg  | 0 | 89 | 89 | 4  | 7 | 6 | 7  | 15 | 17 | 57 |
| scaffold452476_3442638 | 24 | uugguacugaucgaagcauggcc   | 0 | 89 | 89 | 6  | 6 | 7 | 5  | 52 | 23 | 14 |
| scaffold274003_1959851 | 22 | cauuuagcaccaccuggacagc    | 0 | 88 | 88 | 4  | 8 | 4 | 6  | 27 | 30 | 31 |
| scaffold59454_437989   | 24 | caucagucgacuaagcagagaggc  | 0 | 87 | 34 | 3  | 6 | 7 | 8  | 11 | 10 | 13 |
| scaffold44649_330411   | 24 | agugaaauaggacugcaaaguuc   | 0 | 87 | 78 | 6  | 3 | 6 | 9  | 42 | 14 | 22 |
| scaffold340150_2430386 | 24 | aaugcaccgguaagaauaggugg   | 0 | 87 | 82 | 4  | 4 | 8 | 8  | 28 | 14 | 40 |
| C16623458_4802803      | 24 | acaugcauuuagcaccacuuggac  | 0 | 87 | 82 | 6  | 7 | 4 | 7  | 30 | 28 | 24 |
| scaffold340538_2434894 | 24 | auguguaugauacaucugaugccc  | 0 | 87 | 83 | 8  | 5 | 5 | 6  | 38 | 35 | 10 |
| scaffold454926_3487696 | 21 | accugugaccucuuuaauaca     | 0 | 87 | 85 | 7  | 6 | 2 | 6  | 36 | 14 | 35 |
| scaffold249041_1781810 | 22 | uuuaggacauaacauucaguac    | 0 | 87 | 86 | 7  | 4 | 3 | 8  | 71 | 8  | 7  |
| C13510758_3814335      | 24 | aaaugcauuuagcaccuucugauu  | 0 | 87 | 86 | 9  | 5 | 3 | 7  | 20 | 24 | 42 |
| C13020022_3691609      | 21 | uaaaugcauuuagcaccucucu    | 0 | 86 | 79 | 7  | 6 | 2 | 6  | 28 | 22 | 29 |
| scaffold453639_3463640 | 24 | aauguacaacucacuaaaugcgcc  | 0 | 86 | 85 | 5  | 8 | 3 | 8  | 14 | 11 | 60 |
| C14468244_4053749      | 21 | ggacugcaauaugaacuuugc     | 0 | 86 | 86 | 6  | 4 | 5 | 6  | 29 | 33 | 24 |
| scaffold278508_1991664 | 24 | caaugcacuuucugacacaucauu  | 0 | 86 | 86 | 8  | 7 | 2 | 7  | 44 | 42 | 0  |



|                        |    |                          |   |    |    |    |    |   |   |    |    |    |
|------------------------|----|--------------------------|---|----|----|----|----|---|---|----|----|----|
| scaffold107459_777485  | 20 | aagggaugguuacaagcac      | 0 | 85 | 41 | 3  | 3  | 6 | 8 | 22 | 11 | 8  |
| C15601029_4383943      | 24 | ggacaguaucguuacuaugugcgc | 0 | 85 | 81 | 7  | 5  | 7 | 5 | 28 | 28 | 25 |
| scaffold438323_3249585 | 24 | cgggaccuucuuucguugagagc  | 0 | 84 | 32 | 6  | 6  | 8 | 4 | 12 | 14 | 6  |
| scaffold120396_869626  | 24 | auuuagcaccaauucugaugagac | 0 | 84 | 83 | 7  | 5  | 4 | 8 | 28 | 33 | 22 |
| scaffold6600_49611     | 24 | augcauuuagcaccuucugguugc | 0 | 84 | 84 | 9  | 6  | 5 | 4 | 29 | 27 | 28 |
| C15920013_4496477      | 24 | ugaucacgccuuggccuaaggacc | 0 | 84 | 84 | 5  | 8  | 6 | 5 | 22 | 33 | 29 |
| scaffold408232_2958697 | 23 | aguaaauguauuuacucacucg   | 0 | 83 | 19 | 8  | 4  | 4 | 7 | 5  | 2  | 12 |
| scaffold408700_2962557 | 24 | auggacagagcccaucagucgacu | 0 | 83 | 63 | 4  | 7  | 6 | 7 | 18 | 15 | 30 |
| scaffold145021_1044169 | 24 | auaaauaucguacugagguggacc | 0 | 83 | 66 | 6  | 4  | 7 | 7 | 19 | 17 | 30 |
| C15455759_4336311      | 24 | agguccuuauugggaaaugcuaaa | 0 | 82 | 55 | 7  | 4  | 6 | 7 | 11 | 16 | 28 |
| C13676505_3857622      | 24 | acggaaaaccgucgcuaaaggucc | 0 | 82 | 69 | 3  | 7  | 6 | 8 | 28 | 22 | 19 |
| scaffold89169_648220   | 24 | aucuaauggucuaaaaaguuuac  | 0 | 82 | 79 | 8  | 3  | 4 | 9 | 33 | 27 | 19 |
| scaffold453286_3457324 | 24 | aaccugcuaacucgaaaugacc   | 0 | 82 | 80 | 5  | 8  | 3 | 8 | 34 | 31 | 15 |
| scaffold13758_103452   | 23 | uacuuuacucgguuccuuaggac  | 0 | 81 | 44 | 9  | 6  | 4 | 4 | 21 | 9  | 14 |
| C16168647_4593834      | 23 | agaaauguggaaguuggcaacc   | 0 | 81 | 77 | 4  | 3  | 7 | 9 | 25 | 32 | 20 |
| C13026008_3693113      | 24 | acagucagugagaccagcagagc  | 0 | 81 | 80 | 2  | 7  | 7 | 8 | 31 | 20 | 29 |
| scaffold373626_2679514 | 21 | uccaaguaguacaauuugccc    | 0 | 81 | 80 | 6  | 6  | 3 | 6 | 22 | 47 | 11 |
| C17235205_5201451      | 23 | accacuuuuuuuauaguagcuugu | 0 | 81 | 81 | 12 | 4  | 3 | 4 | 9  | 5  | 67 |
| C14154339_3974580      | 24 | agcucugcucagucgacugauggc | 0 | 80 | 56 | 6  | 7  | 7 | 4 | 23 | 18 | 15 |
| scaffold261664_1870641 | 24 | ccggucaaccggaccgucacacc  | 0 | 80 | 77 | 2  | 11 | 6 | 5 | 9  | 34 | 34 |
| C13506508_3813187      | 22 | uuagaauccgagaauuuggugc   | 0 | 80 | 78 | 7  | 3  | 6 | 6 | 36 | 37 | 5  |
| scaffold295340_2109718 | 24 | acacuguacugcgcuaagagccc  | 0 | 80 | 79 | 4  | 9  | 5 | 6 | 34 | 24 | 21 |
| scaffold116177_839909  | 24 | uacggaucaaaacuagcaggcccc | 0 | 80 | 80 | 3  | 8  | 6 | 7 | 6  | 10 | 64 |
| C17155326_5135425      | 24 | uacggaucaaaacuagcaggcccc | 0 | 80 | 80 | 3  | 8  | 6 | 7 | 6  | 10 | 64 |
| scaffold360146_2578087 | 21 | cauggguggacuuggcaagac    | 0 | 80 | 80 | 4  | 4  | 8 | 5 | 36 | 32 | 12 |
| scaffold458357_3564696 | 23 | uuguggguggcaccagucgac    | 0 | 80 | 80 | 6  | 5  | 9 | 3 | 31 | 48 | 1  |

|                        |    |                          |   |    |    |    |    |    |    |    |    |    |
|------------------------|----|--------------------------|---|----|----|----|----|----|----|----|----|----|
| scaffold290956_2079615 | 22 | uuuauacagucaaauguugggcc  | 0 | 79 | 76 | 7  | 4  | 5  | 6  | 0  | 0  | 76 |
| scaffold300708_2148685 | 24 | ucugugagaaaauccuaugguac  | 0 | 79 | 77 | 8  | 4  | 5  | 7  | 28 | 49 | 0  |
| scaffold184416_1317522 | 21 | ccgaggcucagaaauugaucc    | 0 | 79 | 78 | 5  | 6  | 5  | 5  | 2  | 0  | 76 |
| scaffold25404_190353   | 23 | uaaaugcauuuagcaccaccuga  | 0 | 79 | 79 | 6  | 6  | 3  | 8  | 35 | 14 | 30 |
| C15301315_4287362      | 24 | auuuagcaccaauucugaugagac | 0 | 78 | 77 | 7  | 5  | 4  | 8  | 27 | 32 | 18 |
| scaffold72276_527384   | 24 | uacggaucaaacuagcgaggcccc | 0 | 78 | 78 | 3  | 8  | 6  | 7  | 5  | 10 | 63 |
| scaffold17408_131251   | 24 | aaauuuggggccugaggcaagagc | 0 | 78 | 78 | 4  | 4  | 9  | 7  | 39 | 17 | 22 |
| scaffold120960_873018  | 24 | guacuguucacagucacuguuac  | 0 | 77 | 62 | 8  | 7  | 4  | 5  | 23 | 19 | 20 |
| scaffold436474_3229184 | 20 | gcggaccaguccguacggac     | 0 | 77 | 72 | 2  | 7  | 7  | 4  | 20 | 16 | 36 |
| C16193297_4604098      | 24 | aaaauaggacuguaauaugaacu  | 0 | 77 | 75 | 7  | 2  | 4  | 11 | 35 | 9  | 31 |
| C13588471_3834823      | 24 | uguaccucgagaugucgauugacc | 0 | 77 | 75 | 7  | 6  | 6  | 5  | 27 | 29 | 19 |
| scaffold352904_2526135 | 22 | ccccgaagaaccgguagaaccg   | 0 | 77 | 77 | 1  | 8  | 6  | 7  | 22 | 19 | 36 |
| C16799949_4897310      | 24 | ccggucaaccggaccgugcacacc | 0 | 77 | 77 | 2  | 11 | 6  | 5  | 9  | 34 | 34 |
| scaffold112313_814085  | 24 | cagaaggugcuaaaugcauuuagc | 0 | 76 | 40 | 6  | 4  | 6  | 8  | 12 | 16 | 12 |
| scaffold367523_2634817 | 21 | uugauucaaguuuuuagacu     | 0 | 76 | 44 | 10 | 2  | 3  | 6  | 11 | 10 | 23 |
| scaffold367523_2634810 | 21 | uugauucaaguuuuuagacu     | 0 | 76 | 44 | 10 | 2  | 3  | 6  | 11 | 10 | 23 |
| C15960915_4511926      | 24 | ggggauuagucggaccgaaggugc | 0 | 76 | 69 | 4  | 4  | 11 | 5  | 29 | 15 | 25 |
| scaffold9636_71966     | 21 | auauacggugguacuguuac     | 0 | 76 | 70 | 7  | 4  | 5  | 5  | 37 | 11 | 22 |
| scaffold60191_442782   | 24 | ggaagaccacguaccgcucgauc  | 0 | 76 | 74 | 3  | 9  | 6  | 6  | 11 | 38 | 25 |
| C16837191_4919797      | 20 | agucgacugauggcccagaa     | 0 | 76 | 75 | 3  | 5  | 6  | 6  | 29 | 16 | 30 |
| scaffold218286_1560449 | 21 | aaggguggugauguuggcacc    | 0 | 76 | 75 | 5  | 3  | 9  | 4  | 17 | 33 | 25 |
| scaffold386542_2778716 | 24 | uuagaacugaguaacagacaccu  | 0 | 76 | 76 | 5  | 5  | 4  | 10 | 29 | 13 | 34 |
| C17037047_5047613      | 24 | aagguacaacucauuuaugcacc  | 0 | 76 | 76 | 6  | 6  | 3  | 9  | 22 | 18 | 36 |
| scaffold109360_791950  | 24 | aaaugcauuuagcaccucauggac | 0 | 75 | 39 | 6  | 6  | 4  | 8  | 23 | 10 | 6  |
| scaffold258070_1844887 | 23 | uuucauccuggggacggcguggc  | 0 | 75 | 53 | 6  | 6  | 9  | 2  | 17 | 12 | 24 |
| scaffold207113_1482462 | 24 | gguccagugguagacaacuuucac | 0 | 75 | 65 | 6  | 6  | 6  | 6  | 19 | 37 | 9  |

|                        |    |                           |   |    |    |    |   |    |    |    |    |    |
|------------------------|----|---------------------------|---|----|----|----|---|----|----|----|----|----|
| scaffold299540_2141276 | 24 | gaguuuuuuuuaaauaacucgccu  | 0 | 75 | 73 | 10 | 4 | 5  | 5  | 17 | 18 | 38 |
| scaffold253242_1811265 | 23 | gaaccguuagaaccguuaaaacc   | 0 | 75 | 75 | 4  | 6 | 4  | 9  | 29 | 15 | 31 |
| C16987591_5013071      | 24 | caaugcacuuucugacacaucauu  | 0 | 75 | 75 | 8  | 7 | 2  | 7  | 39 | 36 | 0  |
| C16861741_4934016      | 24 | aaacgugucugacucgaaaugac   | 0 | 74 | 59 | 6  | 5 | 5  | 8  | 34 | 12 | 13 |
| scaffold90882_660568   | 24 | egguuuggcaccccuauucuaac   | 0 | 74 | 63 | 7  | 9 | 4  | 4  | 13 | 12 | 38 |
| scaffold217546_1555559 | 24 | ugauggaccuuagucgacugagc   | 0 | 74 | 66 | 6  | 6 | 7  | 5  | 14 | 13 | 39 |
| scaffold263469_1884264 | 24 | auagaucuaggagcucaggcugcc  | 0 | 74 | 72 | 5  | 6 | 7  | 6  | 40 | 32 | 0  |
| scaffold83082_604047   | 24 | aagguacaacucauuuaugcacc   | 0 | 74 | 73 | 6  | 6 | 3  | 9  | 24 | 19 | 30 |
| scaffold436592_3230473 | 23 | auuuuagcaccacaugugaacac   | 0 | 74 | 74 | 6  | 6 | 3  | 8  | 25 | 16 | 33 |
| scaffold197926_1414533 | 24 | uggacacugauggagcugugaggc  | 0 | 74 | 74 | 5  | 4 | 10 | 5  | 34 | 21 | 19 |
| C16669252_4825422      | 24 | acccauauaugugcaccuugguac  | 0 | 74 | 74 | 7  | 7 | 4  | 6  | 35 | 21 | 18 |
| C16669252_4825421      | 24 | acccauauaugugcaccuugguac  | 0 | 74 | 74 | 7  | 7 | 4  | 6  | 35 | 21 | 18 |
| C17023137_5037767      | 24 | cggaaugggcuaaaugguacucgc  | 0 | 74 | 74 | 5  | 5 | 8  | 6  | 38 | 24 | 12 |
| scaffold135523_976599  | 20 | ucaucaaaaauuuaaccgg       | 0 | 73 | 40 | 5  | 4 | 2  | 9  | 21 | 19 | 0  |
| C15512817_4354605      | 24 | caucagucgacugagcagggcucc  | 0 | 73 | 57 | 4  | 8 | 7  | 5  | 34 | 12 | 11 |
| scaffold238229_1703522 | 24 | aguuuuauuucgguccuucacaac  | 0 | 73 | 65 | 9  | 6 | 3  | 6  | 23 | 30 | 12 |
| C14244963_3997371      | 24 | aaaugcauuuagcaccuuuggac   | 0 | 73 | 66 | 8  | 5 | 4  | 7  | 23 | 14 | 29 |
| scaffold452111_3436514 | 24 | gaaaguggacucuuaauuugggac  | 0 | 73 | 72 | 7  | 3 | 7  | 7  | 25 | 22 | 25 |
| scaffold16466_124788   | 21 | cagaggauccucugaucgauc     | 0 | 73 | 73 | 5  | 6 | 5  | 5  | 17 | 11 | 45 |
| C14538908_4072359      | 22 | uaaaugcauuuagcaccuucug    | 0 | 73 | 73 | 8  | 5 | 3  | 6  | 30 | 19 | 24 |
| scaffold166033_1189322 | 24 | aaaaguucaugucuaaaaucc     | 0 | 72 | 38 | 8  | 5 | 2  | 9  | 19 | 16 | 3  |
| scaffold403609_2917895 | 24 | uaaaauuuuuuuuguacgucgca   | 0 | 72 | 63 | 12 | 3 | 3  | 6  | 29 | 32 | 2  |
| scaffold321415_2296700 | 24 | accguaaugaauaaucaugcuuaac | 0 | 72 | 64 | 7  | 5 | 3  | 9  | 42 | 11 | 11 |
| scaffold408591_2961603 | 24 | aggaauuuaggauucuuaggaaac  | 0 | 72 | 69 | 7  | 2 | 6  | 9  | 34 | 15 | 20 |
| C13475846_3805278      | 24 | acaaaucaaagcauucgaagacuc  | 0 | 72 | 69 | 4  | 6 | 3  | 11 | 22 | 18 | 29 |
| C16391561_4690367      | 24 | cugguuagacguugaucugaguc   | 0 | 72 | 71 | 8  | 5 | 7  | 4  | 36 | 13 | 22 |

|                        |    |                          |   |    |    |    |   |   |   |    |    |    |
|------------------------|----|--------------------------|---|----|----|----|---|---|---|----|----|----|
| scaffold454679_3483033 | 24 | gcaagauauugucugcuuuggcac | 0 | 72 | 71 | 8  | 5 | 6 | 5 | 17 | 28 | 26 |
| scaffold230565_1650000 | 24 | auuuuucaauccuauaguuaacc  | 0 | 72 | 72 | 10 | 6 | 1 | 7 | 27 | 24 | 21 |
| C15771389_4442020      | 24 | aucagucgacugaugggcuuugcu | 0 | 71 | 51 | 8  | 5 | 7 | 4 | 15 | 15 | 21 |
| C15007934_4200832      | 22 | cagacaaguggauugauuuug    | 0 | 71 | 66 | 7  | 2 | 6 | 7 | 36 | 11 | 19 |
| C13821203_3894914      | 24 | aguaggacggucagaaguuggcac | 0 | 71 | 67 | 4  | 4 | 9 | 7 | 32 | 20 | 15 |
| scaffold139530_1004359 | 24 | aaaugcauuagcaucaccuggac  | 0 | 71 | 70 | 6  | 6 | 4 | 8 | 31 | 12 | 27 |
| scaffold435270_3216388 | 24 | acugcgugaaaccuuucugggcc  | 0 | 71 | 70 | 7  | 7 | 6 | 4 | 19 | 37 | 14 |
| scaffold365599_2620048 | 21 | uuuccgguugaauuuuuugau    | 0 | 70 | 22 | 12 | 2 | 4 | 3 | 6  | 16 | 0  |
| scaffold311814_2226375 | 24 | cagagugaucacuagggccugccu | 0 | 70 | 67 | 5  | 7 | 7 | 5 | 17 | 20 | 30 |
| scaffold161126_1155251 | 22 | caggaaugcaaaaugcuguuuu   | 0 | 70 | 68 | 7  | 3 | 5 | 7 | 36 | 18 | 14 |
| C16753588_4870651      | 23 | ccaaagcuuggaaauuggguacce | 0 | 70 | 70 | 5  | 6 | 6 | 6 | 39 | 27 | 4  |
| scaffold156201_1121844 | 24 | cagaaggugcuaaaugcauuuagc | 0 | 69 | 66 | 6  | 4 | 6 | 8 | 20 | 26 | 20 |
| C16849123_4926617      | 24 | cagagugaucacuagggccugccu | 0 | 69 | 67 | 5  | 7 | 7 | 5 | 17 | 20 | 30 |
| scaffold145852_1047014 | 24 | aauaccgaucgguacuguccauu  | 0 | 69 | 68 | 7  | 6 | 4 | 7 | 28 | 12 | 28 |
| scaffold248544_1778161 | 24 | agaacaucuccaccauuuucauc  | 0 | 69 | 69 | 6  | 8 | 1 | 9 | 37 | 18 | 14 |
| C14880906_4164885      | 24 | augcauuuagcaccuucugguugc | 0 | 69 | 69 | 9  | 6 | 5 | 4 | 25 | 24 | 20 |
| scaffold300279_2145895 | 24 | ccuaaacggaaucaggauccucc  | 0 | 69 | 69 | 6  | 8 | 4 | 6 | 22 | 37 | 10 |
| C15014210_4202615      | 22 | cgguuuuuggcauuaggcauc    | 0 | 68 | 31 | 8  | 4 | 6 | 4 | 2  | 0  | 29 |
| scaffold92551_672756   | 21 | cuaaaugcauuuagcaccccc    | 0 | 68 | 56 | 5  | 8 | 2 | 6 | 24 | 16 | 16 |
| scaffold53916_397667   | 22 | cgcucuuuugaauaccuuuauac  | 0 | 68 | 66 | 9  | 7 | 2 | 4 | 25 | 40 | 1  |
| scaffold7714_57921     | 24 | aaaugcauuuagcaccuucugaau | 0 | 68 | 67 | 8  | 5 | 3 | 8 | 23 | 9  | 35 |
| scaffold92992_676283   | 24 | aaugguaugugucaauaguagccc | 0 | 68 | 68 | 7  | 4 | 6 | 7 | 17 | 29 | 22 |
| scaffold440667_3277082 | 24 | cuggccuuuagggaugaauucuc  | 0 | 67 | 24 | 8  | 6 | 6 | 4 | 17 | 3  | 4  |
| scaffold452961_3450794 | 24 | guugcgagauaccaaguauaaacu | 0 | 67 | 59 | 6  | 4 | 5 | 9 | 14 | 17 | 28 |
| scaffold39939_311940   | 24 | cauuucaacuauuuuugggcgcc  | 0 | 67 | 63 | 9  | 6 | 4 | 5 | 34 | 18 | 11 |
| C14574976_4081691      | 21 | gagagucaucuuguugugag     | 0 | 67 | 65 | 8  | 2 | 7 | 4 | 28 | 16 | 21 |

|                        |    |                          |   |    |    |    |    |   |    |    |    |    |
|------------------------|----|--------------------------|---|----|----|----|----|---|----|----|----|----|
| scaffold279687_1999912 | 24 | uuauuggcaaacccgaacccgcc  | 0 | 67 | 65 | 4  | 9  | 4 | 7  | 16 | 29 | 20 |
| scaffold366558_2627180 | 23 | cugcgugaaacuuuucugggcc   | 0 | 67 | 65 | 7  | 7  | 6 | 3  | 19 | 37 | 9  |
| scaffold2114_16540     | 23 | uggccauugauaguauuuacuca  | 0 | 67 | 66 | 9  | 4  | 4 | 6  | 23 | 15 | 28 |
| scaffold326170_2330445 | 23 | agaguuaccugcugcggggcuau  | 0 | 67 | 67 | 6  | 6  | 7 | 4  | 35 | 12 | 20 |
| scaffold142870_1027021 | 24 | gagugugucuguacaacucgccu  | 0 | 67 | 67 | 7  | 6  | 6 | 5  | 18 | 16 | 33 |
| scaffold388731_2796691 | 22 | cucuccucaaaagucuuccggc   | 0 | 66 | 40 | 6  | 10 | 3 | 3  | 35 | 2  | 3  |
| scaffold85143_619636   | 24 | gacaauaucguacugaggugggac | 0 | 66 | 48 | 5  | 4  | 8 | 7  | 24 | 5  | 19 |
| scaffold182113_1300502 | 21 | cuaaaugcauuuagcaccccc    | 0 | 66 | 56 | 5  | 8  | 2 | 6  | 24 | 16 | 16 |
| scaffold325115_2322850 | 24 | uaccgauggaccagagauugugc  | 0 | 66 | 57 | 5  | 5  | 8 | 6  | 32 | 9  | 16 |
| scaffold440969_3280252 | 22 | gggacaggccauagaguuggac   | 0 | 66 | 64 | 3  | 4  | 9 | 6  | 5  | 5  | 54 |
| scaffold402633_2909992 | 24 | cagcaucagauaggcuuaggcacc | 0 | 66 | 66 | 4  | 7  | 6 | 7  | 26 | 18 | 22 |
| scaffold208082_1489466 | 24 | ugcaauaggccgaauaugucac   | 0 | 65 | 28 | 5  | 5  | 7 | 7  | 11 | 10 | 7  |
| C15161058_4245045      | 23 | ucaucagucgacugauggcacu   | 0 | 65 | 47 | 6  | 6  | 5 | 6  | 22 | 8  | 17 |
| scaffold121669_877626  | 24 | ugagucacuuacauaaacucgac  | 0 | 64 | 44 | 6  | 6  | 4 | 8  | 23 | 9  | 12 |
| scaffold418080_3045719 | 22 | aggacuucuuucugcuugcuu    | 0 | 64 | 48 | 11 | 5  | 4 | 2  | 15 | 20 | 13 |
| C16937369_4980759      | 24 | agggacaaauuacuauucaugaac | 0 | 64 | 51 | 6  | 4  | 4 | 10 | 34 | 7  | 10 |
| scaffold92551_672755   | 21 | cuaaaugcauuuagcaccccc    | 0 | 64 | 56 | 5  | 8  | 2 | 6  | 24 | 16 | 16 |
| scaffold285544_2041704 | 21 | cuaaaugcauuuagcaccccc    | 0 | 64 | 56 | 5  | 8  | 2 | 6  | 24 | 16 | 16 |
| scaffold158528_1137284 | 22 | ugugauugauugguuuuuuuc    | 0 | 64 | 56 | 12 | 1  | 5 | 4  | 36 | 19 | 1  |
| C14502518_4062673      | 24 | ucaucagucgacugaguggccauc | 0 | 64 | 59 | 6  | 7  | 6 | 5  | 26 | 15 | 18 |
| C16282533_4642041      | 24 | augcauuuagcaccuucugguugc | 0 | 64 | 64 | 9  | 6  | 5 | 4  | 23 | 22 | 19 |
| C14833834_4151755      | 24 | aggccuggcaauuuugacacgac  | 0 | 63 | 55 | 5  | 6  | 6 | 7  | 18 | 23 | 14 |
| scaffold50107_370197   | 24 | ucucaucaguuggccuuaggcac  | 0 | 63 | 59 | 7  | 7  | 6 | 4  | 22 | 15 | 22 |
| scaffold387779_2788899 | 21 | cuaaaugcauuuagcaccccc    | 0 | 63 | 59 | 5  | 8  | 2 | 6  | 22 | 16 | 21 |
| scaffold127219_917396  | 24 | auaccugguccguguagagggac  | 0 | 63 | 61 | 5  | 6  | 8 | 5  | 19 | 9  | 33 |
| scaffold446178_3347518 | 24 | cgcaaaagcugcguaaaagggacc | 0 | 63 | 62 | 2  | 6  | 7 | 9  | 31 | 8  | 23 |

|                        |    |                           |   |    |    |    |    |   |   |    |    |    |
|------------------------|----|---------------------------|---|----|----|----|----|---|---|----|----|----|
| scaffold33173_247578   | 24 | ucuagagccagcggugaguagccc  | 0 | 63 | 62 | 4  | 7  | 8 | 5 | 12 | 35 | 15 |
| scaffold151540_1088151 | 23 | gagcacaagccaucagucgacug   | 0 | 63 | 63 | 3  | 7  | 6 | 7 | 13 | 16 | 34 |
| C14677030_4108880      | 24 | uguacaacucauuuaugcaccgg   | 0 | 63 | 63 | 6  | 7  | 4 | 7 | 15 | 18 | 30 |
| C14677028_4108888      | 24 | uguacaacucauuuaugcaccgg   | 0 | 63 | 63 | 6  | 7  | 4 | 7 | 15 | 18 | 30 |
| C15161058_4245046      | 23 | ucaucagucgacugauggcacu    | 0 | 62 | 47 | 6  | 6  | 5 | 6 | 22 | 8  | 17 |
| scaffold75837_552722   | 22 | ccaucugcugaugaauguugc     | 0 | 62 | 48 | 8  | 5  | 5 | 4 | 33 | 9  | 6  |
| scaffold16688_126140   | 20 | cugggauaaguugauuagg       | 0 | 62 | 48 | 7  | 1  | 7 | 5 | 9  | 26 | 13 |
| scaffold4252_32206     | 21 | cuaaaugcauuuagcaccccc     | 0 | 62 | 55 | 5  | 8  | 2 | 6 | 18 | 16 | 21 |
| C14104741_3962662      | 24 | cgcccugagugaugacuuccu     | 0 | 62 | 55 | 6  | 8  | 6 | 4 | 10 | 17 | 28 |
| scaffold28336_211854   | 24 | agggcggaacuagagcaggcacc   | 0 | 62 | 59 | 2  | 6  | 9 | 7 | 13 | 33 | 13 |
| scaffold223446_1598044 | 24 | caucagucgacugagccucagccc  | 0 | 62 | 60 | 4  | 10 | 5 | 5 | 16 | 10 | 34 |
| scaffold230139_1646551 | 24 | uuuucauuuuguuagacuugcc    | 0 | 62 | 61 | 12 | 4  | 3 | 5 | 16 | 27 | 18 |
| scaffold201514_1441718 | 21 | cuaaaugcauuuagcaccccc     | 0 | 62 | 62 | 5  | 8  | 2 | 6 | 23 | 17 | 22 |
| scaffold4252_32205     | 21 | cuaaaugcauuuagcaccccc     | 0 | 62 | 62 | 5  | 8  | 2 | 6 | 23 | 17 | 22 |
| scaffold84945_618041   | 24 | agccaucagucgacuaauggacc   | 0 | 61 | 43 | 4  | 8  | 5 | 7 | 18 | 9  | 16 |
| scaffold414557_3013753 | 24 | cuggaguauuucauuuagacuc    | 0 | 61 | 55 | 9  | 4  | 4 | 7 | 21 | 15 | 19 |
| scaffold141417_1016703 | 21 | auuuucauugauguagaccu      | 0 | 61 | 56 | 9  | 3  | 4 | 5 | 18 | 8  | 30 |
| scaffold163721_1173607 | 24 | guuuuacuauuagauuuggauuacc | 0 | 61 | 60 | 10 | 3  | 4 | 7 | 28 | 19 | 13 |
| scaffold447239_3362309 | 20 | aaauucgucacuaaagggcc      | 0 | 61 | 61 | 4  | 5  | 4 | 7 | 33 | 28 | 0  |
| scaffold250828_1801677 | 21 | cuaaaugcauuuagcaccccc     | 0 | 60 | 59 | 5  | 8  | 2 | 6 | 22 | 16 | 21 |
| scaffold96645_702144   | 22 | uccaaggaaaucuuucugug      | 0 | 60 | 59 | 7  | 4  | 4 | 7 | 35 | 19 | 5  |
| scaffold123819_892530  | 18 | ggguuuuacucagcaaac        | 0 | 60 | 60 | 4  | 4  | 4 | 6 | 53 | 7  | 0  |
| C16433126_4709412      | 23 | augaauucuggugcauuuaaugc   | 0 | 60 | 60 | 8  | 3  | 5 | 7 | 27 | 10 | 23 |
| scaffold335765_2398957 | 24 | ccuacuaaaggggaacguaggccu  | 0 | 59 | 48 | 4  | 6  | 7 | 7 | 13 | 11 | 24 |
| scaffold178922_1278750 | 21 | cuaaaugcauuuagcaccccc     | 0 | 59 | 55 | 5  | 8  | 2 | 6 | 21 | 18 | 16 |
| C15036058_4209037      | 24 | uucaucagcaccgugcaugcgecc  | 0 | 59 | 55 | 5  | 10 | 5 | 4 | 12 | 20 | 23 |

|                        |    |                          |   |    |    |    |   |    |    |    |    |    |
|------------------------|----|--------------------------|---|----|----|----|---|----|----|----|----|----|
| C15211171_4259839      | 21 | cuuuugagucgaucuuggcgg    | 0 | 59 | 59 | 8  | 4 | 7  | 2  | 0  | 0  | 59 |
| C15732603_4428581      | 20 | uuaacaugugcccuaggac      | 0 | 59 | 59 | 6  | 5 | 4  | 5  | 27 | 22 | 10 |
| C16811321_4904202      | 24 | aauguuuacucaguuccuaggaac | 0 | 58 | 25 | 8  | 5 | 4  | 7  | 16 | 5  | 4  |
| scaffold430811_3169213 | 23 | uauauguguucaccuguggucu   | 0 | 58 | 29 | 10 | 4 | 6  | 3  | 8  | 10 | 11 |
| scaffold164129_1176563 | 24 | cagaaggugcuaaaugcauuuagc | 0 | 58 | 35 | 6  | 4 | 6  | 8  | 10 | 16 | 9  |
| scaffold360467_2581126 | 24 | ucauauugcagugaaauauagacu | 0 | 58 | 43 | 8  | 3 | 4  | 9  | 7  | 12 | 24 |
| C16468474_4725787      | 24 | aacggaugaauuuuuuuugaaac  | 0 | 58 | 56 | 9  | 2 | 4  | 9  | 27 | 10 | 19 |
| C16355495_4673999      | 21 | cuaaaugcauuuagcaccccc    | 0 | 58 | 56 | 5  | 8 | 2  | 6  | 22 | 16 | 18 |
| scaffold56008_413138   | 24 | aagucgaauuuuugaagugcacu  | 0 | 58 | 57 | 8  | 3 | 5  | 8  | 25 | 18 | 14 |
| C16405056_4696534      | 23 | uggccauugauaguauuuacuca  | 0 | 58 | 58 | 9  | 4 | 4  | 6  | 21 | 14 | 23 |
| scaffold38663_287664   | 24 | uuuauguaauucuuugagauuccc | 0 | 58 | 58 | 12 | 4 | 3  | 5  | 28 | 19 | 11 |
| scaffold412335_2994098 | 24 | agagugaucacuuaggccuggcuc | 0 | 58 | 58 | 6  | 6 | 7  | 5  | 29 | 24 | 5  |
| scaffold204852_1465539 | 24 | agagugaucacuuaggccuggcuc | 0 | 58 | 58 | 6  | 6 | 7  | 5  | 29 | 24 | 5  |
| C16540250_4759815      | 24 | uaauacugggacuaacuuauuacc | 0 | 57 | 42 | 7  | 5 | 3  | 9  | 21 | 17 | 4  |
| scaffold93370_679469   | 21 | cuaaaugcauuuagcaccccc    | 0 | 57 | 51 | 5  | 8 | 2  | 6  | 21 | 16 | 14 |
| C14028801_3944562      | 24 | cguauacggaauuuuuuuuggac  | 0 | 57 | 55 | 9  | 3 | 5  | 7  | 22 | 15 | 18 |
| scaffold439336_3261307 | 24 | auauugacuuggcacauaugcacc | 0 | 57 | 55 | 7  | 6 | 4  | 7  | 14 | 21 | 20 |
| C14050081_3949510      | 23 | cacguggaucucacgcgagggc   | 0 | 57 | 57 | 3  | 8 | 8  | 4  | 45 | 12 | 0  |
| scaffold129599_935280  | 24 | gucgaguucgugucggguuagcgu | 0 | 57 | 57 | 8  | 4 | 10 | 2  | 16 | 16 | 25 |
| scaffold78578_571706   | 24 | cgacugaugcuucagaaauagcc  | 0 | 56 | 43 | 6  | 6 | 5  | 7  | 23 | 8  | 12 |
| scaffold93370_679470   | 21 | cuaaaugcauuuagcaccccc    | 0 | 56 | 48 | 5  | 8 | 2  | 6  | 20 | 15 | 13 |
| scaffold290026_2072882 | 22 | auaccuaauuacaacugcuagu   | 0 | 56 | 50 | 7  | 5 | 2  | 8  | 9  | 15 | 26 |
| C15838963_4466264      | 24 | aaaccgaauggaaguagauuguu  | 0 | 56 | 53 | 6  | 2 | 6  | 10 | 35 | 18 | 0  |
| scaffold19725_147940   | 21 | cuaaaugcauuuagcaccccc    | 0 | 56 | 54 | 5  | 8 | 2  | 6  | 22 | 15 | 17 |
| C16297251_4648875      | 21 | cuaaaugcauuuagcaccccc    | 0 | 56 | 56 | 5  | 8 | 2  | 6  | 22 | 16 | 18 |
| scaffold360864_2584105 | 21 | cuaaaugcauuuagcaccccc    | 0 | 56 | 56 | 5  | 8 | 2  | 6  | 22 | 16 | 18 |

|                        |    |                          |   |    |    |    |    |   |   |    |    |    |
|------------------------|----|--------------------------|---|----|----|----|----|---|---|----|----|----|
| C14582560_4083808      | 21 | cuaaaugcauuuagcaccccc    | 0 | 56 | 56 | 5  | 8  | 2 | 6 | 24 | 16 | 16 |
| scaffold66149_484780   | 21 | cuaaaugcauuuagcaccccc    | 0 | 56 | 56 | 5  | 8  | 2 | 6 | 24 | 16 | 16 |
| scaffold66149_484779   | 21 | cuaaaugcauuuagcaccccc    | 0 | 56 | 56 | 5  | 8  | 2 | 6 | 24 | 16 | 16 |
| scaffold25987_195293   | 24 | acaucaugugucgugagaaagccc | 0 | 56 | 56 | 5  | 6  | 6 | 7 | 18 | 17 | 21 |
| C17430036_5378072      | 24 | uuuauguaauucuuugagauuccc | 0 | 56 | 56 | 12 | 4  | 3 | 5 | 27 | 18 | 11 |
| scaffold43946_324980   | 24 | aaaugcauuuagcacucccuggac | 0 | 56 | 56 | 6  | 7  | 4 | 7 | 17 | 23 | 16 |
| scaffold190497_1360664 | 24 | aaaugcauuuagcacucccuggac | 0 | 56 | 56 | 6  | 7  | 4 | 7 | 17 | 23 | 16 |
| scaffold311700_2225600 | 23 | gacaaccgaguaagacauuuuca  | 0 | 55 | 54 | 5  | 5  | 4 | 9 | 20 | 7  | 27 |
| C16993365_5017099      | 24 | aggugauggcguuagaggcucaau | 0 | 55 | 55 | 6  | 3  | 9 | 6 | 36 | 11 | 8  |
| scaffold386819_2780840 | 24 | acugguauccccgguccugcaac  | 0 | 55 | 55 | 6  | 9  | 5 | 4 | 27 | 15 | 13 |
| C16130591_4578379      | 24 | acugcguaggcacccuuuugaac  | 0 | 55 | 55 | 6  | 7  | 6 | 5 | 16 | 16 | 23 |
| scaffold178922_1278749 | 21 | cuaaaugcauuuagcaccccc    | 0 | 55 | 55 | 5  | 8  | 2 | 6 | 21 | 18 | 16 |
| scaffold456112_3511441 | 20 | auuuuauugcauccgguaaga    | 0 | 55 | 55 | 6  | 3  | 4 | 7 | 17 | 19 | 19 |
| scaffold12344_92707    | 24 | gcaaaaucguuuuugcacuugggc | 0 | 55 | 55 | 8  | 5  | 6 | 5 | 29 | 20 | 6  |
| scaffold395863_2854589 | 24 | ugagauuuauagcguuaacacgcc | 0 | 54 | 25 | 7  | 5  | 5 | 7 | 13 | 3  | 9  |
| scaffold82523_599748   | 24 | aauguagucacguauacucggccc | 0 | 54 | 25 | 6  | 7  | 5 | 6 | 9  | 15 | 1  |
| C17380388_5329172      | 21 | cacugccucgccguacgagc     | 0 | 54 | 49 | 3  | 10 | 5 | 3 | 24 | 12 | 13 |
| scaffold16168_121925   | 23 | cagagcccaucagucgacuaagc  | 0 | 54 | 50 | 3  | 8  | 5 | 7 | 10 | 19 | 21 |
| C15280075_4280716      | 21 | ugggacggccaugauccugcu    | 0 | 54 | 54 | 5  | 6  | 7 | 3 | 5  | 5  | 44 |
| scaffold94284_685329   | 21 | ugggacggccaugauccugcu    | 0 | 54 | 54 | 5  | 6  | 7 | 3 | 5  | 5  | 44 |
| scaffold410985_2982475 | 22 | uaguuuucggagcucugcauuc   | 0 | 54 | 54 | 9  | 5  | 5 | 3 | 28 | 8  | 18 |
| scaffold199118_1423422 | 24 | ggugaaaggccacgaaaucgagac | 0 | 54 | 54 | 2  | 5  | 8 | 9 | 25 | 16 | 13 |
| scaffold91041_661852   | 21 | uugcuccucugggauccgcc     | 0 | 54 | 54 | 7  | 8  | 5 | 1 | 12 | 19 | 23 |
| scaffold78787_573122   | 20 | auuuuauugcauccgguaaga    | 0 | 54 | 54 | 6  | 3  | 4 | 7 | 17 | 19 | 18 |
| scaffold1559_12238     | 24 | ucaucagucgacugaguggccauc | 0 | 53 | 43 | 6  | 7  | 6 | 5 | 20 | 10 | 13 |
| scaffold144778_1040416 | 24 | cgacugaugcuucagaaauagcc  | 0 | 53 | 44 | 6  | 6  | 5 | 7 | 23 | 8  | 13 |



|                        |    |                          |   |    |    |    |   |    |   |    |    |    |
|------------------------|----|--------------------------|---|----|----|----|---|----|---|----|----|----|
| scaffold206186_1475460 | 23 | ucccguaucgaguacagaacc    | 0 | 53 | 51 | 5  | 7 | 4  | 7 | 22 | 12 | 17 |
| scaffold179360_1281969 | 23 | uauauucuggccaucagucgac   | 0 | 53 | 52 | 7  | 6 | 5  | 5 | 21 | 16 | 15 |
| scaffold117433_849206  | 21 | cuaaaugcauuuagcaccccc    | 0 | 53 | 53 | 5  | 8 | 2  | 6 | 21 | 16 | 16 |
| scaffold86185_627238   | 21 | cuaaaugcauuuagcaccccc    | 0 | 53 | 53 | 5  | 8 | 2  | 6 | 21 | 16 | 16 |
| C16565558_4772480      | 24 | acgaaaaaccgucgcaaaaggucc | 0 | 53 | 53 | 3  | 7 | 5  | 9 | 30 | 18 | 5  |
| scaffold210062_1504336 | 24 | acgaaaacugucgcaaaaggucc  | 0 | 53 | 53 | 4  | 6 | 6  | 8 | 18 | 20 | 15 |
| scaffold102306_742777  | 24 | cagaaggugcaaaugcauuuagc  | 0 | 53 | 53 | 6  | 4 | 6  | 8 | 16 | 21 | 16 |
| C16057241_4549270      | 24 | ucugauuaaccggaccgucacac  | 0 | 52 | 40 | 5  | 8 | 5  | 6 | 10 | 12 | 18 |
| scaffold90323_656373   | 24 | gauuauucuuccuugacaaguacc | 0 | 52 | 44 | 8  | 7 | 3  | 6 | 12 | 26 | 6  |
| scaffold225802_1614029 | 24 | ggcucagagcacucaguagcuc   | 0 | 52 | 46 | 4  | 7 | 7  | 6 | 23 | 7  | 16 |
| C17224753_5192506      | 24 | cggcacaacguacucugugggguc | 0 | 52 | 50 | 5  | 7 | 8  | 4 | 23 | 23 | 4  |
| scaffold356874_2554748 | 24 | ggacgguccuuagagaaggggac  | 0 | 52 | 51 | 3  | 4 | 10 | 7 | 13 | 19 | 19 |
| scaffold343963_2465304 | 24 | accgaugcguacucugacgcuu   | 0 | 52 | 52 | 6  | 8 | 6  | 4 | 24 | 12 | 16 |
| scaffold383901_2758731 | 22 | agugaucacuagggccuggcuc   | 0 | 52 | 52 | 5  | 6 | 7  | 4 | 17 | 22 | 13 |
| scaffold60010_441548   | 22 | uuucuaagucugggaguuuccu   | 0 | 52 | 52 | 10 | 4 | 5  | 3 | 28 | 22 | 2  |
| scaffold113596_822068  | 24 | auuguuggcccacuaccuauuagc | 0 | 52 | 52 | 7  | 7 | 4  | 6 | 18 | 23 | 11 |
| scaffold271665_1943320 | 24 | aacaguuucgggucguauuggguc | 0 | 51 | 35 | 8  | 4 | 8  | 4 | 18 | 7  | 10 |
| C15505015_4352118      | 24 | gccuaggcgcgauuuuuagaacac | 0 | 51 | 36 | 6  | 6 | 6  | 6 | 17 | 10 | 9  |
| scaffold54096_399216   | 23 | ucaucagucgacugaugacacu   | 0 | 51 | 48 | 6  | 6 | 5  | 6 | 22 | 8  | 18 |
| C14557096_4076991      | 24 | auauuacuuuauacugcuagacc  | 0 | 51 | 50 | 8  | 5 | 2  | 9 | 22 | 9  | 19 |
| C16865757_4936581      | 24 | cuccuaaggaccgaguauugcacc | 0 | 51 | 50 | 5  | 7 | 6  | 6 | 24 | 12 | 14 |
| C16131977_4578853      | 24 | cuccuaaggaccgaguauugcacc | 0 | 51 | 50 | 5  | 7 | 6  | 6 | 24 | 12 | 14 |
| C14595172_4087008      | 23 | uaaaugcauuuagcaccaccuga  | 0 | 51 | 51 | 6  | 6 | 3  | 8 | 22 | 9  | 20 |
| scaffold166564_1192829 | 24 | uaccgacuggccaauuuaccuuu  | 0 | 51 | 51 | 7  | 7 | 3  | 7 | 13 | 11 | 27 |
| C13290087_3758179      | 23 | ggcaccgcaaaggcucagagcuc  | 0 | 51 | 51 | 2  | 8 | 7  | 6 | 11 | 13 | 27 |
| scaffold83922_610394   | 24 | ucagucgacuaaggagccuugcuc | 0 | 51 | 51 | 6  | 7 | 6  | 5 | 25 | 13 | 13 |

|                        |    |                           |   |    |    |    |   |   |    |    |    |    |
|------------------------|----|---------------------------|---|----|----|----|---|---|----|----|----|----|
| C16681140_4831705      | 24 | ggugaaaggccacgaaaugcagac  | 0 | 51 | 51 | 2  | 5 | 8 | 9  | 22 | 16 | 13 |
| scaffold157703_1131784 | 24 | gcuuagguacugcuuaacgacgcc  | 0 | 50 | 23 | 6  | 7 | 6 | 5  | 4  | 5  | 14 |
| scaffold414757_3015695 | 24 | aaaauaggagugcaauaugaacu   | 0 | 50 | 27 | 6  | 2 | 5 | 11 | 15 | 3  | 9  |
| scaffold377364_2707426 | 23 | aaucguggauucuguuagucu     | 0 | 50 | 43 | 10 | 3 | 5 | 5  | 11 | 3  | 29 |
| scaffold379155_2721561 | 21 | uggcacaugggaucugugcc      | 0 | 50 | 49 | 5  | 6 | 7 | 3  | 0  | 0  | 49 |
| scaffold440932_3279808 | 22 | aaugaaaacagaacaaaaguuc    | 0 | 50 | 50 | 3  | 3 | 3 | 13 | 34 | 16 | 0  |
| C13853133_3902832      | 23 | ccaccaauuuuaucaaaaauu     | 0 | 49 | 11 | 7  | 5 | 0 | 11 | 1  | 0  | 10 |
| scaffold329268_2352800 | 24 | acugcaauaugaacuuguagucc   | 0 | 49 | 29 | 8  | 5 | 4 | 7  | 7  | 11 | 11 |
| scaffold71859_524637   | 24 | cagaaggugcuaaaugcauuuagc  | 0 | 49 | 40 | 6  | 4 | 6 | 8  | 12 | 16 | 12 |
| scaffold47596_351264   | 24 | gauuccuaguagggcuacugacu   | 0 | 49 | 45 | 8  | 5 | 6 | 5  | 27 | 13 | 5  |
| C14685852_4111376      | 23 | aucagucgacugaugagcacugu   | 0 | 49 | 47 | 6  | 5 | 6 | 6  | 22 | 8  | 17 |
| scaffold313139_2236163 | 24 | cuauugcacugagauaauguacac  | 0 | 49 | 48 | 7  | 5 | 4 | 8  | 27 | 3  | 18 |
| scaffold70634_516173   | 24 | auggguuaguagcaccaggucu    | 0 | 49 | 48 | 7  | 5 | 7 | 5  | 18 | 13 | 17 |
| scaffold39255_292411   | 24 | uuugacuguauggucuaaaauacc  | 0 | 49 | 48 | 9  | 4 | 4 | 7  | 24 | 16 | 8  |
| scaffold170432_1219670 | 23 | uccagaaccauguagucgacuac   | 0 | 49 | 48 | 5  | 7 | 4 | 7  | 7  | 17 | 24 |
| scaffold254886_1822231 | 24 | gcacaccaacuguauuuauugcac  | 0 | 49 | 48 | 6  | 7 | 3 | 8  | 13 | 19 | 16 |
| C16334343_4664324      | 24 | agucucuuaagaugauuucggcc   | 0 | 49 | 48 | 9  | 5 | 5 | 5  | 7  | 24 | 17 |
| scaffold152944_1097919 | 24 | aaauaggauugcaauaugaacuuu  | 0 | 49 | 49 | 9  | 2 | 4 | 9  | 17 | 10 | 22 |
| C17289277_5248250      | 24 | uuugauaccauguuaagaaccauc  | 0 | 49 | 49 | 8  | 5 | 3 | 8  | 26 | 14 | 9  |
| scaffold202031_1444704 | 20 | cccgagauggccaaaauuga      | 0 | 48 | 30 | 4  | 5 | 5 | 6  | 17 | 4  | 9  |
| scaffold193048_1379612 | 24 | guucgguucgcgaaauugagcacc  | 0 | 48 | 33 | 7  | 6 | 7 | 4  | 15 | 13 | 5  |
| scaffold237475_1698125 | 24 | uuuacagauucggucuuuugacac  | 0 | 48 | 37 | 9  | 5 | 4 | 6  | 21 | 8  | 8  |
| C16908507_4963018      | 24 | aauggcuuuuuagucucuuaagc   | 0 | 48 | 37 | 10 | 4 | 5 | 5  | 21 | 9  | 7  |
| C16781717_4886763      | 24 | acaucaugugucguggaaggcucc  | 0 | 48 | 40 | 6  | 6 | 7 | 5  | 16 | 14 | 10 |
| scaffold3089_24072     | 20 | uaaauugcauuuagcaccuuc     | 0 | 48 | 41 | 7  | 5 | 2 | 6  | 19 | 10 | 12 |
| scaffold191840_1371043 | 24 | aucacugauaccacuuuuuuuuuac | 0 | 48 | 42 | 7  | 6 | 1 | 10 | 15 | 12 | 15 |

|                        |    |                          |   |    |    |    |   |    |    |    |    |    |
|------------------------|----|--------------------------|---|----|----|----|---|----|----|----|----|----|
| C17156750_5136630      | 24 | guaccaacucugaccuugcuucuc | 0 | 48 | 44 | 8  | 9 | 3  | 4  | 8  | 16 | 20 |
| scaffold458636_3573042 | 24 | uucgaguacuaaaauucgugaacc | 0 | 48 | 46 | 7  | 5 | 4  | 8  | 25 | 11 | 10 |
| C13952033_3925791      | 23 | auaaccaugaagcuuguagcaac  | 0 | 48 | 47 | 5  | 5 | 4  | 9  | 32 | 13 | 2  |
| scaffold376851_2703060 | 24 | uuuacauaaaucuuagcacucac  | 0 | 48 | 47 | 8  | 6 | 1  | 9  | 20 | 15 | 12 |
| scaffold458375_3565280 | 24 | uuuauguaauucuuugagauuccc | 0 | 48 | 47 | 12 | 4 | 3  | 5  | 22 | 15 | 10 |
| scaffold333710_2384429 | 22 | gaguuaaguaacacuuuugacc   | 0 | 48 | 47 | 7  | 5 | 4  | 6  | 28 | 19 | 0  |
| scaffold36050_268013   | 24 | cagagugaucacuagggccugccu | 0 | 48 | 48 | 5  | 7 | 7  | 5  | 12 | 15 | 21 |
| C15500595_4350641      | 23 | uccagaaccauguagucgacuac  | 0 | 48 | 48 | 5  | 7 | 4  | 7  | 7  | 17 | 24 |
| scaffold206626_1478870 | 24 | aauguuuacucaguuccuaggaac | 0 | 47 | 25 | 8  | 5 | 4  | 7  | 16 | 5  | 4  |
| scaffold111083_804367  | 22 | ccccgucaggugccugagcauc   | 0 | 47 | 29 | 4  | 9 | 6  | 3  | 7  | 20 | 2  |
| scaffold1494_12461     | 22 | aggagaauucgaugguuaccuc   | 0 | 47 | 40 | 6  | 4 | 6  | 6  | 12 | 6  | 22 |
| scaffold90577_662334   | 19 | aggaaccgaguuaaggcuuu     | 0 | 47 | 45 | 5  | 3 | 6  | 5  | 15 | 17 | 13 |
| scaffold419246_3056428 | 22 | ugcauauugugaggcuguccuu   | 0 | 47 | 46 | 9  | 4 | 6  | 3  | 46 | 0  | 0  |
| scaffold339800_2427731 | 23 | ucaucagucgacugaugagcacu  | 0 | 47 | 47 | 6  | 6 | 5  | 6  | 22 | 8  | 17 |
| scaffold173205_1239201 | 21 | cuaaaugcauuuagcaccuc     | 0 | 47 | 47 | 6  | 7 | 2  | 6  | 14 | 17 | 16 |
| C17356828_5308561      | 21 | auuuggucuaaaacuugguc     | 0 | 47 | 47 | 9  | 3 | 4  | 5  | 23 | 22 | 2  |
| C15627185_4392781      | 22 | ucuagaugaagcuggacuuuc    | 0 | 46 | 33 | 8  | 4 | 5  | 5  | 22 | 10 | 1  |
| C14937440_4181059      | 24 | gcaaaagucguuuugcagcugggc | 0 | 46 | 37 | 6  | 5 | 8  | 5  | 21 | 6  | 10 |
| scaffold234163_1675442 | 22 | uagccagugacaaaauuccacu   | 0 | 46 | 37 | 6  | 6 | 3  | 7  | 18 | 12 | 7  |
| scaffold122125_880737  | 24 | ggccggacuugagaauucgggggc | 0 | 46 | 42 | 4  | 5 | 11 | 4  | 19 | 7  | 16 |
| scaffold317541_2268641 | 24 | acacaaaagugucguaaaagccc  | 0 | 46 | 43 | 3  | 6 | 4  | 11 | 22 | 10 | 11 |
| C17049201_5056009      | 22 | ucaauccuguaguuaaccacu    | 0 | 46 | 45 | 7  | 7 | 2  | 6  | 14 | 8  | 23 |
| scaffold454183_3474039 | 24 | auauccauguagaauuacucuauu | 0 | 46 | 45 | 10 | 4 | 2  | 8  | 15 | 11 | 19 |
| C13439638_3796022      | 24 | ggauugcaauaugaacuuuacagu | 0 | 46 | 45 | 8  | 3 | 5  | 8  | 18 | 11 | 16 |
| C15051268_4213262      | 24 | agaaccguuagaaccguuaauau  | 0 | 46 | 46 | 6  | 4 | 4  | 10 | 18 | 11 | 17 |
| scaffold322873_2306495 | 21 | gguuugucuuucacucucacc    | 0 | 45 | 39 | 9  | 7 | 3  | 2  | 14 | 19 | 6  |

|                        |    |                           |   |    |    |    |    |   |    |    |    |    |
|------------------------|----|---------------------------|---|----|----|----|----|---|----|----|----|----|
| scaffold367015_2630754 | 24 | ucaacccgauuagaccgcacc     | 0 | 45 | 42 | 4  | 11 | 3 | 6  | 8  | 12 | 22 |
| scaffold344185_2459770 | 24 | ucaccgaguacaacuuuuugaac   | 0 | 45 | 44 | 7  | 6  | 3 | 8  | 16 | 6  | 22 |
| scaffold82323_598526   | 21 | cuaaaugcauuuagcaccuc      | 0 | 45 | 44 | 6  | 7  | 2 | 6  | 13 | 17 | 14 |
| C13173498_3729130      | 21 | cuaaaugcauuuagcaccuc      | 0 | 45 | 44 | 6  | 7  | 2 | 6  | 13 | 17 | 14 |
| C13692223_3861656      | 21 | cuaaaugcauuuagcaccuc      | 0 | 45 | 44 | 6  | 7  | 2 | 6  | 13 | 17 | 14 |
| scaffold19694_147772   | 24 | accugaucaguguauugaugacac  | 0 | 45 | 44 | 7  | 5  | 5 | 7  | 21 | 17 | 6  |
| scaffold389972_2806229 | 24 | uuuucuaaucauuagacuuugcc   | 0 | 45 | 45 | 11 | 5  | 2 | 6  | 16 | 13 | 16 |
| scaffold163104_1169602 | 24 | gagucuuuuguagaccguaguacc  | 0 | 45 | 45 | 7  | 6  | 6 | 5  | 27 | 17 | 1  |
| scaffold255628_1827595 | 24 | aaugcauuaaaguguuguacuuuu  | 0 | 44 | 27 | 11 | 2  | 4 | 7  | 13 | 7  | 7  |
| scaffold295211_2108840 | 24 | ugccaagguucaaccuucgacc    | 0 | 44 | 30 | 5  | 9  | 5 | 5  | 12 | 11 | 7  |
| scaffold365911_2621916 | 24 | aagauuuggcucuguaaggaauc   | 0 | 44 | 39 | 8  | 3  | 6 | 7  | 13 | 12 | 14 |
| C16425268_4705841      | 23 | aauaaguucuaaggcauuugaauu  | 0 | 44 | 42 | 8  | 2  | 4 | 9  | 17 | 9  | 16 |
| scaffold199379_1424851 | 24 | caaaauugguccgugauuugcacc  | 0 | 44 | 44 | 8  | 6  | 5 | 5  | 2  | 5  | 37 |
| scaffold363552_2606190 | 24 | agccaugaucgaucaugggccugg  | 0 | 44 | 44 | 5  | 6  | 8 | 5  | 13 | 10 | 21 |
| scaffold351836_2519252 | 24 | agccaugaucgaucaugggccugg  | 0 | 44 | 44 | 5  | 6  | 8 | 5  | 13 | 10 | 21 |
| C16669252_4825425      | 24 | uccuugagacccauauaugucac   | 0 | 44 | 44 | 7  | 7  | 4 | 6  | 13 | 13 | 18 |
| scaffold238290_1704003 | 24 | ucucuaauccggcacaucaaacac  | 0 | 44 | 44 | 5  | 9  | 2 | 8  | 20 | 14 | 10 |
| scaffold120087_867698  | 24 | cagaaggugcuaaaugcauuuagc  | 0 | 43 | 35 | 6  | 4  | 6 | 8  | 9  | 16 | 10 |
| scaffold6066_45907     | 22 | ugggugacccccugggaagcug    | 0 | 43 | 37 | 4  | 6  | 9 | 3  | 2  | 6  | 29 |
| scaffold448933_3387104 | 24 | aaaauaugaaauugcaauaugaacu | 0 | 43 | 38 | 7  | 2  | 3 | 12 | 22 | 9  | 7  |
| scaffold456093_3510971 | 24 | agacgagaacaaaauuuugaauuu  | 0 | 43 | 40 | 7  | 2  | 4 | 11 | 18 | 3  | 19 |
| scaffold428970_3150550 | 24 | caacuugacaacuugucuuccacc  | 0 | 43 | 40 | 7  | 9  | 2 | 6  | 20 | 4  | 16 |
| scaffold260580_1862857 | 23 | ccuugaccgaagucaucaaac     | 0 | 43 | 41 | 5  | 7  | 3 | 8  | 14 | 6  | 21 |
| C13543598_3822650      | 22 | uuugucgcgcacaacugacc      | 0 | 43 | 41 | 5  | 7  | 5 | 5  | 16 | 23 | 2  |
| scaffold276055_1974356 | 21 | aguuaacuuugcacuccuuuu     | 0 | 43 | 42 | 10 | 5  | 2 | 4  | 10 | 10 | 22 |
| scaffold102059_739851  | 24 | gagaggaauuuuucuuacgagaac  | 0 | 43 | 42 | 7  | 3  | 6 | 8  | 19 | 10 | 13 |



|                        |    |                           |   |    |    |    |   |   |    |    |    |    |
|------------------------|----|---------------------------|---|----|----|----|---|---|----|----|----|----|
| C16967817_5000007      | 24 | auuagauuucggagcauccaacuc  | 0 | 41 | 39 | 7  | 6 | 4 | 7  | 12 | 13 | 14 |
| C15052548_4213652      | 24 | uucgucgucuaaagaauaucuagg  | 0 | 41 | 40 | 9  | 4 | 5 | 6  | 0  | 0  | 40 |
| C14724760_4121791      | 22 | auacucugauucugacugggcc    | 0 | 41 | 40 | 7  | 6 | 5 | 4  | 2  | 1  | 37 |
| scaffold453029_3452285 | 24 | cgagagcuuuggcuugagugccac  | 0 | 41 | 40 | 6  | 6 | 8 | 4  | 23 | 6  | 11 |
| scaffold38349_285630   | 24 | gauuauguaggugcauuuaagaac  | 0 | 41 | 40 | 8  | 2 | 6 | 8  | 23 | 7  | 10 |
| C17241885_5207159      | 24 | aaaaacgagacucuaauuaaaau   | 0 | 41 | 40 | 7  | 3 | 2 | 12 | 20 | 8  | 12 |
| scaffold35530_264917   | 22 | aauggaugaggagaugaagucc    | 0 | 41 | 40 | 4  | 2 | 8 | 8  | 25 | 14 | 1  |
| scaffold445045_3332034 | 24 | gcgaaaugauagguacuuccacc   | 0 | 41 | 40 | 6  | 6 | 5 | 7  | 18 | 20 | 2  |
| scaffold351376_2513980 | 24 | augucgccuaagugcucucuagg   | 0 | 41 | 41 | 8  | 6 | 6 | 4  | 0  | 0  | 41 |
| scaffold235588_1685268 | 24 | guuaagacuggaccagaccggacc  | 0 | 41 | 41 | 3  | 7 | 7 | 7  | 20 | 3  | 18 |
| scaffold281094_2009742 | 24 | uuuaaaauuuuguaguuaaccacu  | 0 | 41 | 41 | 11 | 4 | 2 | 7  | 24 | 8  | 9  |
| scaffold404520_2925531 | 23 | uauuaccuuucuaacauaguagaa  | 0 | 41 | 41 | 9  | 4 | 2 | 8  | 14 | 9  | 18 |
| scaffold379998_2728580 | 24 | auguacaacucauuuaugcacucg  | 0 | 41 | 41 | 7  | 6 | 3 | 8  | 14 | 9  | 18 |
| scaffold135510_976225  | 24 | uggaccgaaaugaguguuaagacc  | 0 | 41 | 41 | 5  | 4 | 7 | 8  | 22 | 10 | 9  |
| scaffold261947_1872458 | 24 | uuuuuauuguccauguagaauuacu | 0 | 41 | 41 | 12 | 3 | 3 | 6  | 10 | 11 | 20 |
| C15063402_4216869      | 22 | uuugucgcgcgacaaacugacc    | 0 | 41 | 41 | 5  | 7 | 5 | 5  | 17 | 24 | 0  |
| scaffold176060_1258752 | 24 | cacaugucgggcaggauacgcgcc  | 0 | 40 | 30 | 3  | 8 | 8 | 5  | 8  | 10 | 12 |
| scaffold239190_1709922 | 23 | aaaggaggccgcgugaacgaccg   | 0 | 40 | 36 | 1  | 6 | 9 | 7  | 7  | 17 | 12 |
| scaffold281868_2015357 | 24 | acuacaugguguagucgacucacc  | 0 | 40 | 37 | 6  | 7 | 5 | 6  | 13 | 7  | 17 |
| scaffold416720_3033561 | 20 | cuaaaugcauuuagcacccc      | 0 | 40 | 37 | 5  | 7 | 2 | 6  | 13 | 12 | 12 |
| scaffold22925_171322   | 20 | cuaaaugcauuuagcacccc      | 0 | 40 | 37 | 5  | 7 | 2 | 6  | 13 | 12 | 12 |
| C14576554_4082123      | 21 | ugccaauggauuuauaucucu     | 0 | 40 | 39 | 9  | 4 | 3 | 5  | 8  | 3  | 28 |
| C14315605_4014444      | 24 | acucuauggucuguagggggaccc  | 0 | 40 | 39 | 6  | 6 | 8 | 4  | 20 | 12 | 7  |
| scaffold349683_2500957 | 24 | gauaaccagaguuggaccuccauc  | 0 | 40 | 39 | 5  | 7 | 5 | 7  | 11 | 17 | 11 |
| scaffold453029_3452286 | 24 | cgagagcuuuggcuugagugccac  | 0 | 40 | 40 | 6  | 6 | 8 | 4  | 23 | 6  | 11 |
| C15167580_4246897      | 24 | cuuccaguuuugcuguagaggcgcc | 0 | 40 | 40 | 7  | 7 | 7 | 3  | 12 | 7  | 21 |

|                        |    |                          |   |    |    |    |   |    |   |    |    |    |
|------------------------|----|--------------------------|---|----|----|----|---|----|---|----|----|----|
| scaffold145131_1042781 | 24 | cuuccaguuugcuguagaggcgcc | 0 | 40 | 40 | 7  | 7 | 7  | 3 | 12 | 7  | 21 |
| scaffold49502_365213   | 23 | gauuccguucgaguuaacucua   | 0 | 40 | 40 | 8  | 6 | 4  | 5 | 10 | 12 | 18 |
| C16108989_4569916      | 24 | acgugucgggcaagauacgcgcc  | 0 | 40 | 40 | 3  | 8 | 8  | 5 | 13 | 13 | 14 |
| C16777739_4884412      | 24 | uacacuacuugguacaauaggacc | 0 | 40 | 40 | 6  | 6 | 4  | 8 | 15 | 14 | 11 |
| scaffold449386_3393193 | 24 | acuaugugauuaguuuuuuggac  | 0 | 39 | 6  | 11 | 2 | 5  | 6 | 5  | 0  | 1  |
| scaffold150731_1082057 | 23 | uucagucuuauuggauuuugcacc | 0 | 39 | 20 | 10 | 5 | 4  | 4 | 10 | 3  | 7  |
| scaffold452335_3439928 | 24 | ccugagaccuagcgagcuaacugc | 0 | 39 | 22 | 4  | 8 | 6  | 6 | 4  | 18 | 0  |
| C12862599_3652882      | 24 | gagauaagaguagauuuuugcgc  | 0 | 39 | 31 | 6  | 2 | 8  | 8 | 21 | 7  | 3  |
| scaffold118372_855735  | 24 | accuuaggagacguacauugacc  | 0 | 39 | 35 | 5  | 7 | 5  | 7 | 12 | 15 | 8  |
| C16643696_4812118      | 24 | cggugggguuggugagggcuagc  | 0 | 39 | 36 | 6  | 4 | 12 | 2 | 19 | 10 | 7  |
| scaffold457881_3552331 | 20 | cuucccgguugaauuuuuug     | 0 | 39 | 36 | 10 | 4 | 4  | 2 | 8  | 20 | 8  |
| scaffold133684_963102  | 24 | uucguuuugggugaguaaggcucc | 0 | 39 | 37 | 9  | 4 | 8  | 3 | 17 | 17 | 3  |
| scaffold231500_1656574 | 22 | aaagguugcuaugaaaucuu     | 0 | 39 | 38 | 7  | 2 | 5  | 8 | 19 | 7  | 12 |
| scaffold136400_982294  | 24 | uguuaccuguggugcuaaaaccu  | 0 | 39 | 38 | 8  | 6 | 5  | 5 | 12 | 12 | 14 |
| scaffold387917_2789929 | 24 | uguuaccuguggugcuaaaaccu  | 0 | 39 | 38 | 8  | 6 | 5  | 5 | 12 | 12 | 14 |
| scaffold275085_1967217 | 24 | auugacaauaccuuacucggcgcc | 0 | 39 | 38 | 6  | 8 | 4  | 6 | 18 | 12 | 8  |
| scaffold242575_1733940 | 21 | aaaagaucaucuccagcuugc    | 0 | 39 | 38 | 5  | 6 | 3  | 7 | 23 | 15 | 0  |
| C12908563_3664025      | 21 | aaaagaucaucuccagcuugc    | 0 | 39 | 38 | 5  | 6 | 3  | 7 | 23 | 15 | 0  |
| scaffold235614_1685518 | 21 | auucgucaccaaaggccggu     | 0 | 39 | 39 | 4  | 6 | 6  | 5 | 9  | 3  | 27 |
| scaffold456299_3515925 | 24 | agcacuccacuuuaguacucuagc | 0 | 39 | 39 | 7  | 8 | 3  | 6 | 5  | 11 | 23 |
| scaffold339228_2424052 | 24 | cagaaggugcuaaaugcauuuagc | 0 | 39 | 39 | 6  | 4 | 6  | 8 | 12 | 16 | 11 |
| C15333371_4297493      | 24 | acguagguaacuaguucgucgcc  | 0 | 39 | 39 | 6  | 6 | 6  | 6 | 13 | 19 | 7  |
| scaffold1268_10140     | 24 | aggcaucagucgauugaguaaagc | 0 | 38 | 9  | 5  | 4 | 7  | 8 | 9  | 0  | 0  |
| scaffold92181_673741   | 24 | aaaucguguuaaucggguugacc  | 0 | 38 | 12 | 7  | 5 | 6  | 6 | 2  | 8  | 2  |
| scaffold280246_2003887 | 22 | gcucagggccgaucucuucc     | 0 | 38 | 23 | 6  | 9 | 5  | 2 | 3  | 7  | 13 |
| scaffold261947_1872460 | 24 | uuuuuauguccauguagaauuacu | 0 | 38 | 32 | 12 | 3 | 3  | 6 | 8  | 8  | 16 |

|                        |    |                            |   |    |    |    |    |   |    |    |    |    |
|------------------------|----|----------------------------|---|----|----|----|----|---|----|----|----|----|
| scaffold341466_2440635 | 22 | auagaaauccucaguugugcug     | 0 | 38 | 35 | 8  | 4  | 5 | 5  | 15 | 5  | 15 |
| C17363152_5314323      | 22 | augauauguccaccucuuaugu     | 0 | 38 | 35 | 9  | 5  | 3 | 5  | 12 | 11 | 12 |
| C14703848_4116218      | 24 | aacaagcgaguaaggaauugagcu   | 0 | 38 | 36 | 4  | 3  | 7 | 10 | 22 | 3  | 11 |
| scaffold285028_2037958 | 24 | ccguacacgacccguugccaggcc   | 0 | 38 | 36 | 3  | 11 | 6 | 4  | 8  | 17 | 11 |
| C16000491_4526904      | 24 | uuuggaccggaccuuugaauucg    | 0 | 38 | 37 | 8  | 5  | 6 | 5  | 5  | 8  | 24 |
| scaffold309939_2212916 | 21 | ucuaucaccuuucuaaugu        | 0 | 38 | 37 | 9  | 6  | 1 | 5  | 15 | 9  | 13 |
| C13035526_3695344      | 24 | cgaaaauuggcacacuaguauagacu | 0 | 38 | 37 | 6  | 5  | 5 | 8  | 19 | 9  | 9  |
| C15025274_4205644      | 24 | guuuucggauugacuuacaccc     | 0 | 38 | 37 | 8  | 6  | 4 | 6  | 19 | 10 | 8  |
| scaffold275593_1971286 | 24 | ccgaagaacaggccaagaccggac   | 0 | 38 | 38 | 0  | 8  | 7 | 9  | 19 | 1  | 18 |
| scaffold275593_1971285 | 24 | ccgaagaacaggccaagaccggac   | 0 | 38 | 38 | 0  | 8  | 7 | 9  | 19 | 1  | 18 |
| scaffold241814_1728778 | 24 | ccgaagaacaggccaagaccggac   | 0 | 38 | 38 | 0  | 8  | 7 | 9  | 19 | 1  | 18 |
| scaffold241814_1728777 | 24 | ccgaagaacaggccaagaccggac   | 0 | 38 | 38 | 0  | 8  | 7 | 9  | 19 | 1  | 18 |
| scaffold330033_2358442 | 24 | acggaauauagguacuucaccc     | 0 | 38 | 38 | 7  | 5  | 4 | 8  | 25 | 7  | 6  |
| scaffold394089_2840108 | 24 | aauuuucaccccgguaguuggac    | 0 | 38 | 38 | 7  | 7  | 5 | 5  | 11 | 11 | 16 |
| scaffold150887_1083520 | 22 | uucacuguaauugaacuuugc      | 0 | 38 | 38 | 9  | 4  | 3 | 6  | 12 | 11 | 15 |
| scaffold161548_1158159 | 24 | cggaaccgaugaaggcuuaaaacc   | 0 | 38 | 38 | 3  | 6  | 6 | 9  | 18 | 12 | 8  |
| scaffold235793_1686968 | 21 | uugacagacgagagagagcac      | 0 | 38 | 38 | 2  | 4  | 7 | 8  | 21 | 15 | 2  |
| scaffold448293_3377496 | 21 | uugccccagcacuuggucugc      | 0 | 38 | 38 | 6  | 8  | 5 | 2  | 8  | 22 | 8  |
| scaffold146357_1051116 | 24 | ucacuuaggagacguacauugacc   | 0 | 37 | 23 | 6  | 6  | 5 | 7  | 6  | 8  | 9  |
| scaffold76558_557757   | 21 | uuuuuugaugaauuuggugg       | 0 | 37 | 23 | 11 | 0  | 6 | 4  | 5  | 12 | 6  |
| scaffold12435_94892    | 22 | ucaauccagcgucucaggguuc     | 0 | 37 | 26 | 6  | 7  | 5 | 4  | 11 | 9  | 6  |
| scaffold445273_3335351 | 24 | cacauugacucggugcaauagagc   | 0 | 37 | 31 | 5  | 6  | 6 | 7  | 8  | 5  | 18 |
| scaffold151015_1084273 | 23 | gcacauacucggucuuuaagggc    | 0 | 37 | 33 | 6  | 6  | 6 | 5  | 9  | 14 | 10 |
| scaffold33013_246341   | 24 | gcacggucucagguucgauucccc   | 0 | 37 | 34 | 6  | 9  | 6 | 3  | 9  | 20 | 5  |
| scaffold164448_1179366 | 24 | cagaaggugcuaaaugcauuuagc   | 0 | 37 | 35 | 6  | 4  | 6 | 8  | 9  | 16 | 10 |
| C13269245_3752969      | 21 | uuuguuucaggaacaagcucg      | 0 | 37 | 37 | 7  | 4  | 5 | 5  | 1  | 2  | 34 |



|                        |    |                          |   |    |    |    |    |    |    |    |    |    |
|------------------------|----|--------------------------|---|----|----|----|----|----|----|----|----|----|
| scaffold87344_635507   | 24 | ccaacugugggugauuauuggccu | 0 | 37 | 37 | 7  | 5  | 8  | 4  | 10 | 6  | 21 |
| scaffold353628_2530668 | 21 | cuuaggaccaauuccaagcu     | 0 | 37 | 37 | 5  | 7  | 3  | 6  | 18 | 10 | 9  |
| scaffold313747_2240911 | 24 | gauuggaugaagaguagguacccc | 0 | 37 | 37 | 5  | 4  | 8  | 7  | 24 | 12 | 1  |
| scaffold256897_1836286 | 24 | aguauugcacauauacucggucc  | 0 | 37 | 37 | 7  | 6  | 5  | 6  | 9  | 13 | 15 |
| C15721445_4424865      | 22 | guggcagugacguggcgcugac   | 0 | 37 | 37 | 4  | 5  | 10 | 3  | 12 | 16 | 9  |
| C17188396_5161590      | 24 | uuuaaugcauggauucuuuuggau | 0 | 36 | 5  | 12 | 2  | 5  | 5  | 1  | 1  | 3  |
| scaffold439495_3263339 | 22 | caccaaauucauaaaaaauu     | 0 | 36 | 19 | 6  | 5  | 0  | 11 | 7  | 6  | 6  |
| scaffold365819_2621380 | 21 | uuuuuugaugaaauuuggugg    | 0 | 36 | 23 | 11 | 0  | 6  | 4  | 5  | 12 | 6  |
| C13430418_3793500      | 24 | gcccaucagucgacugaugaccuc | 0 | 36 | 27 | 5  | 9  | 5  | 5  | 12 | 7  | 8  |
| scaffold27822_208241   | 24 | aguuguagucagguuaaaagcug  | 0 | 36 | 30 | 8  | 2  | 7  | 7  | 10 | 11 | 9  |
| scaffold406541_2943071 | 23 | aaauuugucacaaauuccuucc   | 0 | 36 | 31 | 9  | 6  | 1  | 7  | 9  | 6  | 16 |
| scaffold29609_221989   | 24 | caaugcguagagaagccuaacacc | 0 | 36 | 32 | 3  | 7  | 5  | 9  | 17 | 7  | 8  |
| C16589600_4784681      | 22 | uagaacaucuccacaaauuc     | 0 | 36 | 32 | 6  | 7  | 1  | 8  | 7  | 17 | 8  |
| C17347997_5300536      | 24 | agagugaucuuuagccuggcuc   | 0 | 36 | 33 | 7  | 5  | 7  | 5  | 1  | 5  | 27 |
| C14783520_4138184      | 24 | auuuagcaccuuuugauuguuguc | 0 | 36 | 34 | 12 | 4  | 4  | 4  | 11 | 9  | 14 |
| scaffold109870_795852  | 24 | auuccacucgguucuuuaggacug | 0 | 36 | 35 | 9  | 6  | 5  | 4  | 11 | 4  | 20 |
| scaffold450624_3416582 | 24 | auagagaauacagaaauaucguc  | 0 | 36 | 35 | 5  | 4  | 4  | 11 | 23 | 4  | 8  |
| scaffold99009_718110   | 22 | cggagaauccacaugcaauguc   | 0 | 36 | 35 | 4  | 6  | 5  | 7  | 8  | 10 | 17 |
| scaffold455641_3501946 | 24 | cauuuaggauuccaggaucacc   | 0 | 36 | 35 | 6  | 6  | 4  | 8  | 13 | 15 | 7  |
| scaffold415220_3019791 | 24 | ucgguaaccgaaccgaccaccc   | 0 | 36 | 35 | 2  | 11 | 5  | 6  | 9  | 20 | 6  |
| C13102828_3711960      | 24 | ucgguaaccgaaccgaccaccc   | 0 | 36 | 35 | 2  | 11 | 5  | 6  | 9  | 20 | 6  |
| scaffold148753_1068103 | 24 | gaauggacaacucaaaugcacc   | 0 | 36 | 36 | 4  | 7  | 4  | 9  | 14 | 7  | 15 |
| scaffold379301_2724409 | 24 | accgagagagggaauaacaaucc  | 0 | 36 | 36 | 3  | 5  | 6  | 10 | 18 | 7  | 11 |
| scaffold172682_1235305 | 24 | gccuaggcgcgauuuuugaacac  | 0 | 36 | 36 | 6  | 6  | 6  | 6  | 18 | 10 | 8  |
| scaffold282615_2020669 | 24 | agguauaacucaugaaugcaccc  | 0 | 36 | 36 | 6  | 6  | 4  | 8  | 22 | 10 | 4  |
| scaffold52046_383495   | 24 | uaaaaaggaccaucuguacgaac  | 0 | 36 | 36 | 4  | 5  | 4  | 11 | 18 | 11 | 7  |

|                        |    |                           |   |    |    |    |    |   |    |    |    |    |
|------------------------|----|---------------------------|---|----|----|----|----|---|----|----|----|----|
| scaffold28355_214285   | 24 | agaaccguguagaggugagcccc   | 0 | 36 | 36 | 3  | 6  | 9 | 6  | 15 | 14 | 7  |
| scaffold123163_888309  | 24 | gaccgcgacuggacuggaccagacc | 0 | 36 | 36 | 2  | 9  | 7 | 6  | 17 | 18 | 1  |
| scaffold110460_799672  | 24 | gguacggaccggcccauuuggcac  | 0 | 36 | 36 | 4  | 7  | 9 | 4  | 5  | 27 | 4  |
| scaffold350204_2505199 | 23 | ccacaaaauuuaucaaaaaauu    | 0 | 35 | 12 | 7  | 5  | 0 | 11 | 1  | 0  | 11 |
| scaffold12986_97884    | 20 | uugcuguuugaguuuucgcg      | 0 | 35 | 27 | 10 | 3  | 6 | 1  | 7  | 16 | 4  |
| scaffold23182_173044   | 24 | aucagucgacugaugguccccacu  | 0 | 35 | 29 | 6  | 8  | 5 | 5  | 11 | 6  | 12 |
| scaffold230777_1651410 | 24 | ccuaggaaccgaguguugucauc   | 0 | 35 | 29 | 7  | 6  | 6 | 5  | 8  | 12 | 9  |
| scaffold252811_1807747 | 24 | gagggauuuuggcgccuaggcucc  | 0 | 35 | 33 | 6  | 6  | 9 | 3  | 6  | 5  | 22 |
| scaffold53429_394137   | 24 | uaagcguugacacggauuuggcac  | 0 | 35 | 34 | 6  | 5  | 7 | 6  | 26 | 3  | 5  |
| scaffold92423_671986   | 24 | ucaucagucgacugaguggccuu   | 0 | 35 | 34 | 7  | 6  | 7 | 4  | 5  | 7  | 22 |
| scaffold199152_1423572 | 21 | cauauagcagagauaugugcc     | 0 | 35 | 35 | 5  | 4  | 6 | 6  | 29 | 6  | 0  |
| scaffold10393_77696    | 21 | cauauagcagagauaugugcc     | 0 | 35 | 35 | 5  | 4  | 6 | 6  | 29 | 6  | 0  |
| scaffold333607_2383822 | 24 | gaauggacaacucauauagcacc   | 0 | 35 | 35 | 4  | 7  | 4 | 9  | 13 | 7  | 15 |
| scaffold123810_892447  | 20 | uaaaugcauuuagcaccuuc      | 0 | 35 | 35 | 7  | 5  | 2 | 6  | 16 | 8  | 11 |
| scaffold305922_2184722 | 24 | gccuaggcgcgauuuuagaacac   | 0 | 35 | 35 | 6  | 6  | 6 | 6  | 17 | 10 | 8  |
| scaffold43530_322190   | 24 | caguugacugaugagccuuggcuc  | 0 | 35 | 35 | 7  | 6  | 7 | 4  | 16 | 11 | 8  |
| C17380202_5329433      | 21 | uuucaaucuuguaguuaaccc     | 0 | 35 | 35 | 9  | 5  | 2 | 5  | 14 | 16 | 5  |
| scaffold437077_3235604 | 22 | agagaacaaccaggaggcac      | 0 | 35 | 35 | 1  | 6  | 6 | 9  | 16 | 18 | 1  |
| scaffold210812_1509578 | 22 | caucagucgacugagcaaagcc    | 0 | 34 | 16 | 3  | 7  | 5 | 7  | 2  | 10 | 4  |
| scaffold24127_180561   | 24 | uucagcaugaagauauuugaacu   | 0 | 34 | 29 | 8  | 3  | 4 | 9  | 14 | 3  | 12 |
| scaffold379995_2728245 | 24 | uuuggccaauaccaaccgaccc    | 0 | 34 | 30 | 4  | 10 | 3 | 7  | 10 | 8  | 12 |
| scaffold425434_3115350 | 21 | uuugauuccaacguucgguu      | 0 | 34 | 32 | 9  | 4  | 4 | 4  | 10 | 13 | 9  |
| scaffold92759_674473   | 24 | gaaccguuagaaccguuuuuggcc  | 0 | 34 | 32 | 7  | 6  | 6 | 5  | 6  | 14 | 12 |
| C13656355_3852431      | 24 | ugguauacgaucggucaacucgcc  | 0 | 34 | 33 | 6  | 7  | 6 | 5  | 11 | 7  | 15 |
| C14227629_3993101      | 24 | uuuucugucgcuaaaaacauaccc  | 0 | 34 | 33 | 8  | 7  | 2 | 7  | 14 | 9  | 10 |
| C14691340_4112883      | 22 | ucggcaaccccaauucuguugag   | 0 | 34 | 33 | 6  | 7  | 5 | 4  | 6  | 16 | 11 |

|                        |    |                           |   |    |    |    |   |   |    |    |    |    |
|------------------------|----|---------------------------|---|----|----|----|---|---|----|----|----|----|
| scaffold400616_2893494 | 24 | uuugacacgagacuuccaaaugac  | 0 | 34 | 33 | 6  | 6 | 4 | 8  | 11 | 18 | 4  |
| scaffold73890_539233   | 23 | aaaaccgacugucggcuuaaccg   | 0 | 34 | 34 | 5  | 7 | 5 | 6  | 10 | 2  | 22 |
| scaffold412576_2996455 | 24 | aaguaauucgguaugguacaauac  | 0 | 34 | 34 | 7  | 3 | 5 | 9  | 19 | 8  | 7  |
| C15504557_4352001      | 24 | aaguaauucgguaugguacaauac  | 0 | 34 | 34 | 7  | 3 | 5 | 9  | 19 | 8  | 7  |
| scaffold448395_3378850 | 24 | ugacuggacuuuaggcgacguagu  | 0 | 34 | 34 | 7  | 4 | 8 | 5  | 16 | 11 | 7  |
| scaffold373125_2675613 | 23 | uaggcgacguacuauauaguuuu   | 0 | 34 | 34 | 9  | 4 | 5 | 5  | 21 | 11 | 2  |
| C15977645_4518118      | 23 | uaggcgacguacuauauaguuuu   | 0 | 34 | 34 | 9  | 4 | 5 | 5  | 21 | 11 | 2  |
| C15822195_4460451      | 24 | aauuacuacugguuccuuaggacc  | 0 | 34 | 34 | 8  | 7 | 4 | 5  | 12 | 12 | 10 |
| scaffold104809_758004  | 23 | aaggugaaauaggguaccucg     | 0 | 33 | 19 | 5  | 3 | 8 | 7  | 9  | 3  | 7  |
| scaffold237561_1701118 | 24 | aaaugauuuagcaccucuggac    | 0 | 33 | 25 | 7  | 6 | 4 | 7  | 9  | 7  | 9  |
| scaffold422503_3087120 | 24 | aucuuuggacaauacacuauguau  | 0 | 33 | 28 | 9  | 4 | 3 | 8  | 3  | 3  | 22 |
| C16904631_4960426      | 24 | gcacuuacucgcuugucaucgagc  | 0 | 33 | 28 | 7  | 8 | 5 | 4  | 15 | 11 | 2  |
| scaffold23643_177181   | 24 | acaagucgagguugaaucuggcac  | 0 | 33 | 30 | 5  | 5 | 7 | 7  | 10 | 11 | 9  |
| scaffold306409_2192211 | 24 | aaauucuaacggcuagaacuaccu  | 0 | 33 | 32 | 6  | 6 | 3 | 9  | 12 | 5  | 15 |
| scaffold210962_1510647 | 24 | uuuuuauuguccauguagaauuacu | 0 | 33 | 32 | 12 | 3 | 3 | 6  | 8  | 8  | 16 |
| scaffold425434_3115347 | 21 | uuugauuccaaacguucgguu     | 0 | 33 | 32 | 9  | 4 | 4 | 4  | 10 | 13 | 9  |
| scaffold434150_3204626 | 24 | augaacuuggcagagauaucuc    | 0 | 33 | 32 | 6  | 4 | 6 | 8  | 8  | 17 | 7  |
| scaffold135582_976779  | 21 | acauacuguggagccugagc      | 0 | 33 | 33 | 4  | 5 | 7 | 5  | 28 | 4  | 1  |
| scaffold163628_1173063 | 20 | cuaaaugcauuuagcacccc      | 0 | 33 | 33 | 5  | 7 | 2 | 6  | 11 | 11 | 11 |
| C16297251_4648878      | 20 | cuaaaugcauuuagcacccc      | 0 | 33 | 33 | 5  | 7 | 2 | 6  | 11 | 11 | 11 |
| scaffold90797_659966   | 20 | cuaaaugcauuuagcacccc      | 0 | 33 | 33 | 5  | 7 | 2 | 6  | 11 | 11 | 11 |
| scaffold299530_2140295 | 24 | agaacauaugcuauuuacucuccu  | 0 | 33 | 33 | 9  | 6 | 2 | 7  | 12 | 12 | 9  |
| scaffold409649_2970531 | 24 | gaauccucuuuauagccuaacuc   | 0 | 33 | 33 | 8  | 8 | 2 | 6  | 9  | 14 | 10 |
| scaffold58169_428957   | 21 | agcaccuucgguuguugucu      | 0 | 32 | 13 | 9  | 5 | 5 | 2  | 4  | 3  | 6  |
| scaffold151184_1085817 | 24 | aaccgagaacagacacuuuacuc   | 0 | 32 | 19 | 4  | 7 | 3 | 10 | 0  | 0  | 19 |
| scaffold353905_2532648 | 24 | gcuuguuauucgguucuugagagc  | 0 | 32 | 20 | 10 | 4 | 7 | 3  | 7  | 7  | 6  |

|                        |    |                           |   |    |    |    |   |   |    |    |    |    |
|------------------------|----|---------------------------|---|----|----|----|---|---|----|----|----|----|
| scaffold455211_3493381 | 20 | cauaguaacgaggccuuua       | 0 | 32 | 25 | 6  | 4 | 4 | 6  | 10 | 7  | 8  |
| C15028968_4206818      | 24 | aaaaauaggacuacaauaugaacu  | 0 | 32 | 29 | 6  | 3 | 3 | 12 | 12 | 6  | 11 |
| C15063058_4216721      | 24 | acgccauguugggauugagcaacu  | 0 | 32 | 29 | 6  | 5 | 7 | 6  | 19 | 7  | 3  |
| scaffold235537_1684999 | 24 | aguguuuccagaauuuguacuac   | 0 | 32 | 29 | 10 | 4 | 4 | 6  | 12 | 11 | 6  |
| scaffold340967_2436690 | 24 | uucauccaaucaugaggugacacc  | 0 | 32 | 30 | 6  | 7 | 4 | 7  | 20 | 3  | 7  |
| C14159223_3975854      | 24 | uucauccaaucaugaggugacacc  | 0 | 32 | 30 | 6  | 7 | 4 | 7  | 20 | 3  | 7  |
| C15134528_4237412      | 24 | aaacaguguacucggauugggugc  | 0 | 32 | 31 | 6  | 4 | 8 | 6  | 19 | 7  | 5  |
| scaffold109845_795632  | 24 | aaacaguguacucggauugggugc  | 0 | 32 | 31 | 6  | 4 | 8 | 6  | 19 | 7  | 5  |
| C16227933_4618629      | 24 | gccuacuacaggaacugggacacc  | 0 | 32 | 31 | 3  | 8 | 6 | 7  | 16 | 9  | 6  |
| C17430400_5378598      | 19 | uuacaaaugugggcggcc        | 0 | 32 | 32 | 4  | 4 | 6 | 5  | 17 | 0  | 15 |
| C16578702_4778752      | 24 | aacccaaacggauuagaaucauu   | 0 | 32 | 32 | 5  | 5 | 4 | 10 | 5  | 3  | 24 |
| scaffold219475_1568535 | 24 | uguuccucuuaaggagacguacacu | 0 | 32 | 32 | 8  | 6 | 5 | 5  | 16 | 3  | 13 |
| scaffold244898_1751119 | 24 | guggacuguccacuugcaggcgcc  | 0 | 32 | 32 | 5  | 8 | 8 | 3  | 13 | 5  | 14 |
| scaffold390566_2811279 | 24 | uugcauccgauccaaucacaucau  | 0 | 32 | 32 | 7  | 8 | 2 | 7  | 12 | 6  | 14 |
| scaffold92759_674474   | 24 | gaaccguuagaaccguuuuuggcc  | 0 | 32 | 32 | 7  | 6 | 6 | 5  | 6  | 14 | 12 |
| scaffold438376_3250298 | 24 | cgaugaauuuucguuguugaaac   | 0 | 31 | 14 | 9  | 3 | 5 | 7  | 7  | 5  | 2  |
| scaffold452497_3442989 | 23 | aucggucgccuuugcccuggug    | 0 | 31 | 16 | 7  | 8 | 7 | 1  | 3  | 5  | 8  |
| scaffold342863_2450416 | 21 | uuuuuugaugaaauuggugg      | 0 | 31 | 23 | 11 | 0 | 6 | 4  | 5  | 12 | 6  |
| C16359907_4675782      | 22 | guuggaaucaucaugaugucg     | 0 | 31 | 24 | 6  | 4 | 6 | 6  | 8  | 4  | 12 |
| C17060032_5063974      | 24 | aguggcacauuuauagcuagagc   | 0 | 31 | 29 | 6  | 4 | 7 | 7  | 11 | 5  | 13 |
| scaffold338440_2417527 | 21 | auaucguacugaggugggacc     | 0 | 31 | 29 | 5  | 4 | 7 | 5  | 11 | 8  | 10 |
| scaffold455714_3503626 | 24 | caggccuaagugaucacucuggcc  | 0 | 31 | 30 | 5  | 8 | 6 | 5  | 2  | 0  | 28 |
| scaffold95045_690918   | 24 | auacaaccuuuuauugcauccgg   | 0 | 31 | 30 | 6  | 7 | 3 | 8  | 11 | 6  | 13 |
| scaffold2950_22935     | 22 | gucuaauuugguuguacugaau    | 0 | 31 | 30 | 10 | 2 | 5 | 5  | 15 | 6  | 9  |
| scaffold2950_22936     | 22 | gucuaauuugguuguacugaau    | 0 | 31 | 30 | 10 | 2 | 5 | 5  | 15 | 6  | 9  |
| C16772879_4881614      | 24 | uagaaauuaccaaugugacucacc  | 0 | 31 | 30 | 6  | 6 | 3 | 9  | 8  | 8  | 14 |

|                        |    |                          |   |    |    |    |    |   |    |    |    |    |
|------------------------|----|--------------------------|---|----|----|----|----|---|----|----|----|----|
| C14664118_4105336      | 22 | ucauacucgguccaaaggaacc   | 0 | 31 | 30 | 4  | 7  | 4 | 7  | 17 | 9  | 4  |
| C16961593_4995948      | 24 | uaccgguacaccagcuuuuagugc | 0 | 31 | 31 | 7  | 7  | 5 | 5  | 3  | 3  | 25 |
| C16496982_4738887      | 24 | cuccaaagcucuuucggcgagcuc | 0 | 31 | 31 | 6  | 9  | 5 | 4  | 12 | 5  | 14 |
| C15979087_4518695      | 24 | uugcauccgauccaaucacau    | 0 | 31 | 31 | 7  | 8  | 2 | 7  | 12 | 5  | 14 |
| scaffold175437_1255715 | 24 | guaugucgcgcgacaauucugacu | 0 | 31 | 31 | 7  | 6  | 6 | 5  | 17 | 5  | 9  |
| C14970012_4190495      | 20 | uaaaugcauuuagcaccuuc     | 0 | 31 | 31 | 7  | 5  | 2 | 6  | 14 | 7  | 10 |
| scaffold427803_3138771 | 24 | acggaaaucgucgcuaaaggucc  | 0 | 31 | 31 | 4  | 6  | 6 | 8  | 17 | 11 | 3  |
| scaffold307588_2196815 | 24 | cagaaggugcuaaaugcauuuagc | 0 | 31 | 31 | 6  | 4  | 6 | 8  | 9  | 14 | 8  |
| scaffold162675_1166220 | 24 | acuccguaugucucuuaaaagagc | 0 | 30 | 24 | 7  | 6  | 4 | 7  | 4  | 5  | 15 |
| scaffold43080_318975   | 24 | acuccguaugucucuuaaaagagc | 0 | 30 | 24 | 7  | 6  | 4 | 7  | 4  | 5  | 15 |
| C13325597_3766936      | 24 | acuccguaugucucuuaaaagagc | 0 | 30 | 24 | 7  | 6  | 4 | 7  | 4  | 5  | 15 |
| scaffold165_1334       | 24 | uuucgagauggaccuugagcgacc | 0 | 30 | 27 | 6  | 6  | 7 | 5  | 10 | 14 | 3  |
| scaffold117592_850113  | 23 | acaucuuauauccguuugagcuc  | 0 | 30 | 28 | 9  | 6  | 3 | 5  | 8  | 9  | 11 |
| scaffold420563_3069201 | 24 | aaccgaaauacauacacuuuacuc | 0 | 30 | 28 | 6  | 7  | 1 | 10 | 12 | 14 | 2  |
| scaffold188475_1345826 | 23 | gaggcaccacguaugagcucau   | 0 | 30 | 28 | 4  | 7  | 6 | 6  | 3  | 15 | 10 |
| scaffold1856_14645     | 25 | aagguuuguucaaacuagguauuc | 0 | 30 | 29 | 10 | 3  | 5 | 7  | 10 | 2  | 17 |
| scaffold54080_399142   | 23 | gcuccuuagucgacugauggacc  | 0 | 30 | 29 | 6  | 7  | 6 | 4  | 13 | 7  | 9  |
| C13465726_3802503      | 24 | uguagagucgccaguuuuuuuac  | 0 | 30 | 29 | 10 | 4  | 6 | 4  | 11 | 8  | 10 |
| scaffold207048_1482033 | 24 | accgguaugcuguuuuuccagacc | 0 | 30 | 29 | 8  | 7  | 5 | 4  | 10 | 10 | 9  |
| scaffold381501_2739756 | 24 | uaagagcucgccacaagccacc   | 0 | 30 | 29 | 3  | 10 | 4 | 7  | 4  | 11 | 14 |
| C15837933_4465849      | 24 | caguucgcgagauccucuuaaaac | 0 | 30 | 29 | 6  | 7  | 4 | 7  | 12 | 12 | 5  |
| scaffold452090_3437828 | 24 | ugcucgggcgcucugauuaaugcc | 0 | 30 | 30 | 7  | 7  | 7 | 3  | 14 | 5  | 11 |
| scaffold337092_2408147 | 21 | aaucuuugagauuccuccac     | 0 | 30 | 30 | 8  | 6  | 2 | 5  | 6  | 13 | 11 |
| scaffold156831_1125890 | 22 | aacucauuuaugcauccggu     | 0 | 30 | 30 | 7  | 5  | 3 | 7  | 11 | 13 | 6  |
| scaffold416197_3028651 | 24 | cagguggugcuaaaugcauuuagc | 0 | 29 | 18 | 7  | 4  | 7 | 6  | 6  | 9  | 3  |
| C17190654_5163586      | 24 | uagaaauaccaaugugacucacc  | 0 | 29 | 23 | 6  | 6  | 3 | 9  | 5  | 6  | 12 |

|                        |    |                          |   |    |    |    |    |   |   |    |    |    |
|------------------------|----|--------------------------|---|----|----|----|----|---|---|----|----|----|
| scaffold394955_2847470 | 24 | guauuuuggaaaaaacccggacc  | 0 | 29 | 25 | 5  | 5  | 5 | 9 | 6  | 7  | 12 |
| scaffold135935_979342  | 22 | ucuucaaccauugguucugugg   | 0 | 29 | 27 | 9  | 5  | 5 | 3 | 15 | 9  | 3  |
| scaffold150794_1082557 | 24 | aaaugcauuuaguaccuucugguu | 0 | 29 | 27 | 10 | 4  | 4 | 6 | 8  | 10 | 9  |
| C14227527_3993033      | 25 | aagguuuguucaaacuagguauuc | 0 | 29 | 28 | 10 | 3  | 5 | 7 | 9  | 2  | 17 |
| C17371318_5321106      | 24 | aauguugauagugccuuuagcac  | 0 | 29 | 28 | 8  | 4  | 5 | 7 | 13 | 6  | 9  |
| C15551567_4367545      | 24 | auucgauuuuggacuagcuugccc | 0 | 29 | 28 | 9  | 6  | 5 | 4 | 5  | 7  | 16 |
| C14002373_3938165      | 24 | uaaauucuucuaaacucaagcucu | 0 | 29 | 28 | 10 | 6  | 1 | 7 | 6  | 12 | 10 |
| C17123856_5111188      | 21 | aucaguucaguuagccuac      | 0 | 29 | 28 | 7  | 5  | 4 | 5 | 4  | 21 | 3  |
| scaffold314811_2248840 | 22 | uaguccaguuuguguuaaaauuc  | 0 | 29 | 29 | 10 | 3  | 4 | 5 | 0  | 0  | 29 |
| scaffold248600_1778538 | 24 | aaauccggugaguauauacgaac  | 0 | 29 | 29 | 6  | 4  | 5 | 9 | 0  | 0  | 29 |
| scaffold170144_1217616 | 24 | aaccgcucaugggcgacuugaccc | 0 | 29 | 29 | 4  | 9  | 6 | 5 | 6  | 6  | 17 |
| scaffold2197_17120     | 23 | uaaaugcauuuagcacauucugg  | 0 | 29 | 29 | 8  | 4  | 4 | 7 | 6  | 9  | 14 |
| C15906401_4491188      | 22 | aaaacguguuuugcaccugggc   | 0 | 29 | 29 | 6  | 5  | 6 | 5 | 14 | 9  | 6  |
| C15975821_4518881      | 24 | aaaugcauuuaguaccuucugguu | 0 | 29 | 29 | 10 | 4  | 4 | 6 | 9  | 10 | 10 |
| C15337061_4298756      | 24 | aaaugcauuuaguaccuucugguu | 0 | 29 | 29 | 10 | 4  | 4 | 6 | 9  | 10 | 10 |
| scaffold40721_303438   | 24 | gaaccguuagaacaauuuuuggcc | 0 | 29 | 29 | 7  | 5  | 5 | 7 | 13 | 12 | 4  |
| C17223939_5191867      | 24 | ugagaaugauuggcucaaaccauu | 0 | 28 | 17 | 7  | 4  | 5 | 8 | 6  | 3  | 8  |
| scaffold430981_3171034 | 21 | uuuuuugaugaaauuuggugg    | 0 | 28 | 20 | 11 | 0  | 6 | 4 | 5  | 11 | 4  |
| C16917043_4968166      | 24 | aaucacuuaggagacguacuug   | 0 | 28 | 23 | 8  | 4  | 5 | 7 | 14 | 3  | 6  |
| scaffold1607_12593     | 21 | uucuuucgguugagagcagcc    | 0 | 28 | 23 | 6  | 5  | 6 | 4 | 10 | 4  | 9  |
| scaffold42446_314813   | 24 | aggauuggaucagacugaaacacc | 0 | 28 | 26 | 4  | 5  | 6 | 9 | 8  | 4  | 14 |
| scaffold411429_2986613 | 21 | cacauccccagcagagucgcc    | 0 | 28 | 27 | 2  | 10 | 4 | 5 | 16 | 0  | 11 |
| scaffold174002_1244901 | 22 | ccugagaauuucuuaagucuuu   | 0 | 28 | 27 | 10 | 4  | 3 | 5 | 2  | 2  | 23 |
| C15689841_4414050      | 22 | guuuuuuacgugguaaacucuc   | 0 | 28 | 27 | 10 | 4  | 4 | 4 | 17 | 5  | 5  |
| scaffold10737_80596    | 20 | ucuccacaaauucauaa        | 0 | 28 | 27 | 6  | 7  | 0 | 7 | 15 | 7  | 5  |
| C14201553_3986300      | 22 | auucgaggguuuuaggauc      | 0 | 28 | 27 | 7  | 3  | 7 | 5 | 17 | 10 | 0  |

|                        |    |                          |   |    |    |    |    |   |    |    |    |    |
|------------------------|----|--------------------------|---|----|----|----|----|---|----|----|----|----|
| scaffold261413_1869211 | 21 | uuucaacaagaaacucaaccu    | 0 | 28 | 27 | 5  | 6  | 1 | 9  | 15 | 12 | 0  |
| C13171224_3728534      | 22 | aauuuccaggaagcuauaucuc   | 0 | 28 | 27 | 7  | 5  | 3 | 7  | 12 | 13 | 2  |
| scaffold301019_2150946 | 24 | aauguacaacuuugaugcacc    | 0 | 28 | 28 | 7  | 6  | 4 | 7  | 6  | 1  | 21 |
| scaffold94440_686776   | 22 | cggcugaagugaugucucugac   | 0 | 28 | 28 | 6  | 5  | 7 | 4  | 9  | 9  | 10 |
| C16820345_4909497      | 24 | ugaucgaucaugguccaggcacu  | 0 | 28 | 28 | 6  | 7  | 6 | 5  | 5  | 10 | 13 |
| C15465583_4339399      | 24 | gaugccccgcgauguacagaacau | 0 | 28 | 28 | 4  | 7  | 6 | 7  | 6  | 11 | 11 |
| scaffold191634_1369063 | 21 | uaucugucaaaucacuugguc    | 0 | 28 | 28 | 8  | 5  | 3 | 5  | 16 | 11 | 1  |
| scaffold456406_3518423 | 21 | uaaucgaaccguugccaacc     | 0 | 28 | 28 | 4  | 8  | 3 | 6  | 8  | 18 | 2  |
| scaffold277597_1985496 | 22 | accuuacucgguugucaaggac   | 0 | 27 | 13 | 6  | 6  | 5 | 5  | 1  | 1  | 11 |
| C15903885_4490209      | 24 | gcacacaggcuccuguacucugcc | 0 | 27 | 17 | 5  | 10 | 5 | 4  | 8  | 9  | 0  |
| C13433222_3794140      | 22 | ucuuacuggggugaagcacuuu   | 0 | 27 | 20 | 8  | 4  | 6 | 4  | 14 | 6  | 0  |
| scaffold392696_2828597 | 24 | cuccagaacuuuuucgagaugagc | 0 | 27 | 20 | 7  | 6  | 5 | 6  | 10 | 7  | 3  |
| scaffold313913_2242195 | 19 | augugaaaauccggcccg       | 0 | 27 | 21 | 3  | 6  | 5 | 5  | 6  | 9  | 6  |
| scaffold433321_3195996 | 21 | uuuuuugaugaaauuuggugg    | 0 | 27 | 23 | 11 | 0  | 6 | 4  | 5  | 12 | 6  |
| scaffold363673_2604891 | 20 | gaucgaucuuggcAUUAGUA     | 0 | 27 | 24 | 7  | 3  | 5 | 5  | 8  | 5  | 11 |
| C12891055_3659936      | 23 | ucuuuguuuucucucuaaacu    | 0 | 27 | 24 | 13 | 6  | 1 | 3  | 6  | 8  | 10 |
| scaffold194117_1387177 | 24 | agaagccaagaaccucaaaccgu  | 0 | 27 | 25 | 2  | 7  | 4 | 11 | 7  | 6  | 12 |
| scaffold302340_2160103 | 24 | ggugauacuuaacuugauacu    | 0 | 27 | 25 | 9  | 4  | 4 | 7  | 17 | 7  | 1  |
| scaffold390744_2814933 | 24 | cacggaucgggugucucagacc   | 0 | 27 | 25 | 4  | 7  | 8 | 5  | 7  | 9  | 9  |
| scaffold45603_337178   | 24 | acuugggcgacguacaaucucgu  | 0 | 27 | 25 | 6  | 6  | 6 | 6  | 4  | 12 | 9  |
| scaffold183936_1313828 | 24 | acuugggcgacguacaaucucgu  | 0 | 27 | 25 | 6  | 6  | 6 | 6  | 4  | 12 | 9  |
| C12767601_3629746      | 24 | acuugggcgacguacaaucucgu  | 0 | 27 | 25 | 6  | 6  | 6 | 6  | 4  | 12 | 9  |
| scaffold10973_81996    | 24 | ccucgcuccgaauguuuuuaaac  | 0 | 27 | 25 | 9  | 7  | 3 | 5  | 6  | 13 | 6  |
| scaffold288114_2059944 | 24 | guacagaccggccuuuuuacgac  | 0 | 27 | 25 | 6  | 7  | 6 | 5  | 8  | 13 | 4  |
| scaffold289363_2068571 | 24 | aaggacaaccuuuagagaagggu  | 0 | 27 | 26 | 4  | 3  | 7 | 10 | 0  | 2  | 24 |
| scaffold24940_186370   | 24 | aaguaaggaccacuuuuuaggac  | 0 | 27 | 26 | 5  | 4  | 5 | 10 | 14 | 3  | 9  |

|                        |    |                          |   |    |    |    |   |   |   |    |    |    |
|------------------------|----|--------------------------|---|----|----|----|---|---|---|----|----|----|
| scaffold80021_581708   | 24 | uaauugacacgacacgcuaacucg | 0 | 27 | 26 | 6  | 7 | 4 | 7 | 9  | 4  | 13 |
| scaffold10667_79673    | 23 | uaaaugcauuuagcacauucugg  | 0 | 27 | 26 | 8  | 4 | 4 | 7 | 9  | 5  | 12 |
| scaffold77751_566213   | 24 | aauguccaaucaccauauguagu  | 0 | 27 | 26 | 8  | 5 | 3 | 8 | 5  | 11 | 10 |
| C13231527_3743733      | 22 | uccaugaaggcguacaauucucu  | 0 | 27 | 26 | 6  | 6 | 4 | 6 | 5  | 21 | 0  |
| scaffold120798_872031  | 24 | caguguacggcaccagugacgaac | 0 | 27 | 27 | 3  | 7 | 7 | 7 | 18 | 6  | 3  |
| scaffold421546_3078213 | 23 | aauguacaacucaucaaagcacc  | 0 | 27 | 27 | 5  | 7 | 2 | 9 | 10 | 7  | 10 |
| C16090897_4562596      | 24 | aaccaaugguccucuuuagaucuu | 0 | 27 | 27 | 9  | 6 | 3 | 6 | 12 | 7  | 8  |
| scaffold414892_3016911 | 20 | ucuccacaaaauucauaa       | 0 | 27 | 27 | 6  | 7 | 0 | 7 | 15 | 7  | 5  |
| scaffold42774_317000   | 22 | cuggaggaagcuguccauuacu   | 0 | 27 | 27 | 6  | 5 | 6 | 5 | 18 | 7  | 2  |
| C14913518_4174421      | 24 | accgguaugcuguuuuuccagacc | 0 | 27 | 27 | 8  | 7 | 5 | 4 | 5  | 13 | 9  |
| C13191987_3733780      | 24 | ggagagcuauuuagaacuugccu  | 0 | 26 | 13 | 7  | 4 | 7 | 6 | 4  | 4  | 5  |
| scaffold399336_2883009 | 24 | uaugcugaucaguguacguccu   | 0 | 26 | 15 | 8  | 6 | 5 | 5 | 5  | 1  | 9  |
| scaffold153618_1102496 | 24 | auuuauaguacaaauaggcuug   | 0 | 26 | 20 | 9  | 2 | 5 | 8 | 8  | 2  | 10 |
| scaffold39761_295935   | 24 | aauggcuuugcagucucuuaagc  | 0 | 26 | 22 | 9  | 5 | 5 | 5 | 4  | 1  | 17 |
| scaffold8214_62361     | 24 | ucgcguacggcaccgugauuaacc | 0 | 26 | 22 | 5  | 8 | 6 | 5 | 6  | 6  | 10 |
| C12957777_3676399      | 22 | uaaaauuugagcaugauccaac   | 0 | 26 | 22 | 6  | 4 | 3 | 9 | 10 | 6  | 6  |
| scaffold396903_2863154 | 24 | ucuuuuaccaauacauggguggc  | 0 | 26 | 23 | 8  | 6 | 4 | 6 | 13 | 5  | 5  |
| scaffold449606_3396645 | 21 | uuuuuugaugaaauuggugg     | 0 | 26 | 23 | 11 | 0 | 6 | 4 | 5  | 12 | 6  |
| C12751927_3625990      | 21 | uuuuuugaugaaauuggugg     | 0 | 26 | 23 | 11 | 0 | 6 | 4 | 5  | 12 | 6  |
| scaffold454389_3477366 | 24 | auuuuuucaauccuguaguuaac  | 0 | 26 | 24 | 11 | 4 | 2 | 7 | 9  | 4  | 11 |
| scaffold329267_2352597 | 24 | aauguccaucguggguguccauc  | 0 | 26 | 24 | 7  | 7 | 6 | 4 | 6  | 9  | 9  |
| scaffold447324_3363238 | 21 | uuuuuugaugaaauuggugg     | 0 | 26 | 24 | 11 | 0 | 6 | 4 | 6  | 12 | 6  |
| C14954878_4186006      | 21 | acuaauuuugaugucucuua     | 0 | 26 | 25 | 11 | 3 | 2 | 5 | 1  | 0  | 24 |
| scaffold8953_66936     | 24 | gaguauucuagugacuaugauccu | 0 | 26 | 25 | 9  | 4 | 5 | 6 | 5  | 4  | 16 |
| C16426784_4706562      | 24 | uacggagauucgucguuaagacc  | 0 | 26 | 25 | 7  | 5 | 6 | 6 | 12 | 5  | 8  |
| scaffold16030_120920   | 22 | aggacugaccugauuuuuuuau   | 0 | 26 | 25 | 8  | 3 | 4 | 7 | 8  | 6  | 11 |



|                        |    |                           |   |    |    |    |   |   |    |    |    |    |
|------------------------|----|---------------------------|---|----|----|----|---|---|----|----|----|----|
| scaffold385965_2774263 | 24 | aaagugaucacuuaggccuggcuc  | 0 | 26 | 25 | 6  | 6 | 6 | 6  | 7  | 7  | 11 |
| scaffold190295_1358831 | 24 | acuugggcgacguacaauacuacgu | 0 | 26 | 25 | 6  | 6 | 6 | 6  | 4  | 12 | 9  |
| C16725316_4855352      | 20 | aaggauuucuuuaaacgugg      | 0 | 26 | 25 | 7  | 2 | 5 | 6  | 10 | 15 | 0  |
| scaffold42446_314814   | 24 | aggauuggaucagacugaaacacc  | 0 | 26 | 26 | 4  | 5 | 6 | 9  | 8  | 4  | 14 |
| C15028484_4206609      | 22 | ucuauauagugaguagaucacc    | 0 | 26 | 26 | 7  | 4 | 4 | 7  | 20 | 5  | 1  |
| scaffold300190_2145375 | 24 | aucggcagucgaaucgaaaacacc  | 0 | 26 | 26 | 3  | 8 | 3 | 10 | 12 | 6  | 8  |
| scaffold156263_1122005 | 24 | uuuauugcgccuauuaccuugggc  | 0 | 26 | 26 | 10 | 6 | 5 | 3  | 15 | 6  | 5  |
| scaffold282992_2023233 | 24 | agagccugauauacuauugggcc   | 0 | 25 | 18 | 7  | 5 | 6 | 6  | 8  | 6  | 4  |
| scaffold42517_315964   | 24 | gaagguacuaaaugcauuuagcac  | 0 | 25 | 19 | 6  | 4 | 5 | 9  | 8  | 5  | 6  |
| scaffold240023_1715575 | 22 | caccaaauucauaaaaaauu      | 0 | 25 | 19 | 6  | 5 | 0 | 11 | 7  | 6  | 6  |
| scaffold427544_3135919 | 21 | uuuccgguuauuuuuugau       | 0 | 25 | 19 | 12 | 2 | 4 | 3  | 2  | 14 | 3  |
| scaffold304500_2174808 | 22 | uucauucgguugagagcagcug    | 0 | 25 | 20 | 7  | 4 | 7 | 4  | 7  | 4  | 9  |
| scaffold19945_149667   | 21 | caugucgcgcgacaaacacc      | 0 | 25 | 20 | 2  | 9 | 4 | 6  | 7  | 5  | 8  |
| scaffold1240_9370      | 24 | ucccaaaaauuuggugccggacc   | 0 | 25 | 21 | 5  | 8 | 5 | 6  | 10 | 8  | 3  |
| C16614060_4797110      | 22 | uuuugcacuugguuaacaauuc    | 0 | 25 | 22 | 10 | 4 | 3 | 5  | 11 | 11 | 0  |
| scaffold48579_358561   | 24 | cauuuuaccucaacuauuugac    | 0 | 25 | 23 | 9  | 8 | 1 | 6  | 9  | 11 | 3  |
| scaffold429773_3159049 | 24 | aauguaugucuccaagugacucu   | 0 | 25 | 24 | 9  | 5 | 4 | 6  | 7  | 3  | 14 |
| scaffold227031_1623525 | 24 | auuucggguuagacacgcuaacc   | 0 | 25 | 24 | 7  | 6 | 5 | 6  | 9  | 3  | 12 |
| scaffold443695_3314571 | 24 | guucaauguauagcuucuggcacc  | 0 | 25 | 24 | 8  | 6 | 5 | 5  | 5  | 6  | 13 |
| C15534589_4361768      | 21 | aaucaaaauuguaugucgccu     | 0 | 25 | 24 | 8  | 4 | 3 | 6  | 7  | 17 | 0  |
| C14012397_3940584      | 23 | uagauuuuguuucugauaaggcac  | 0 | 25 | 25 | 9  | 3 | 5 | 6  | 21 | 4  | 0  |
| C13906895_3915282      | 23 | uagauuuuguuucugauaaggcac  | 0 | 25 | 25 | 9  | 3 | 5 | 6  | 21 | 4  | 0  |
| C16423888_4705163      | 21 | acaaaauuaguauugcgccua     | 0 | 25 | 25 | 6  | 4 | 3 | 8  | 2  | 5  | 18 |
| scaffold263113_1881676 | 23 | uaaaugcauuuagcacauucugg   | 0 | 25 | 25 | 8  | 4 | 4 | 7  | 8  | 5  | 12 |
| C13568545_3829389      | 20 | gagcucggaucgaucggua       | 0 | 25 | 25 | 4  | 4 | 7 | 5  | 13 | 7  | 5  |
| scaffold91945_677685   | 22 | caccaaauucauaaaaaauu      | 0 | 25 | 25 | 6  | 5 | 0 | 11 | 8  | 11 | 6  |

|                        |    |                          |   |    |    |    |   |    |    |    |    |    |
|------------------------|----|--------------------------|---|----|----|----|---|----|----|----|----|----|
| scaffold166911_1195592 | 24 | acgauuuugcacucuuuuugcgcc | 0 | 25 | 25 | 10 | 7 | 4  | 3  | 6  | 13 | 6  |
| scaffold261234_1867944 | 24 | gcgguguuguggcacuggcacacc | 0 | 24 | 5  | 6  | 6 | 9  | 3  | 3  | 2  | 0  |
| scaffold100919_731554  | 24 | aucagucgacugauggacucugcu | 0 | 24 | 8  | 7  | 6 | 6  | 5  | 3  | 0  | 5  |
| scaffold361501_2588497 | 23 | ccacaaaauuuuaucaaaaaauu  | 0 | 24 | 11 | 7  | 5 | 0  | 11 | 1  | 0  | 10 |
| C13161546_3726129      | 24 | auuucaaaauaucguggaaggauu | 0 | 24 | 13 | 8  | 2 | 6  | 8  | 3  | 2  | 8  |
| scaffold34487_257196   | 23 | uccacgugcaaguauggguugc   | 0 | 24 | 14 | 6  | 5 | 8  | 4  | 3  | 4  | 7  |
| scaffold323753_2312741 | 24 | ucaacuugugaucuuggcuuaac  | 0 | 24 | 15 | 10 | 5 | 4  | 5  | 6  | 6  | 3  |
| scaffold430143_3162959 | 22 | cacaaaauucaucaaaaaauu    | 0 | 24 | 16 | 6  | 5 | 0  | 11 | 4  | 4  | 8  |
| scaffold185113_1322312 | 24 | gucaccggagauucagcagugagc | 0 | 24 | 18 | 4  | 6 | 8  | 6  | 5  | 6  | 7  |
| C13622507_3843459      | 24 | uccuucggccgauacaugauguau | 0 | 24 | 18 | 8  | 6 | 5  | 5  | 2  | 8  | 8  |
| scaffold270120_1931521 | 23 | aaguguauuuacucgcucgaug   | 0 | 24 | 20 | 8  | 4 | 6  | 5  | 7  | 9  | 4  |
| C16246237_4626396      | 23 | aauaaguucuaaggcauuugaauu | 0 | 24 | 21 | 8  | 2 | 4  | 9  | 11 | 6  | 4  |
| scaffold40505_301538   | 20 | caucauuuggaugugaaucg     | 0 | 24 | 23 | 7  | 3 | 5  | 5  | 7  | 3  | 13 |
| scaffold454813_3485491 | 22 | ggcagcucgaauugggugcaac   | 0 | 24 | 23 | 4  | 5 | 8  | 5  | 3  | 4  | 16 |
| scaffold415784_3024616 | 22 | uaauguuguacauugcuuuggc   | 0 | 24 | 23 | 10 | 3 | 5  | 4  | 10 | 4  | 9  |
| scaffold251363_1797558 | 24 | uuagguaaguuaaggauuuauucc | 0 | 24 | 23 | 10 | 2 | 6  | 6  | 14 | 4  | 5  |
| scaffold72704_531874   | 23 | uaaaugcauuuagcacauucugg  | 0 | 24 | 23 | 8  | 4 | 4  | 7  | 6  | 5  | 12 |
| scaffold431771_3180061 | 24 | uucacagaauacacaguaguuac  | 0 | 24 | 23 | 6  | 5 | 3  | 10 | 18 | 5  | 0  |
| scaffold205318_1470211 | 24 | aaauguauuuagcaccuucugguu | 0 | 24 | 23 | 10 | 4 | 4  | 6  | 7  | 7  | 9  |
| C15670369_4407315      | 21 | uuuuuugaugaaauuuggugg    | 0 | 24 | 23 | 11 | 0 | 6  | 4  | 5  | 12 | 6  |
| scaffold80379_584430   | 21 | uuuuuugaugaaauuuggugg    | 0 | 24 | 23 | 11 | 0 | 6  | 4  | 5  | 12 | 6  |
| scaffold404030_2921544 | 21 | uuuuuugaugaaauuuggugg    | 0 | 24 | 23 | 11 | 0 | 6  | 4  | 5  | 12 | 6  |
| scaffold346590_2478152 | 23 | aaaaauuuaucaauacuaggac   | 0 | 24 | 24 | 6  | 3 | 2  | 12 | 15 | 0  | 9  |
| scaffold12359_92537    | 23 | aaaaauuuaucaauacuaggac   | 0 | 24 | 24 | 6  | 3 | 2  | 12 | 15 | 0  | 9  |
| scaffold36081_268285   | 24 | ugcgggucggguuugguauuggcc | 0 | 24 | 24 | 8  | 4 | 11 | 1  | 12 | 5  | 7  |
| scaffold279969_2001793 | 24 | uauuuguacgucgccuaagagcuu | 0 | 24 | 24 | 9  | 5 | 5  | 5  | 4  | 6  | 14 |

|                        |    |                          |   |    |    |    |   |   |   |    |    |    |
|------------------------|----|--------------------------|---|----|----|----|---|---|---|----|----|----|
| C16299751_4649224      | 24 | acauuuuuucgacacuuugcacc  | 0 | 24 | 24 | 10 | 7 | 2 | 5 | 6  | 8  | 10 |
| scaffold49625_366094   | 24 | gggggcucacuggcuuuggauc   | 0 | 24 | 24 | 6  | 7 | 9 | 2 | 4  | 12 | 8  |
| scaffold131758_950150  | 21 | cugccagaaaauuugcaagcc    | 0 | 23 | 13 | 5  | 6 | 4 | 6 | 4  | 9  | 0  |
| C15502841_4351355      | 23 | uaaaugcauuuagcacuuucuga  | 0 | 23 | 18 | 9  | 4 | 3 | 7 | 5  | 3  | 10 |
| C16114065_4572008      | 24 | auaucggagaucauuaguacaau  | 0 | 23 | 19 | 8  | 3 | 4 | 9 | 0  | 0  | 19 |
| scaffold455824_3505716 | 22 | uacacucggcugcucucaacug   | 0 | 23 | 21 | 6  | 8 | 4 | 4 | 5  | 4  | 12 |
| scaffold371545_2664504 | 24 | gagauaucaacauuuaguagugu  | 0 | 23 | 21 | 8  | 2 | 6 | 8 | 8  | 6  | 7  |
| scaffold355330_2542848 | 22 | ugaagugccaugaacagugauc   | 0 | 23 | 21 | 5  | 4 | 6 | 7 | 10 | 8  | 3  |
| scaffold9350_69773     | 24 | accuaauguaggauuuuggugcc  | 0 | 23 | 21 | 7  | 4 | 6 | 7 | 11 | 8  | 2  |
| scaffold100593_731194  | 24 | ucuuugucgcgcgacaaugggcc  | 0 | 23 | 21 | 7  | 7 | 7 | 3 | 8  | 9  | 4  |
| scaffold84279_613613   | 24 | accaagcuuugugauaguagagcu | 0 | 23 | 22 | 7  | 4 | 6 | 7 | 10 | 1  | 11 |
| C16420304_4703398      | 21 | uaauuucgagaaucgauucc     | 0 | 23 | 22 | 9  | 4 | 3 | 5 | 9  | 8  | 5  |
| scaffold335605_2398015 | 24 | aaccgaguaaugugucuguuacuc | 0 | 23 | 22 | 8  | 5 | 5 | 6 | 10 | 8  | 4  |
| C15329875_4296346      | 24 | uaauuauugcgaaauaaucggcc  | 0 | 23 | 22 | 8  | 4 | 4 | 8 | 5  | 10 | 7  |
| scaffold163755_1173984 | 24 | uaauuauugcgaaauaaucggcc  | 0 | 23 | 22 | 8  | 4 | 4 | 8 | 5  | 10 | 7  |
| scaffold91620_666054   | 24 | cauauuauucggugcuauaggcc  | 0 | 23 | 22 | 8  | 5 | 6 | 5 | 9  | 11 | 2  |
| scaffold64406_472432   | 24 | aucaaucucgauauguuugguccu | 0 | 23 | 22 | 10 | 5 | 4 | 5 | 9  | 11 | 2  |
| scaffold334224_2388013 | 24 | guugucaauggcuaaccuucggcg | 0 | 23 | 23 | 7  | 7 | 7 | 3 | 11 | 3  | 9  |
| scaffold387779_2788898 | 23 | uaaaugcauuuagcacauucugg  | 0 | 23 | 23 | 8  | 4 | 4 | 7 | 6  | 5  | 12 |
| C16512206_4746344      | 24 | gucaaacagggcuccucugagcuc | 0 | 23 | 23 | 5  | 8 | 6 | 5 | 14 | 5  | 4  |
| scaffold169141_1210564 | 24 | aggaaucacuaucuaauugagagc | 0 | 23 | 23 | 6  | 4 | 5 | 9 | 11 | 6  | 6  |
| scaffold22459_167157   | 22 | uggacugcaaagucauauugc    | 0 | 23 | 23 | 7  | 4 | 5 | 6 | 10 | 7  | 6  |
| scaffold133984_965391  | 22 | uggacugcaaagucauauugc    | 0 | 23 | 23 | 7  | 4 | 5 | 6 | 10 | 7  | 6  |
| scaffold74295_542369   | 22 | uggacugcaaagucauauugc    | 0 | 23 | 23 | 7  | 4 | 5 | 6 | 10 | 7  | 6  |
| scaffold9371_69976     | 21 | uuuuuugaugaaauuggugg     | 0 | 23 | 23 | 11 | 0 | 6 | 4 | 5  | 12 | 6  |
| scaffold136303_981606  | 24 | gcacggucuuagguucgauuc    | 0 | 23 | 23 | 7  | 8 | 6 | 3 | 6  | 15 | 2  |



|                        |    |                          |   |    |    |    |   |   |    |    |    |    |
|------------------------|----|--------------------------|---|----|----|----|---|---|----|----|----|----|
| C12769845_3630272      | 24 | uauuccgauucacguccuuggccc | 0 | 22 | 22 | 8  | 9 | 4 | 3  | 5  | 8  | 9  |
| scaffold259252_1853882 | 24 | aaaacagauuuagaccuugaugu  | 0 | 22 | 22 | 7  | 4 | 4 | 9  | 5  | 9  | 8  |
| scaffold281341_2011744 | 24 | acggaugaauuguuuuugaaacu  | 0 | 21 | 11 | 9  | 2 | 5 | 8  | 8  | 2  | 1  |
| scaffold65748_488845   | 24 | uuuugcaccaccugucagcaac   | 0 | 21 | 13 | 5  | 8 | 4 | 7  | 6  | 4  | 3  |
| scaffold458509_3569335 | 24 | acaaaugacgugucagaaaguc   | 0 | 21 | 16 | 4  | 5 | 6 | 9  | 10 | 6  | 0  |
| scaffold74100_540815   | 24 | uucccaaaaauuuggugccggacc | 0 | 21 | 16 | 6  | 7 | 5 | 6  | 6  | 7  | 3  |
| scaffold237021_1695345 | 24 | acucacgaccgauuucuguauau  | 0 | 21 | 17 | 8  | 6 | 3 | 7  | 1  | 2  | 14 |
| scaffold177548_1269103 | 23 | aguaaauguauuuacucaccug   | 0 | 21 | 20 | 8  | 4 | 4 | 7  | 9  | 2  | 9  |
| scaffold192973_1378984 | 20 | ucuccacaaaauucauaa       | 0 | 21 | 20 | 6  | 7 | 0 | 7  | 12 | 4  | 4  |
| scaffold63549_466412   | 19 | cuaaaugcauuagcacc        | 0 | 21 | 20 | 5  | 6 | 2 | 6  | 7  | 6  | 7  |
| scaffold389843_2805281 | 24 | aaggacaguccuuagagaagggg  | 0 | 21 | 20 | 3  | 3 | 9 | 9  | 12 | 6  | 2  |
| C17178150_5153256      | 21 | uuuuuugaugaaauuggugg     | 0 | 21 | 20 | 11 | 0 | 6 | 4  | 5  | 11 | 4  |
| C16774575_4882670      | 21 | uuuuuugaugaaauuggugg     | 0 | 21 | 20 | 11 | 0 | 6 | 4  | 5  | 11 | 4  |
| scaffold84487_614753   | 21 | uuuuuugaugaaauuggugg     | 0 | 21 | 20 | 11 | 0 | 6 | 4  | 5  | 11 | 4  |
| scaffold225036_1608547 | 23 | acaaggcuuugucagucucuuaa  | 0 | 21 | 21 | 8  | 5 | 4 | 6  | 15 | 3  | 3  |
| scaffold161830_1160383 | 23 | uaaaugcauuuagcacauucugg  | 0 | 21 | 21 | 8  | 4 | 4 | 7  | 6  | 4  | 11 |
| scaffold157266_1128802 | 24 | uuuuucgguucgugauuugcacc  | 0 | 21 | 21 | 11 | 5 | 5 | 3  | 11 | 4  | 6  |
| scaffold126027_907705  | 24 | uuuuuaauggcgaaacccgaacc  | 0 | 21 | 21 | 6  | 7 | 4 | 7  | 9  | 5  | 7  |
| scaffold80539_585618   | 23 | uaaaugcauuuagcacuuucugg  | 0 | 21 | 21 | 9  | 4 | 4 | 6  | 4  | 6  | 11 |
| scaffold111560_808092  | 18 | ggcauuucgucgagcacc       | 0 | 21 | 21 | 4  | 6 | 5 | 3  | 7  | 6  | 8  |
| scaffold457908_3552868 | 24 | guaaaaggaagagacuuagaccuu | 0 | 21 | 21 | 5  | 3 | 6 | 10 | 9  | 6  | 6  |
| C17189416_5162492      | 24 | gagugaagcacacuuguauggcuc | 0 | 21 | 21 | 6  | 5 | 7 | 6  | 10 | 9  | 2  |
| scaffold207097_1482361 | 22 | cggcuacagccccuggaggagc   | 0 | 21 | 21 | 2  | 8 | 8 | 4  | 0  | 21 | 0  |
| scaffold266618_1906461 | 24 | acguuacuucgguucuaauaggcc | 0 | 20 | 13 | 8  | 6 | 6 | 4  | 7  | 3  | 3  |
| scaffold262315_1875105 | 24 | acuaaguacucaccuaaaucaagg | 0 | 20 | 15 | 5  | 7 | 3 | 9  | 13 | 0  | 2  |
| C15915543_4494720      | 24 | auaucaauguugucuaagguaucu | 0 | 20 | 15 | 10 | 3 | 5 | 6  | 5  | 3  | 7  |

|                        |    |                          |   |    |    |    |   |   |    |    |    |    |
|------------------------|----|--------------------------|---|----|----|----|---|---|----|----|----|----|
| scaffold336042_2400709 | 24 | uaaaaaacagugaauagaaguaac | 0 | 20 | 15 | 4  | 2 | 4 | 14 | 9  | 5  | 1  |
| scaffold367795_2636794 | 24 | ugcacauacucgguucuaagggc  | 0 | 20 | 15 | 7  | 6 | 6 | 5  | 5  | 7  | 3  |
| C16474890_4728644      | 23 | cuaaaucuguuuuagcaccuuga  | 0 | 20 | 16 | 9  | 5 | 3 | 6  | 7  | 3  | 6  |
| scaffold422506_3087262 | 24 | uguaaaaucgccaguggcaguagc | 0 | 20 | 16 | 5  | 5 | 7 | 7  | 10 | 3  | 3  |
| scaffold377473_2708108 | 24 | agaaauggucacgaguguggc    | 0 | 20 | 17 | 5  | 3 | 8 | 8  | 9  | 3  | 5  |
| scaffold16019_120731   | 19 | caaucauaucagggauggu      | 0 | 20 | 18 | 5  | 3 | 5 | 6  | 13 | 3  | 2  |
| scaffold276026_1974275 | 22 | cauuuaauaucaccauguagg    | 0 | 20 | 18 | 8  | 4 | 3 | 7  | 10 | 5  | 3  |
| scaffold56917_419514   | 22 | augccuucgcuuguuauucg     | 0 | 20 | 18 | 9  | 6 | 4 | 3  | 8  | 6  | 4  |
| scaffold86546_631907   | 23 | uguaccucgagaugcaguagc    | 0 | 20 | 18 | 7  | 5 | 6 | 5  | 8  | 6  | 4  |
| scaffold425953_3120468 | 24 | uuuuucggauucggauaaauccc  | 0 | 20 | 18 | 10 | 5 | 4 | 5  | 2  | 7  | 9  |
| scaffold51416_379096   | 24 | aaucgacugaugggcucuguccau | 0 | 20 | 18 | 7  | 6 | 6 | 5  | 3  | 9  | 6  |
| C14684154_4110920      | 19 | cuaaaugcauuuagcacc       | 0 | 20 | 19 | 5  | 6 | 2 | 6  | 7  | 5  | 7  |
| C16449684_4717124      | 23 | aauaccacuuuuuuauauacc    | 0 | 20 | 19 | 10 | 5 | 0 | 8  | 4  | 6  | 9  |
| scaffold412094_2992208 | 24 | auccgaguuggcuguuuuguuagc | 0 | 20 | 19 | 10 | 4 | 7 | 3  | 8  | 9  | 2  |
| scaffold7421_55761     | 24 | guagaaacuauaccuacgucgccu | 0 | 20 | 20 | 6  | 7 | 4 | 7  | 6  | 2  | 12 |
| scaffold177549_1269139 | 23 | aguaaauguauuuacucaccug   | 0 | 20 | 20 | 8  | 4 | 4 | 7  | 9  | 2  | 9  |
| scaffold254971_1822908 | 24 | augcauugauggguguacuauuc  | 0 | 20 | 20 | 10 | 3 | 6 | 5  | 9  | 3  | 8  |
| C16747438_4867282      | 24 | aauucuggugauacgacaugaac  | 0 | 20 | 20 | 7  | 4 | 5 | 8  | 10 | 3  | 7  |
| scaffold282831_2022105 | 23 | cuuggcacuaacuaguaugacgc  | 0 | 20 | 20 | 6  | 6 | 5 | 6  | 6  | 5  | 9  |
| scaffold108481_785028  | 21 | cggccuuggguauagugggac    | 0 | 20 | 20 | 5  | 4 | 9 | 3  | 7  | 5  | 8  |
| scaffold19725_147939   | 19 | cuaaaugcauuuagcacc       | 0 | 20 | 20 | 5  | 6 | 2 | 6  | 8  | 5  | 7  |
| C16210093_4611115      | 24 | aaggauaucaggugcagccuuuuc | 0 | 20 | 20 | 7  | 5 | 6 | 6  | 13 | 5  | 2  |
| scaffold454373_3477807 | 24 | ugccuuacucgcuugucauugagc | 0 | 20 | 20 | 9  | 7 | 5 | 3  | 5  | 9  | 6  |
| scaffold362048_2592680 | 24 | ugccuuacucgcuugucauugagc | 0 | 20 | 20 | 9  | 7 | 5 | 3  | 5  | 9  | 6  |
| scaffold111997_810981  | 21 | uuuuuugaugaaauuggugg     | 0 | 20 | 20 | 11 | 0 | 6 | 4  | 5  | 11 | 4  |
| scaffold74386_542866   | 24 | auagcaugaguaacaucucacc   | 0 | 19 | 8  | 6  | 7 | 3 | 8  | 6  | 0  | 2  |

|                        |    |                          |   |    |    |    |   |   |    |    |    |    |
|------------------------|----|--------------------------|---|----|----|----|---|---|----|----|----|----|
| scaffold294932_2107764 | 24 | uuuuuacuguucauaguu       | 0 | 19 | 10 | 13 | 2 | 4 | 5  | 6  | 3  | 1  |
| C16993925_5017466      | 24 | acuuauacuuggcucuaaaaauc  | 0 | 19 | 10 | 9  | 5 | 2 | 8  | 1  | 6  | 3  |
| C17202669_5173373      | 24 | aaaauuacuuggucuucaaac    | 0 | 19 | 11 | 9  | 5 | 2 | 8  | 6  | 4  | 1  |
| scaffold29116_218096   | 24 | aucagucgacugauggucuccu   | 0 | 19 | 12 | 7  | 8 | 5 | 4  | 4  | 1  | 7  |
| scaffold4369_32948     | 24 | auuccacuuaguuccuuaggacug | 0 | 19 | 14 | 9  | 6 | 4 | 5  | 0  | 1  | 13 |
| scaffold160848_1153232 | 24 | uaaccaaugugcugaugcuacauc | 0 | 19 | 15 | 7  | 6 | 4 | 7  | 8  | 1  | 6  |
| scaffold281223_2011078 | 24 | aaacugagauaccauuuuacau   | 0 | 19 | 16 | 5  | 4 | 3 | 12 | 5  | 2  | 9  |
| scaffold373880_2681167 | 23 | auaugggauagaacaaaauc     | 0 | 19 | 16 | 5  | 2 | 5 | 11 | 8  | 4  | 4  |
| scaffold187635_1340309 | 24 | agaaauggucacugagugggc    | 0 | 19 | 17 | 5  | 3 | 8 | 8  | 9  | 3  | 5  |
| scaffold311523_2224312 | 24 | aaacuuggagacuuuggcgcc    | 0 | 19 | 17 | 6  | 6 | 6 | 6  | 5  | 4  | 8  |
| scaffold311801_2226293 | 24 | aaacuuggagacuuuggcgcc    | 0 | 19 | 17 | 6  | 6 | 6 | 6  | 5  | 4  | 8  |
| scaffold2378_18194     | 24 | uacgguacugauccaaucaccc   | 0 | 19 | 17 | 6  | 8 | 4 | 6  | 9  | 6  | 2  |
| scaffold266242_1903583 | 24 | augucagcaugguguaauaugc   | 0 | 19 | 17 | 7  | 4 | 7 | 6  | 2  | 11 | 4  |
| C16506540_4743388      | 24 | cuuuguuagucgccuaagagaccu | 0 | 19 | 18 | 8  | 6 | 5 | 5  | 10 | 2  | 6  |
| scaffold20306_152477   | 24 | aucuauaucuuuuaacuuac     | 0 | 19 | 18 | 11 | 5 | 1 | 7  | 6  | 4  | 8  |
| scaffold430646_3167703 | 24 | gcaaaagucguuuugcaccuggac | 0 | 19 | 18 | 6  | 6 | 6 | 6  | 11 | 4  | 3  |
| scaffold185691_1326163 | 24 | aucgaaauuggaauugaauccu   | 0 | 19 | 18 | 7  | 3 | 5 | 9  | 6  | 5  | 7  |
| scaffold299517_2140087 | 24 | accuuuuuaguagacuuugccu   | 0 | 19 | 18 | 8  | 6 | 3 | 7  | 5  | 6  | 7  |
| C14154659_3974631      | 24 | cccagaaucuaaggauccguc    | 0 | 19 | 18 | 4  | 9 | 5 | 6  | 5  | 6  | 7  |
| scaffold109729_794902  | 19 | gagauaugagcucuuuag       | 0 | 19 | 18 | 5  | 2 | 5 | 7  | 11 | 6  | 1  |
| scaffold411280_2985111 | 24 | uuuaagacguuucgagcucugcc  | 0 | 19 | 18 | 8  | 7 | 5 | 4  | 5  | 9  | 4  |
| scaffold230050_1645883 | 24 | uaauuucauuuuuaguuaacu    | 0 | 19 | 19 | 13 | 2 | 2 | 7  | 17 | 0  | 2  |
| scaffold456718_3525651 | 24 | aaauuuaggagcacaucuaagu   | 0 | 19 | 19 | 7  | 4 | 5 | 8  | 1  | 2  | 16 |
| scaffold96783_703071   | 24 | agaugcauugauagguuacuu    | 0 | 19 | 19 | 9  | 2 | 6 | 7  | 7  | 2  | 10 |
| C16930737_4976630      | 24 | gauuuucuaaucgcuauaggcacu | 0 | 19 | 19 | 10 | 5 | 4 | 5  | 5  | 3  | 11 |
| scaffold441742_3289926 | 24 | aaaguacaacuuuuuuuacacc   | 0 | 19 | 19 | 6  | 6 | 1 | 11 | 11 | 3  | 5  |

|                        |    |                          |   |    |    |    |   |   |    |    |    |    |
|------------------------|----|--------------------------|---|----|----|----|---|---|----|----|----|----|
| C14684154_4110919      | 19 | cuaaaugcauuuagcaccc      | 0 | 19 | 19 | 5  | 6 | 2 | 6  | 7  | 5  | 7  |
| scaffold10667_79674    | 19 | cuaaaugcauuuagcaccc      | 0 | 19 | 19 | 5  | 6 | 2 | 6  | 7  | 5  | 7  |
| scaffold45223_334541   | 24 | auccggcggaauuuuauucucac  | 0 | 19 | 19 | 8  | 6 | 5 | 5  | 12 | 5  | 2  |
| scaffold164944_1181583 | 22 | aaaugauucaagaacaaccu     | 0 | 19 | 19 | 4  | 4 | 2 | 12 | 14 | 5  | 0  |
| scaffold349021_2495746 | 24 | uuuuucggucggcauucgugucc  | 0 | 19 | 19 | 10 | 7 | 6 | 1  | 11 | 6  | 2  |
| scaffold157667_1131553 | 23 | acuaaaggcccaucagucgacug  | 0 | 19 | 19 | 4  | 7 | 5 | 7  | 6  | 7  | 6  |
| scaffold12877_97021    | 21 | uccuaagggcacauguuacgc    | 0 | 19 | 19 | 5  | 6 | 5 | 5  | 6  | 7  | 6  |
| scaffold379989_2728140 | 24 | auacagguaaaaccgaacacaacc | 0 | 19 | 19 | 2  | 7 | 3 | 12 | 10 | 7  | 2  |
| scaffold410039_2973940 | 24 | cauccggacaggauaaaaauucc  | 0 | 19 | 19 | 4  | 6 | 4 | 10 | 6  | 11 | 2  |
| C16880143_4945554      | 24 | uucuauguacugaguaaaugauc  | 0 | 18 | 8  | 10 | 3 | 4 | 7  | 4  | 3  | 1  |
| scaffold180780_1294244 | 23 | auuaauacugguuuuuuuauucc  | 0 | 18 | 8  | 10 | 3 | 2 | 8  | 3  | 4  | 1  |
| scaffold371371_2663151 | 24 | uugucuggccaacacgugaugugu | 0 | 18 | 10 | 8  | 5 | 7 | 4  | 0  | 0  | 10 |
| scaffold106656_772554  | 24 | acgcgucgacugucuagaccagc  | 0 | 18 | 10 | 4  | 8 | 7 | 5  | 1  | 4  | 5  |
| C14089231_3958792      | 24 | ggccaagaagguuucacgcaac   | 0 | 18 | 11 | 3  | 7 | 6 | 8  | 5  | 0  | 6  |
| C15434819_4329435      | 22 | caaagguauuuuaguuggggau   | 0 | 18 | 11 | 7  | 1 | 7 | 7  | 6  | 5  | 0  |
| scaffold448767_3384234 | 24 | ucauuacuuguauggccugagcgc | 0 | 18 | 13 | 8  | 6 | 6 | 4  | 5  | 4  | 4  |
| scaffold422818_3090220 | 24 | accuuuggacaauacacuauguau | 0 | 18 | 13 | 8  | 5 | 3 | 8  | 6  | 6  | 1  |
| scaffold339365_2424698 | 22 | aacuaauaucuacgucgccuaag  | 0 | 18 | 14 | 6  | 6 | 3 | 7  | 7  | 2  | 5  |
| scaffold314779_2248593 | 21 | uuuaauuuucuccaauaucuc    | 0 | 18 | 14 | 11 | 5 | 0 | 5  | 11 | 2  | 1  |
| scaffold388507_2794655 | 21 | uuuaauuuucuccaauaucuc    | 0 | 18 | 14 | 11 | 5 | 0 | 5  | 11 | 2  | 1  |
| scaffold358613_2566931 | 22 | accacucgauucuuagaacug    | 0 | 18 | 14 | 6  | 6 | 3 | 7  | 5  | 4  | 5  |
| scaffold372029_2668217 | 24 | uugaugagcuuugcucagucgacu | 0 | 18 | 15 | 9  | 5 | 6 | 4  | 4  | 1  | 10 |
| C13295307_3759490      | 24 | ucggauauagucucaguaguagc  | 0 | 18 | 15 | 7  | 4 | 7 | 6  | 13 | 1  | 1  |
| scaffold13403_100958   | 21 | cagacacacucaccccaugug    | 0 | 18 | 15 | 3  | 9 | 3 | 6  | 7  | 2  | 6  |
| scaffold97937_710825   | 18 | ccucuuggaucccggggc       | 0 | 18 | 16 | 4  | 7 | 6 | 1  | 14 | 1  | 1  |
| C16657566_4819421      | 24 | cacaucaccuaauguggggugag  | 0 | 18 | 16 | 6  | 5 | 7 | 6  | 3  | 10 | 3  |



|                        |    |                          |   |    |    |    |   |    |    |    |    |    |
|------------------------|----|--------------------------|---|----|----|----|---|----|----|----|----|----|
| C13623311_3843714      | 24 | uaugaagucauacgaauaaccac  | 0 | 18 | 17 | 5  | 5 | 4  | 10 | 10 | 2  | 5  |
| C16631130_4805763      | 24 | aaauccaguuaaacaugauagaac | 0 | 18 | 17 | 5  | 4 | 3  | 12 | 13 | 2  | 2  |
| scaffold349180_2497282 | 24 | agaaauggucacgaguguggc    | 0 | 18 | 17 | 5  | 3 | 8  | 8  | 9  | 3  | 5  |
| C14940896_4181940      | 24 | uucgaacugaguugguugacgacu | 0 | 18 | 17 | 8  | 4 | 7  | 5  | 7  | 4  | 6  |
| C13432594_3793955      | 24 | gcacccggauaccaggagaaaac  | 0 | 18 | 17 | 1  | 8 | 6  | 9  | 2  | 6  | 9  |
| scaffold8288_62245     | 24 | auaaauccauccagugcggaac   | 0 | 18 | 17 | 4  | 6 | 5  | 9  | 8  | 6  | 3  |
| scaffold457180_3535786 | 24 | uaacuuaggcgacguacauugauc | 0 | 18 | 17 | 7  | 5 | 5  | 7  | 6  | 7  | 4  |
| scaffold350915_2510289 | 23 | aaugcgggauaugauugcacucg  | 0 | 18 | 18 | 6  | 4 | 7  | 6  | 4  | 1  | 13 |
| scaffold410421_2977277 | 24 | ugagugaucacuuaggccuggcuc | 0 | 18 | 18 | 7  | 6 | 7  | 4  | 15 | 2  | 1  |
| scaffold211889_1516996 | 24 | gccuccgaaaccagcacuugaac  | 0 | 18 | 18 | 4  | 9 | 4  | 7  | 5  | 4  | 9  |
| C14180601_3981090      | 24 | acuauuuaccucuccaugugagc  | 0 | 18 | 18 | 8  | 8 | 3  | 5  | 9  | 4  | 5  |
| scaffold134181_966741  | 24 | uccucugcucacacuuugucuuug | 0 | 18 | 18 | 11 | 8 | 3  | 2  | 4  | 5  | 9  |
| scaffold411071_2984332 | 21 | caugucgcgcgacaaacacc     | 0 | 18 | 18 | 2  | 9 | 4  | 6  | 4  | 6  | 8  |
| scaffold213296_1530606 | 23 | uaaaugcauuuagcacuuucugg  | 0 | 18 | 18 | 9  | 4 | 4  | 6  | 4  | 6  | 8  |
| scaffold295785_2113148 | 24 | acuuuauaggagucuaagauacc  | 0 | 18 | 18 | 7  | 5 | 6  | 6  | 9  | 6  | 3  |
| scaffold325564_2325878 | 24 | cucggaagaauccuaggucgccu  | 0 | 18 | 18 | 5  | 8 | 6  | 5  | 5  | 7  | 6  |
| scaffold427986_3140365 | 22 | guggcagugacguggcgugac    | 0 | 18 | 18 | 4  | 5 | 10 | 3  | 4  | 10 | 4  |
| scaffold35174_262149   | 24 | cucgagcugcaaaaggccuggcc  | 0 | 18 | 18 | 3  | 9 | 7  | 5  | 5  | 10 | 3  |
| scaffold59354_436921   | 24 | uuuuuaccguaaaaacgccaacc  | 0 | 18 | 18 | 7  | 7 | 2  | 8  | 3  | 11 | 4  |
| scaffold170444_1219599 | 24 | cuucuagcguuuuuuuuuuggccu | 0 | 17 | 7  | 11 | 5 | 4  | 4  | 2  | 1  | 4  |
| scaffold270213_1932370 | 23 | cugcaugaaaccuuucugggcc   | 0 | 17 | 7  | 7  | 7 | 5  | 4  | 4  | 2  | 1  |
| C14609212_4090821      | 24 | acuucgaauuccaaggguuuccuu | 0 | 17 | 10 | 9  | 6 | 4  | 5  | 0  | 2  | 8  |
| scaffold372222_2669225 | 23 | gguaucggccgauacuuugaacc  | 0 | 17 | 13 | 6  | 6 | 6  | 5  | 4  | 3  | 6  |
| C15699945_4417347      | 23 | aucgagugagauaugccuuugug  | 0 | 17 | 14 | 8  | 2 | 8  | 5  | 5  | 2  | 7  |
| C17348879_5301362      | 24 | ggggaccguuagaaccuuuuuac  | 0 | 17 | 14 | 4  | 5 | 6  | 9  | 5  | 3  | 6  |
| C14039983_3947112      | 24 | uccuuuuggaguuguccuauagac | 0 | 17 | 15 | 10 | 5 | 6  | 3  | 8  | 2  | 5  |

|                        |    |                          |   |    |    |    |    |    |    |    |    |    |
|------------------------|----|--------------------------|---|----|----|----|----|----|----|----|----|----|
| scaffold305447_2181320 | 24 | ccggauaggauaaaacaaucccac | 0 | 17 | 15 | 3  | 7  | 4  | 10 | 4  | 6  | 5  |
| scaffold201348_1439969 | 24 | uuuugcuggcgcuuucugacgcu  | 0 | 17 | 15 | 10 | 6  | 7  | 1  | 8  | 7  | 0  |
| scaffold47697_352136   | 21 | caauuuuauuuucaaggcuc     | 0 | 17 | 15 | 8  | 4  | 3  | 6  | 6  | 9  | 0  |
| C12719181_3618142      | 20 | caaaguucauuugcagucc      | 0 | 17 | 16 | 6  | 5  | 3  | 6  | 6  | 2  | 8  |
| scaffold7694_57772     | 21 | uacgucgccuaaggucuaaagu   | 0 | 17 | 16 | 5  | 5  | 5  | 6  | 12 | 3  | 1  |
| scaffold112363_813550  | 24 | ccuggaacgugcuacuugugucac | 0 | 17 | 16 | 7  | 7  | 6  | 4  | 5  | 6  | 5  |
| scaffold180255_1287727 | 24 | aagucuuaggcgacauacaucugc | 0 | 17 | 16 | 6  | 6  | 5  | 7  | 2  | 8  | 6  |
| scaffold199133_1423489 | 24 | gcgcuccgggacagcucuaguugc | 0 | 17 | 16 | 5  | 8  | 8  | 3  | 6  | 8  | 2  |
| C16443850_4714611      | 22 | uguagacaccccgauucgugac   | 0 | 17 | 16 | 5  | 7  | 5  | 5  | 6  | 8  | 2  |
| C13387128_3782388      | 24 | acguaaguaucaacuacgucgcc  | 0 | 17 | 16 | 6  | 7  | 4  | 7  | 6  | 10 | 0  |
| C14993708_4196784      | 21 | cucucagaggacgaaagcugg    | 0 | 17 | 17 | 3  | 5  | 7  | 6  | 2  | 0  | 15 |
| scaffold435143_3215065 | 24 | auagaaauucccauugacaugg   | 0 | 17 | 17 | 6  | 5  | 4  | 9  | 5  | 4  | 8  |
| scaffold388578_2795176 | 24 | aguacgggaauccuuuuuguaac  | 0 | 17 | 17 | 8  | 5  | 5  | 6  | 9  | 4  | 4  |
| C15119996_4233265      | 24 | gccgguuccaggcacuaccgaac  | 0 | 17 | 17 | 3  | 10 | 6  | 5  | 2  | 5  | 10 |
| scaffold366212_2624492 | 24 | aagagaagacggcauuacugauc  | 0 | 17 | 17 | 4  | 4  | 7  | 9  | 6  | 5  | 6  |
| scaffold59394_437348   | 24 | gaauguacaacuccuuauaucacc | 0 | 17 | 17 | 6  | 7  | 3  | 8  | 6  | 5  | 6  |
| scaffold126839_914193  | 23 | aacgccgaggauucaaguggagc  | 0 | 17 | 17 | 3  | 5  | 8  | 7  | 7  | 7  | 3  |
| scaffold278508_1991632 | 24 | ugaugugucagaaagugcauuggu | 0 | 17 | 17 | 8  | 2  | 8  | 6  | 8  | 7  | 2  |
| scaffold78651_572088   | 24 | ucccaucaguugggcccuaggcac | 0 | 17 | 17 | 5  | 9  | 6  | 4  | 1  | 11 | 5  |
| scaffold168887_1208800 | 24 | auggagugaguacuaguauauagc | 0 | 16 | 5  | 7  | 2  | 7  | 8  | 3  | 1  | 1  |
| scaffold168887_1208785 | 24 | auggagugaguacuaguauauagc | 0 | 16 | 5  | 7  | 2  | 7  | 8  | 3  | 1  | 1  |
| scaffold51193_377500   | 24 | uuuucgucgcuaaaaauauauccc | 0 | 16 | 7  | 9  | 6  | 2  | 7  | 4  | 3  | 0  |
| C15877267_4480325      | 19 | aaaaaugagucgguaucag      | 0 | 16 | 8  | 4  | 2  | 5  | 8  | 4  | 0  | 4  |
| scaffold242855_1736278 | 24 | ggaguguccgacaaguguugggcc | 0 | 16 | 9  | 5  | 5  | 10 | 4  | 1  | 6  | 2  |
| scaffold82120_596862   | 24 | uuuugcaccaucagucgacagagc | 0 | 16 | 10 | 6  | 7  | 5  | 6  | 2  | 6  | 2  |
| scaffold366017_2622879 | 21 | aucgcuaaagcugggccacuua   | 0 | 16 | 10 | 6  | 6  | 4  | 5  | 2  | 8  | 0  |

|                        |    |                          |   |    |    |    |    |   |    |    |   |    |
|------------------------|----|--------------------------|---|----|----|----|----|---|----|----|---|----|
| scaffold276072_1974841 | 23 | ccacaaaauuuaucaaaaaauu   | 0 | 16 | 12 | 7  | 5  | 0 | 11 | 1  | 0 | 11 |
| C14222629_3991830      | 24 | cuuggacagaauuuucugggauc  | 0 | 16 | 12 | 8  | 4  | 7 | 5  | 9  | 1 | 2  |
| C14708648_4117456      | 23 | cagaagguggaagaguuaacaagc | 0 | 16 | 13 | 3  | 3  | 8 | 9  | 7  | 5 | 1  |
| scaffold219297_1567276 | 24 | guuccuaacaugguuuagagcuu  | 0 | 16 | 13 | 9  | 4  | 5 | 6  | 4  | 6 | 3  |
| scaffold111278_805963  | 18 | uuagcaccuuugugaac        | 0 | 16 | 14 | 5  | 4  | 3 | 6  | 13 | 1 | 0  |
| scaffold171903_1230090 | 24 | acguagucaauagaauacgucgcc | 0 | 16 | 14 | 5  | 6  | 5 | 8  | 8  | 2 | 4  |
| scaffold100951_731626  | 24 | ccggaugggauagaacaucucac  | 0 | 16 | 14 | 4  | 6  | 6 | 8  | 5  | 6 | 3  |
| scaffold29120_218089   | 24 | ugggugaguaaggcuccugaucac | 0 | 16 | 15 | 6  | 5  | 8 | 5  | 5  | 3 | 7  |
| scaffold376382_2699870 | 24 | acucuaggagacguacauugguc  | 0 | 16 | 15 | 7  | 5  | 6 | 6  | 4  | 5 | 6  |
| scaffold31333_234236   | 23 | uaauuacuuuaguaccaccuga   | 0 | 16 | 15 | 7  | 5  | 2 | 9  | 4  | 6 | 5  |
| C15168616_4247172      | 24 | auugacuuauacaggcuuuggcau | 0 | 16 | 15 | 9  | 4  | 5 | 6  | 3  | 8 | 4  |
| C14599804_4088219      | 24 | accuccagcguguucucuggcacc | 0 | 16 | 16 | 6  | 10 | 5 | 3  | 0  | 0 | 16 |
| scaffold356443_2551300 | 24 | ugugcauuauaugguuguacacu  | 0 | 16 | 16 | 10 | 3  | 6 | 5  | 11 | 1 | 4  |
| C17015785_5032273      | 24 | accgaucgguauuguaccuuacc  | 0 | 16 | 16 | 7  | 7  | 4 | 6  | 9  | 2 | 5  |
| scaffold272569_1949878 | 23 | agauacuguagauauugugaggc  | 0 | 16 | 16 | 7  | 2  | 7 | 7  | 10 | 2 | 4  |
| scaffold454927_3488136 | 23 | uaaauacauuuagcaccuucugg  | 0 | 16 | 16 | 8  | 5  | 3 | 7  | 6  | 4 | 6  |
| scaffold329860_2356894 | 24 | aaauguaaacuuuugaucaccc   | 0 | 16 | 16 | 7  | 5  | 3 | 9  | 7  | 4 | 5  |
| scaffold432005_3182288 | 20 | uaaaugcauuuaguaccuuc     | 0 | 16 | 16 | 8  | 4  | 2 | 6  | 4  | 5 | 7  |
| scaffold224451_1604474 | 22 | aaccctaaauucgaucugucgg   | 0 | 16 | 16 | 5  | 6  | 5 | 6  | 6  | 6 | 4  |
| scaffold391875_2821633 | 24 | uuaguauuuacugacuuggcgcc  | 0 | 16 | 16 | 10 | 5  | 5 | 4  | 3  | 7 | 6  |
| scaffold341585_2441587 | 24 | ggacuauguacgucgccuaaaccc | 0 | 16 | 16 | 5  | 8  | 5 | 6  | 8  | 7 | 1  |
| C16208829_4610761      | 24 | ggacuauguacgucgccuaaaccc | 0 | 16 | 16 | 5  | 8  | 5 | 6  | 8  | 7 | 1  |
| scaffold409296_2967730 | 24 | ucccucguguaacuuugggacc   | 0 | 16 | 16 | 8  | 8  | 5 | 3  | 7  | 8 | 1  |
| scaffold442084_3294445 | 24 | uaaaaguuugaaaugccuugcuu  | 0 | 16 | 16 | 10 | 3  | 4 | 7  | 4  | 9 | 3  |
| scaffold386574_2778976 | 24 | gaguuuuaggagacguacauugac | 0 | 15 | 6  | 7  | 3  | 7 | 7  | 5  | 1 | 0  |
| scaffold191659_1369247 | 24 | uuucuuggucgcagguauuauauc | 0 | 15 | 9  | 11 | 4  | 5 | 4  | 5  | 3 | 1  |

|                        |    |                           |   |    |    |    |   |    |   |    |   |    |
|------------------------|----|---------------------------|---|----|----|----|---|----|---|----|---|----|
| C16625340_4802972      | 24 | uaagcgacuaacaaugcuuguc    | 0 | 15 | 10 | 8  | 5 | 4  | 7 | 8  | 2 | 0  |
| scaffold322200_2302024 | 24 | uacacauacucgaucuuagagc    | 0 | 15 | 10 | 6  | 7 | 3  | 8 | 4  | 3 | 3  |
| C17431376_5380280      | 24 | aaagcaguaauuuuugucagggc   | 0 | 15 | 11 | 8  | 3 | 6  | 7 | 0  | 0 | 11 |
| scaffold69663_509281   | 23 | cuaacuuggaccgguccggcacu   | 0 | 15 | 11 | 5  | 8 | 6  | 4 | 4  | 3 | 4  |
| C17358938_5310504      | 24 | uugagaaccgaaauaaguuuuuu   | 0 | 15 | 11 | 9  | 2 | 4  | 9 | 4  | 4 | 3  |
| scaffold122303_882020  | 24 | auucgaaaccguaaccgaaccgcc  | 0 | 15 | 12 | 3  | 9 | 4  | 8 | 3  | 5 | 4  |
| scaffold451398_3427735 | 23 | aagacucuguguuugagaaagcu   | 0 | 15 | 13 | 7  | 3 | 6  | 7 | 0  | 0 | 13 |
| scaffold138731_998214  | 24 | cuuaggcgauguagaacuaauacc  | 0 | 15 | 13 | 6  | 5 | 5  | 8 | 11 | 2 | 0  |
| scaffold351625_2515978 | 24 | uugcaugggcuaaguuuugcacc   | 0 | 15 | 13 | 8  | 6 | 6  | 4 | 5  | 3 | 5  |
| C15657353_4402958      | 21 | uuuuuugaugaaauuuuggg      | 0 | 15 | 13 | 12 | 0 | 5  | 4 | 6  | 4 | 3  |
| scaffold306038_2185526 | 24 | gauuuucuaauaucgcuauggcacu | 0 | 15 | 14 | 10 | 5 | 4  | 5 | 3  | 2 | 9  |
| C16889335_4950961      | 24 | gauuuucuaauaucgcuauggcacu | 0 | 15 | 14 | 10 | 5 | 4  | 5 | 3  | 2 | 9  |
| scaffold277688_1986105 | 24 | aaguuuuauucugaauuugggaac  | 0 | 15 | 14 | 10 | 2 | 5  | 7 | 9  | 2 | 3  |
| C17101846_5094833      | 24 | aaccuagaucuagagaugugacc   | 0 | 15 | 14 | 5  | 6 | 5  | 8 | 4  | 9 | 1  |
| scaffold175258_1253627 | 24 | aucugaucguguucauggcauuuc  | 0 | 15 | 15 | 10 | 5 | 5  | 4 | 1  | 0 | 14 |
| scaffold43338_320668   | 24 | cuuccaguaugcuguagaagcgcc  | 0 | 15 | 15 | 6  | 7 | 6  | 5 | 10 | 2 | 3  |
| scaffold16349_123465   | 24 | aguaaaauugagggcuuggccc    | 0 | 15 | 15 | 6  | 4 | 8  | 6 | 11 | 2 | 2  |
| scaffold95293_692599   | 24 | gaucgaucuugggagcucucagcc  | 0 | 15 | 15 | 6  | 7 | 7  | 4 | 2  | 3 | 10 |
| scaffold348231_2490016 | 24 | gaucgaucuugggagcucucagcc  | 0 | 15 | 15 | 6  | 7 | 7  | 4 | 2  | 3 | 10 |
| scaffold315561_2254126 | 24 | uaagacuuggaguguuacuaacc   | 0 | 15 | 15 | 7  | 5 | 5  | 7 | 5  | 3 | 7  |
| scaffold82390_598736   | 22 | uggcugggauucgcgcaggggc    | 0 | 15 | 15 | 4  | 5 | 11 | 2 | 6  | 4 | 5  |
| scaffold406775_2945132 | 22 | uuuuguggaugcauuuagaac     | 0 | 15 | 15 | 9  | 2 | 5  | 6 | 9  | 4 | 2  |
| scaffold295203_2108816 | 21 | uugauggguuguacauucug      | 0 | 15 | 15 | 9  | 3 | 6  | 3 | 10 | 5 | 0  |
| C16680574_4831114      | 24 | guccgcacgauaguccucugac    | 0 | 15 | 15 | 6  | 8 | 6  | 4 | 4  | 7 | 4  |
| scaffold376859_2703012 | 23 | aauguacaacucauuauugcacc   | 0 | 15 | 15 | 7  | 6 | 2  | 8 | 6  | 7 | 2  |
| scaffold270282_1936220 | 22 | aguugcucuaugucuggcgcc     | 0 | 14 | 2  | 7  | 6 | 7  | 2 | 0  | 0 | 2  |

|                        |    |                           |   |    |    |    |    |   |    |    |   |    |
|------------------------|----|---------------------------|---|----|----|----|----|---|----|----|---|----|
| C13747643_3876711      | 20 | caucagucgacugauggucu      | 0 | 14 | 4  | 6  | 5  | 5 | 4  | 1  | 3 | 0  |
| scaffold198416_1418027 | 24 | auccuaggcaacguaggauuacc   | 0 | 14 | 10 | 5  | 6  | 5 | 8  | 9  | 1 | 0  |
| C17417044_5362628      | 24 | cucuucgcauaaaaaucuuugcuc  | 0 | 14 | 10 | 8  | 7  | 3 | 6  | 4  | 2 | 4  |
| C16303515_4650964      | 23 | aaaugcuuggaaucacauuggga   | 0 | 14 | 11 | 5  | 3  | 6 | 9  | 7  | 1 | 3  |
| scaffold262265_1874742 | 23 | ccaccaauuuuuaucaaaaauu    | 0 | 14 | 12 | 7  | 5  | 0 | 11 | 1  | 0 | 11 |
| C16497996_4739322      | 22 | uucacgaaacugcauugcaaug    | 0 | 14 | 12 | 6  | 5  | 4 | 7  | 1  | 1 | 10 |
| scaffold263752_1886255 | 24 | aaccaguugcgaauaugagacac   | 0 | 14 | 12 | 5  | 5  | 5 | 9  | 8  | 1 | 3  |
| scaffold435854_3222333 | 24 | aaauuacacugaagaauuacaagc  | 0 | 14 | 12 | 5  | 4  | 3 | 12 | 9  | 2 | 1  |
| C16925109_4973190      | 24 | aguuuuaggagacguacaauaug   | 0 | 14 | 12 | 7  | 2  | 6 | 9  | 2  | 5 | 5  |
| scaffold153515_1101884 | 24 | auucgaaaccguaaccgaaccgcc  | 0 | 14 | 12 | 3  | 9  | 4 | 8  | 3  | 5 | 4  |
| scaffold317980_2271895 | 22 | gcauuuugugaucuuccgguuc    | 0 | 14 | 12 | 10 | 5  | 5 | 2  | 4  | 5 | 3  |
| C16058163_4549638      | 24 | auguaagaauccggguccacucce  | 0 | 14 | 12 | 5  | 8  | 5 | 6  | 5  | 5 | 2  |
| C13326633_3767208      | 23 | uaaaugcauuuagcaccuucugg   | 0 | 14 | 13 | 7  | 5  | 4 | 7  | 7  | 0 | 6  |
| scaffold236649_1692564 | 24 | agagcaauucugaucuacauuuau  | 0 | 14 | 13 | 8  | 4  | 3 | 9  | 7  | 1 | 5  |
| scaffold110300_798636  | 24 | uggauuaauuagugacuuggccc   | 0 | 14 | 13 | 8  | 4  | 6 | 6  | 8  | 2 | 3  |
| scaffold352227_2520907 | 24 | aggauuguaaaucacgugauacce  | 0 | 14 | 13 | 6  | 5  | 5 | 8  | 11 | 2 | 0  |
| scaffold212893_1523544 | 24 | aauuucgggucagacacguuuuac  | 0 | 14 | 13 | 7  | 5  | 5 | 7  | 2  | 3 | 8  |
| scaffold189449_1352504 | 24 | agcggacaauaucuugcuagguc   | 0 | 14 | 13 | 6  | 5  | 7 | 6  | 7  | 5 | 1  |
| scaffold394282_2886471 | 23 | ccaccaauuuuuaucaaaaauu    | 0 | 14 | 14 | 7  | 5  | 0 | 11 | 1  | 1 | 12 |
| C15836749_4465485      | 23 | cuuccaguuugcuguagaggcgc   | 0 | 14 | 14 | 7  | 6  | 7 | 3  | 3  | 2 | 9  |
| C16872661_4941010      | 24 | gauuuuucuauaucgcuauggcacu | 0 | 14 | 14 | 10 | 5  | 4 | 5  | 3  | 2 | 9  |
| scaffold412062_2991948 | 24 | aaauagugcacucggauugacugc  | 0 | 14 | 14 | 6  | 5  | 6 | 7  | 8  | 2 | 4  |
| C16458688_4721205      | 21 | uuuaauuuucuccaauaucuc     | 0 | 14 | 14 | 11 | 5  | 0 | 5  | 11 | 2 | 1  |
| C17208623_5178754      | 23 | aauuuuguaguuaacuacuucc    | 0 | 14 | 14 | 11 | 4  | 2 | 6  | 12 | 2 | 0  |
| scaffold356761_2553693 | 24 | acauuuuuuucgacacuugcacc   | 0 | 14 | 14 | 10 | 7  | 2 | 5  | 3  | 3 | 8  |
| scaffold63528_465660   | 24 | uacggaccuuugcccaccggcgcc  | 0 | 14 | 14 | 4  | 10 | 7 | 3  | 3  | 3 | 8  |

|                        |    |                          |   |    |    |    |   |   |    |   |    |    |
|------------------------|----|--------------------------|---|----|----|----|---|---|----|---|----|----|
| C16720846_4852851      | 23 | auauugacucagccuuaggac    | 0 | 14 | 14 | 6  | 6 | 4 | 7  | 4 | 3  | 7  |
| scaffold90540_657918   | 24 | uucggguaccgcggauuuuacc   | 0 | 14 | 14 | 8  | 7 | 6 | 3  | 4 | 3  | 7  |
| C16580710_4779818      | 24 | cacaucaugugucgugagugcc   | 0 | 14 | 14 | 6  | 6 | 7 | 5  | 0 | 4  | 10 |
| scaffold234649_1678868 | 24 | augcauuagcaccuuuugguugc  | 0 | 14 | 14 | 10 | 5 | 5 | 4  | 3 | 4  | 7  |
| scaffold458222_3561279 | 24 | aaaccgauccaauccgaacugugu | 0 | 14 | 14 | 5  | 7 | 4 | 8  | 2 | 5  | 7  |
| C16535808_4757459      | 24 | agugaggccuaggacuggaccaac | 0 | 14 | 14 | 3  | 6 | 8 | 7  | 2 | 5  | 7  |
| scaffold96421_700742   | 24 | ucuaguaauuuggaucauuggccc | 0 | 14 | 14 | 9  | 5 | 5 | 5  | 4 | 6  | 4  |
| C16712810_4848609      | 22 | gaccagaaccacuaucacgug    | 0 | 14 | 14 | 3  | 8 | 4 | 7  | 5 | 6  | 3  |
| scaffold126955_915145  | 24 | aucccaggagguacgaucguacc  | 0 | 14 | 14 | 4  | 8 | 6 | 6  | 6 | 6  | 2  |
| C15908921_4492063      | 24 | guacucgggaucaguguccacc   | 0 | 14 | 14 | 6  | 8 | 6 | 4  | 3 | 10 | 1  |
| C16221475_4615923      | 24 | cguaucagaccgaguaaugggac  | 0 | 13 | 4  | 5  | 5 | 7 | 7  | 4 | 0  | 0  |
| C13689767_3860951      | 22 | uccuuuaggauauauauagagc   | 0 | 13 | 5  | 8  | 3 | 4 | 7  | 1 | 0  | 4  |
| scaffold322090_2301175 | 22 | augccuuacucgcuugcauug    | 0 | 13 | 6  | 9  | 6 | 4 | 3  | 1 | 1  | 4  |
| scaffold392271_2824959 | 19 | cugcuuagucaacugaugg      | 0 | 13 | 6  | 6  | 4 | 5 | 4  | 4 | 1  | 1  |
| scaffold452136_3436962 | 24 | uuucuaguaaagaccgguccuuac | 0 | 13 | 6  | 8  | 6 | 4 | 6  | 4 | 2  | 0  |
| scaffold241823_1728877 | 21 | cagagaauccucugacugauc    | 0 | 13 | 8  | 5  | 6 | 4 | 6  | 1 | 1  | 6  |
| scaffold36748_273655   | 24 | auggcuuagauuuugacagauagu | 0 | 13 | 8  | 9  | 2 | 6 | 7  | 2 | 1  | 5  |
| scaffold124867_899275  | 24 | uuuuauccuauccuguuugac    | 0 | 13 | 8  | 12 | 5 | 3 | 4  | 4 | 4  | 0  |
| scaffold448379_3378634 | 24 | ucaauuggugcccuggccugacc  | 0 | 13 | 8  | 6  | 8 | 7 | 3  | 1 | 7  | 0  |
| C15855717_4472475      | 24 | uuuguuuuucgguucuugaggcc  | 0 | 13 | 9  | 11 | 4 | 7 | 2  | 7 | 0  | 2  |
| C16335197_4664690      | 24 | uagauucugcacuaaaagguggcc | 0 | 13 | 9  | 6  | 5 | 6 | 7  | 0 | 2  | 7  |
| C17110684_5101402      | 24 | auucgaaucugccaaaccuacc   | 0 | 13 | 9  | 6  | 8 | 2 | 8  | 2 | 2  | 5  |
| scaffold455714_3503621 | 23 | cagagugaucacuaggccuggc   | 0 | 13 | 10 | 5  | 6 | 7 | 5  | 3 | 4  | 3  |
| scaffold420604_3069469 | 23 | ccacaaaauuuaucaaaaauu    | 0 | 13 | 11 | 7  | 5 | 0 | 11 | 1 | 0  | 10 |
| scaffold66925_490115   | 23 | cucuugugaauagauaggagc    | 0 | 13 | 11 | 7  | 3 | 7 | 6  | 7 | 2  | 2  |
| scaffold417295_3038616 | 24 | uacauuggcucgguccuauccgac | 0 | 13 | 11 | 7  | 7 | 6 | 4  | 2 | 3  | 6  |

|                        |    |                           |   |    |    |    |   |    |   |   |   |    |
|------------------------|----|---------------------------|---|----|----|----|---|----|---|---|---|----|
| scaffold366635_2627676 | 24 | accagagauggauguaacauaccg  | 0 | 13 | 11 | 4  | 5 | 6  | 9 | 7 | 4 | 0  |
| scaffold113081_818518  | 24 | acgaaccgcuuuaguaugccuau   | 0 | 13 | 11 | 7  | 7 | 4  | 6 | 2 | 8 | 1  |
| C17343515_5296205      | 24 | auccaggcugaauucguuaaccacc | 0 | 13 | 12 | 5  | 8 | 4  | 7 | 0 | 0 | 12 |
| scaffold442504_3299392 | 18 | agaaucaaugaccuuuu         | 0 | 13 | 12 | 5  | 4 | 2  | 7 | 1 | 0 | 11 |
| scaffold139178_1001962 | 24 | cagaggccccgcgauguuuagaac  | 0 | 13 | 12 | 4  | 7 | 7  | 6 | 1 | 1 | 10 |
| C16537140_4758051      | 24 | augcacucggucugauuuauccguu | 0 | 13 | 12 | 9  | 6 | 5  | 4 | 1 | 1 | 10 |
| scaffold450399_3408995 | 24 | agucgacugaugagcuugcucagu  | 0 | 13 | 12 | 7  | 5 | 7  | 5 | 1 | 2 | 9  |
| scaffold424462_3105478 | 24 | aggaacuggcaaaacuguugcacc  | 0 | 13 | 12 | 4  | 6 | 6  | 8 | 4 | 2 | 6  |
| scaffold155447_1116906 | 24 | aggcuauagagcgguuuugugugu  | 0 | 13 | 12 | 8  | 2 | 9  | 5 | 4 | 2 | 6  |
| scaffold356531_2551920 | 24 | gcuuagggcacacguugacaugac  | 0 | 13 | 12 | 5  | 6 | 7  | 6 | 5 | 2 | 5  |
| scaffold358264_2564495 | 24 | ugagugaccaucagucgacugagc  | 0 | 13 | 12 | 5  | 6 | 7  | 6 | 3 | 3 | 6  |
| C16590660_4785188      | 23 | cuaaaucuguuuuagcacuuuga   | 0 | 13 | 12 | 9  | 5 | 3  | 6 | 5 | 3 | 4  |
| scaffold92726_673941   | 24 | cacuuuugcugacgcguuggacgc  | 0 | 13 | 12 | 7  | 7 | 7  | 3 | 7 | 3 | 2  |
| C14881014_4164903      | 24 | aaagugggagaaacuugaagugcc  | 0 | 13 | 12 | 4  | 3 | 8  | 9 | 4 | 8 | 0  |
| scaffold159741_1145578 | 23 | uauugauuuuugucacuuugcc    | 0 | 13 | 12 | 12 | 4 | 4  | 3 | 1 | 9 | 2  |
| scaffold43132_319257   | 24 | ucgagaauuuuuggaccuaguguc  | 0 | 13 | 13 | 8  | 4 | 6  | 6 | 8 | 0 | 5  |
| C16065535_4552723      | 23 | ugcuucuccaugaauucuggugc   | 0 | 13 | 13 | 9  | 6 | 5  | 3 | 1 | 1 | 11 |
| C17336231_5289410      | 24 | auccgauacguauccugcacugau  | 0 | 13 | 13 | 7  | 7 | 4  | 6 | 2 | 1 | 10 |
| C17052633_5058579      | 24 | aagggcgaacuugggaccgugugg  | 0 | 13 | 13 | 4  | 4 | 11 | 5 | 3 | 1 | 9  |
| scaffold23401_175072   | 24 | uuaagagacuaacaauggcuuugu  | 0 | 13 | 13 | 8  | 3 | 5  | 8 | 3 | 2 | 8  |
| C13458866_3800661      | 23 | caugcacggugcugaugaagugu   | 0 | 13 | 13 | 6  | 4 | 8  | 5 | 7 | 2 | 4  |
| scaffold52091_383668   | 22 | gaaaauuugcgcuaaagggcc     | 0 | 13 | 13 | 5  | 4 | 6  | 7 | 5 | 3 | 5  |
| scaffold401184_3096704 | 24 | uuuaaugcaccgguaagaaugag   | 0 | 13 | 13 | 6  | 4 | 6  | 8 | 5 | 3 | 5  |
| scaffold41014_305625   | 24 | gauauugguacgucgccuaagaca  | 0 | 13 | 13 | 6  | 5 | 6  | 7 | 7 | 3 | 3  |
| scaffold244868_1750868 | 23 | aaauccuaucccgcguuuggcgc   | 0 | 13 | 13 | 6  | 8 | 5  | 4 | 3 | 4 | 6  |
| C17082560_5080601      | 24 | agcuuaagcgacugacaaggcuuu  | 0 | 13 | 13 | 6  | 5 | 6  | 7 | 3 | 4 | 6  |

|                        |    |                           |   |    |    |    |    |   |    |   |   |    |
|------------------------|----|---------------------------|---|----|----|----|----|---|----|---|---|----|
| C14082723_3957243      | 24 | aauggacuguccaucguguggccc  | 0 | 13 | 13 | 6  | 7  | 7 | 4  | 9 | 4 | 0  |
| scaffold308830_2204919 | 24 | accuggaacgacacaucaugugu   | 0 | 13 | 13 | 5  | 7  | 5 | 7  | 2 | 5 | 6  |
| scaffold343635_2455945 | 24 | uacgucgcuuaagagauacuuagg  | 0 | 13 | 13 | 7  | 4  | 6 | 7  | 5 | 5 | 3  |
| scaffold379486_2724295 | 24 | auuuucaaugugauaugacacacc  | 0 | 13 | 13 | 8  | 5  | 3 | 8  | 4 | 6 | 3  |
| scaffold386736_2780244 | 24 | uccgauuaaccggaccgugcacac  | 0 | 13 | 13 | 4  | 9  | 5 | 6  | 0 | 8 | 5  |
| C16337081_4665553      | 24 | ugguacuaaaacuuuuuagcacc   | 0 | 13 | 13 | 8  | 6  | 3 | 7  | 5 | 8 | 0  |
| scaffold372697_2673031 | 24 | cagguggugcuaaaugcauuuagc  | 0 | 13 | 13 | 7  | 4  | 7 | 6  | 3 | 9 | 1  |
| C15448217_4333846      | 24 | agugcuucuuuugaucuucuggcu  | 0 | 12 | 3  | 12 | 5  | 5 | 2  | 0 | 0 | 3  |
| scaffold162069_1161811 | 20 | ugcuaaaugcauuuagcacc      | 0 | 12 | 5  | 6  | 5  | 3 | 6  | 3 | 0 | 2  |
| C16607922_4794336      | 20 | ugcuaaaugcauuuagcacc      | 0 | 12 | 5  | 6  | 5  | 3 | 6  | 3 | 0 | 2  |
| scaffold429468_3155854 | 24 | uaggcaggaaguaggcgaauagac  | 0 | 12 | 5  | 3  | 3  | 9 | 9  | 4 | 1 | 0  |
| scaffold402863_2912096 | 24 | agcacaugauauguaacuuuauuc  | 0 | 12 | 6  | 8  | 4  | 3 | 9  | 3 | 1 | 2  |
| scaffold372757_2673005 | 19 | cuaaaacagauuuuagcacc      | 0 | 12 | 7  | 4  | 5  | 2 | 8  | 1 | 4 | 2  |
| scaffold93908_683115   | 21 | gugaauaccuuuuuaccucu      | 0 | 12 | 8  | 8  | 6  | 2 | 5  | 4 | 1 | 3  |
| scaffold389635_2803516 | 24 | ggcguaggcaucaccggaugaacc  | 0 | 12 | 8  | 3  | 7  | 8 | 6  | 4 | 1 | 3  |
| C16429984_4708078      | 24 | guuuuccgucuaaaaaacacuugg  | 0 | 12 | 8  | 8  | 5  | 4 | 7  | 0 | 3 | 5  |
| scaffold325137_2323066 | 24 | aaccgaaucgaacuuuuuuuuuuc  | 0 | 12 | 9  | 7  | 5  | 2 | 10 | 5 | 2 | 2  |
| scaffold71293_520739   | 25 | cuacgucgcuuugauaaucuuagg  | 0 | 12 | 9  | 9  | 6  | 5 | 5  | 6 | 3 | 0  |
| C15784811_4446735      | 24 | uaauaugguggcugaaaccggagc  | 0 | 12 | 9  | 5  | 5  | 7 | 7  | 2 | 4 | 3  |
| scaffold24203_181260   | 24 | caccugauccguguagaaggauuc  | 0 | 12 | 10 | 5  | 7  | 6 | 6  | 0 | 0 | 10 |
| scaffold238623_1705746 | 24 | uaaacuguuuuagcaccuuuauuuu | 0 | 12 | 10 | 11 | 4  | 3 | 6  | 2 | 2 | 6  |
| scaffold198994_1422232 | 24 | aaacuuuggagaaacuuuggcgcc  | 0 | 12 | 10 | 6  | 5  | 6 | 7  | 5 | 2 | 3  |
| C15999513_4526589      | 24 | aaaaccaucauaaaaaggaccagu  | 0 | 12 | 10 | 3  | 5  | 3 | 13 | 4 | 5 | 1  |
| C16625200_4802897      | 24 | aaaaccuaaccgccccgaacc     | 0 | 12 | 10 | 1  | 13 | 2 | 8  | 2 | 6 | 2  |
| C17366688_5317323      | 24 | auuggcacgauguucugucaucg   | 0 | 12 | 11 | 8  | 5  | 6 | 5  | 2 | 0 | 9  |
| scaffold102685_744018  | 22 | ucacuuuaauaaagcaggaggc    | 0 | 12 | 11 | 5  | 4  | 5 | 8  | 8 | 0 | 3  |



|                        |    |                          |   |    |    |    |   |    |    |    |   |    |
|------------------------|----|--------------------------|---|----|----|----|---|----|----|----|---|----|
| scaffold210795_1509536 | 24 | aaaguacaauccauguaaugaacc | 0 | 12 | 11 | 5  | 5 | 3  | 11 | 3  | 1 | 7  |
| C13025084_3692923      | 21 | cagaggcuccucugaucgauc    | 0 | 12 | 11 | 5  | 7 | 5  | 4  | 4  | 1 | 6  |
| scaffold443392_3310884 | 24 | auacuuuuuucgguugucaaugac | 0 | 12 | 11 | 10 | 4 | 4  | 6  | 8  | 1 | 2  |
| scaffold338623_2419031 | 24 | agaaaaccggggcuuugaacc    | 0 | 12 | 11 | 4  | 6 | 6  | 8  | 7  | 2 | 2  |
| scaffold148080_1063462 | 24 | cuuaggacacacgcuaacaugacc | 0 | 12 | 11 | 4  | 8 | 4  | 8  | 4  | 4 | 3  |
| C17185228_5159300      | 24 | acuuuuaaacacgcauuugccc   | 0 | 12 | 11 | 8  | 7 | 3  | 6  | 2  | 5 | 4  |
| scaffold174260_1246444 | 24 | gaauguacaacucauuauugcgcc | 0 | 12 | 12 | 6  | 6 | 4  | 8  | 5  | 0 | 7  |
| scaffold239006_1708382 | 24 | cagaggccccgcgauguuuagaac | 0 | 12 | 12 | 4  | 7 | 7  | 6  | 1  | 1 | 10 |
| scaffold254403_1819058 | 24 | cagucgauugaugggccuuggcuc | 0 | 12 | 12 | 7  | 6 | 8  | 3  | 3  | 1 | 8  |
| scaffold25651_192074   | 24 | gaaacugggcucuuaauuugggaa | 0 | 12 | 12 | 7  | 3 | 7  | 7  | 7  | 1 | 4  |
| C16711892_4848073      | 24 | aaccaguugucgaauaugagacac | 0 | 12 | 12 | 5  | 5 | 5  | 9  | 8  | 1 | 3  |
| C15978693_4518512      | 19 | uacaauuagaauuacaaaac     | 0 | 12 | 12 | 5  | 3 | 1  | 10 | 11 | 1 | 0  |
| C16116173_4572805      | 24 | uuuuacauguaaaucguuagugc  | 0 | 12 | 12 | 10 | 3 | 4  | 7  | 4  | 2 | 6  |
| C15470079_4340840      | 24 | uuuuacauguaaaucguuagugc  | 0 | 12 | 12 | 10 | 3 | 4  | 7  | 4  | 2 | 6  |
| C13582875_3833341      | 24 | ugucgcgcgacaauucugacuguc | 0 | 12 | 12 | 7  | 7 | 6  | 4  | 6  | 2 | 4  |
| C16322985_4659183      | 24 | uuucaaucauauaguuaacucacu | 0 | 12 | 12 | 10 | 5 | 1  | 8  | 7  | 2 | 3  |
| scaffold225204_1609947 | 24 | uaacaucaggcaauggauuacugg | 0 | 12 | 12 | 6  | 4 | 6  | 8  | 4  | 3 | 5  |
| scaffold365387_2617605 | 24 | agugcauuggguaggugaggu    | 0 | 12 | 12 | 8  | 1 | 11 | 4  | 6  | 3 | 3  |
| C13932533_3921316      | 24 | aagguuuacucgguuccuaagaac | 0 | 12 | 12 | 7  | 5 | 5  | 7  | 4  | 4 | 4  |
| scaffold320020_2286763 | 21 | uuuguccccuugguuccgcc     | 0 | 12 | 12 | 8  | 9 | 4  | 0  | 4  | 4 | 4  |
| scaffold433006_3192584 | 23 | guuacuagaguugcauugugggc  | 0 | 12 | 12 | 8  | 3 | 8  | 4  | 5  | 4 | 3  |
| C15316061_4292146      | 24 | accaaugaacuuugccacaucau  | 0 | 12 | 12 | 6  | 7 | 2  | 9  | 5  | 4 | 3  |
| scaffold291198_2081112 | 24 | aauguacaacucaugaaugcaug  | 0 | 12 | 12 | 7  | 4 | 4  | 9  | 6  | 4 | 2  |
| C16986451_5012479      | 24 | uuugggcgagugugaccugcaacc | 0 | 12 | 12 | 6  | 6 | 8  | 4  | 8  | 4 | 0  |
| scaffold280943_2008628 | 24 | uuuuugucaguuuggaccuugggc | 0 | 12 | 12 | 11 | 4 | 7  | 2  | 5  | 5 | 2  |
| scaffold454062_3471259 | 23 | cugacaccaguuauucugauuac  | 0 | 12 | 12 | 6  | 6 | 3  | 8  | 4  | 6 | 2  |

|                        |    |                           |   |    |    |   |   |   |    |   |   |   |
|------------------------|----|---------------------------|---|----|----|---|---|---|----|---|---|---|
| scaffold326073_2329700 | 22 | uuuuuaauguaaaacuugcacc    | 0 | 12 | 12 | 9 | 4 | 2 | 7  | 5 | 6 | 1 |
| scaffold50798_374609   | 24 | augaaucguuuggcacauuacuc   | 0 | 12 | 12 | 8 | 5 | 4 | 7  | 4 | 7 | 1 |
| scaffold253830_1814883 | 24 | uacaguccaucguguggugaugac  | 0 | 12 | 12 | 7 | 5 | 7 | 5  | 2 | 8 | 2 |
| scaffold142036_1021392 | 24 | ugugaacaccuuuuuugcgacc    | 0 | 12 | 12 | 8 | 7 | 4 | 5  | 3 | 8 | 1 |
| scaffold44107_326133   | 24 | gugggcgaaaaccuuguauagaguc | 0 | 11 | 2  | 6 | 4 | 8 | 6  | 2 | 0 | 0 |
| scaffold145821_1046821 | 22 | ugugcaauugguuauugaggac    | 0 | 11 | 4  | 8 | 2 | 7 | 5  | 3 | 0 | 1 |
| scaffold86192_627249   | 24 | uaagcgacuaacaauugccuuugu  | 0 | 11 | 4  | 8 | 5 | 4 | 7  | 2 | 1 | 1 |
| scaffold319407_2282113 | 24 | acacuagcgacguacauugacc    | 0 | 11 | 5  | 5 | 7 | 5 | 7  | 1 | 1 | 3 |
| scaffold328495_2346834 | 24 | ggaccuguuggguacccuugcacc  | 0 | 11 | 5  | 6 | 8 | 7 | 3  | 1 | 3 | 1 |
| scaffold48579_358547   | 20 | auacauuuaguauugcgccu      | 0 | 11 | 5  | 8 | 4 | 3 | 5  | 0 | 4 | 1 |
| C16308857_4652965      | 24 | gaacuuccgggacuggagcagccc  | 0 | 11 | 6  | 3 | 8 | 8 | 5  | 4 | 1 | 1 |
| C17284195_5243875      | 20 | ccaccaauuucacuaaaaa       | 0 | 11 | 6  | 4 | 6 | 0 | 10 | 2 | 2 | 2 |
| C14890626_4167865      | 20 | ugcuaaaugcauuuagcacc      | 0 | 11 | 7  | 6 | 5 | 3 | 6  | 3 | 1 | 3 |
| C14890624_4167863      | 20 | ugcuaaaugcauuuagcacc      | 0 | 11 | 7  | 6 | 5 | 3 | 6  | 3 | 1 | 3 |
| scaffold42494_315152   | 23 | aaucggaauacugaaauuagac    | 0 | 11 | 7  | 6 | 3 | 4 | 10 | 5 | 1 | 1 |
| scaffold161882_1160528 | 24 | uauuucauaaggguucugagcauc  | 0 | 11 | 7  | 9 | 4 | 5 | 6  | 5 | 2 | 0 |
| C17087900_5084557      | 24 | uaucggaacucuccaaugagcuc   | 0 | 11 | 8  | 6 | 8 | 4 | 6  | 6 | 1 | 1 |
| C12777361_3632172      | 21 | aacgguauaagaauuuuagag     | 0 | 11 | 8  | 6 | 1 | 5 | 9  | 3 | 3 | 2 |
| C15359789_4305912      | 21 | uuuaggacgguuuuucaucgc     | 0 | 11 | 8  | 9 | 4 | 5 | 3  | 4 | 3 | 1 |
| scaffold174005_1244868 | 21 | uuuuggcuaaaaggcgccccg     | 0 | 11 | 8  | 5 | 6 | 6 | 4  | 4 | 3 | 1 |
| scaffold17698_134868   | 24 | uuuugaagaaccgaaauuggaacc  | 0 | 11 | 10 | 6 | 4 | 5 | 9  | 8 | 0 | 2 |
| scaffold65488_479717   | 23 | aaauauaugucuccuaagugacu   | 0 | 11 | 10 | 8 | 4 | 3 | 8  | 2 | 1 | 7 |
| scaffold37128_276426   | 24 | cagucauguaggguucuaugac    | 0 | 11 | 10 | 8 | 5 | 6 | 5  | 3 | 1 | 6 |
| scaffold300696_2148560 | 23 | augagguaaaacguuuuuugau    | 0 | 11 | 10 | 8 | 1 | 5 | 9  | 5 | 1 | 4 |
| scaffold38922_289676   | 24 | ucagucaacugaguaaggcucauc  | 0 | 11 | 10 | 6 | 6 | 5 | 7  | 6 | 1 | 3 |
| scaffold85154_619448   | 24 | ggauguacaacucauuuauugcgcc | 0 | 11 | 10 | 6 | 6 | 5 | 7  | 1 | 2 | 7 |

|                        |    |                           |   |    |    |   |   |   |    |   |   |   |
|------------------------|----|---------------------------|---|----|----|---|---|---|----|---|---|---|
| C12737445_3622514      | 24 | aaacauuuagggguuaggacaac   | 0 | 11 | 10 | 5 | 3 | 6 | 10 | 7 | 2 | 1 |
| scaffold40579_302105   | 20 | aucagucgacugauggccua      | 0 | 11 | 10 | 5 | 5 | 5 | 5  | 2 | 3 | 5 |
| scaffold40579_302106   | 20 | aucagucgacugauggccua      | 0 | 11 | 10 | 5 | 5 | 5 | 5  | 2 | 3 | 5 |
| scaffold407467_2951723 | 24 | aaaacguagcuaaagcccuggucc  | 0 | 11 | 10 | 4 | 7 | 5 | 8  | 4 | 3 | 3 |
| scaffold212760_1522886 | 24 | cguguucggguugugucaacacac  | 0 | 11 | 10 | 7 | 6 | 7 | 4  | 5 | 3 | 2 |
| scaffold447975_3372607 | 24 | aguuuauacugguacucaagaac   | 0 | 11 | 10 | 7 | 5 | 4 | 8  | 6 | 3 | 1 |
| scaffold432418_3186374 | 24 | guuuauuuucagccuuaggacc    | 0 | 11 | 10 | 9 | 6 | 4 | 5  | 1 | 6 | 3 |
| C13585049_3833923      | 24 | uaagauccaguagaauaagugaac  | 0 | 11 | 10 | 5 | 3 | 5 | 11 | 3 | 7 | 0 |
| C17273379_5234004      | 24 | ggaccagauuuccauuuucugcau  | 0 | 11 | 11 | 9 | 6 | 4 | 5  | 3 | 2 | 6 |
| C16204813_4608874      | 24 | aaugcauuggcucggcuccuaagc  | 0 | 11 | 11 | 6 | 7 | 6 | 5  | 5 | 2 | 4 |
| scaffold51518_387707   | 23 | ucacucguagagccauacaagu    | 0 | 11 | 11 | 6 | 6 | 4 | 7  | 6 | 2 | 3 |
| scaffold51518_387709   | 23 | ucacucguagagccauacaagu    | 0 | 11 | 11 | 6 | 6 | 4 | 7  | 6 | 2 | 3 |
| C16600900_4790505      | 24 | caagcaugaacuuauagacacauc  | 0 | 11 | 11 | 5 | 6 | 3 | 10 | 7 | 2 | 2 |
| scaffold218519_1561935 | 24 | aaaguacaacucauuuaaugcauc  | 0 | 11 | 11 | 7 | 5 | 2 | 10 | 3 | 3 | 5 |
| C17346259_5298644      | 20 | caucagucgacugauggccu      | 0 | 11 | 11 | 5 | 6 | 5 | 4  | 3 | 3 | 5 |
| scaffold169075_1210107 | 24 | uacgucgcuuaggauucuucuagg  | 0 | 11 | 11 | 9 | 5 | 6 | 4  | 4 | 3 | 4 |
| scaffold1318_10027     | 24 | guagcuguuuaggaaacccggggc  | 0 | 11 | 11 | 5 | 5 | 9 | 5  | 6 | 3 | 2 |
| scaffold359681_2574794 | 24 | cagucgcuuaagaacuacagccac  | 0 | 11 | 11 | 4 | 8 | 4 | 8  | 8 | 3 | 0 |
| scaffold13986_106078   | 24 | guucgaaccuccuaguggcacuc   | 0 | 11 | 11 | 6 | 9 | 5 | 4  | 1 | 5 | 5 |
| C13223985_3741788      | 24 | guucgaaccuccuaguggcacuc   | 0 | 11 | 11 | 6 | 9 | 5 | 4  | 1 | 5 | 5 |
| scaffold285320_2039803 | 24 | cgaguguggccuacucguaugacc  | 0 | 11 | 11 | 6 | 7 | 7 | 4  | 3 | 6 | 2 |
| C16254615_4629734      | 23 | aaccaggaccacuaccacauga    | 0 | 11 | 11 | 2 | 9 | 3 | 9  | 0 | 7 | 4 |
| C16469812_4726325      | 24 | cauuagucgacugauggccuugacc | 0 | 11 | 11 | 7 | 7 | 5 | 5  | 3 | 8 | 0 |
| C14462608_4052213      | 24 | gcaccuccgguuuugauuaaacu   | 0 | 11 | 11 | 8 | 6 | 5 | 5  | 1 | 9 | 1 |
| scaffold108518_785174  | 24 | auacucagugguuaggagccaagc  | 0 | 10 | 2  | 5 | 5 | 7 | 7  | 2 | 0 | 0 |
| C17304389_5261663      | 24 | ccguauggacaaaacgucuugguc  | 0 | 10 | 3  | 6 | 6 | 6 | 6  | 2 | 1 | 0 |

|                        |    |                           |   |    |   |    |    |    |    |   |   |   |
|------------------------|----|---------------------------|---|----|---|----|----|----|----|---|---|---|
| C13466240_3802605      | 22 | agcacucgugagcaugguccac    | 0 | 10 | 3 | 4  | 7  | 6  | 5  | 0 | 3 | 0 |
| scaffold347703_2486092 | 24 | ucacgugaugugggauauugugg   | 0 | 10 | 4 | 9  | 2  | 9  | 4  | 0 | 3 | 1 |
| C14004911_3938865      | 20 | ugcuaaaugcauuuagcacc      | 0 | 10 | 5 | 6  | 5  | 3  | 6  | 3 | 0 | 2 |
| C17346407_5298764      | 22 | aacggcuugauaaucaugugac    | 0 | 10 | 6 | 6  | 4  | 5  | 7  | 4 | 2 | 0 |
| scaffold451469_3425813 | 23 | uuuccuuauaucugauuggugcc   | 0 | 10 | 6 | 11 | 5  | 4  | 3  | 1 | 4 | 1 |
| C13316465_3764703      | 24 | aaaagccaacugggggcaauugcc  | 0 | 10 | 7 | 3  | 6  | 7  | 8  | 3 | 0 | 4 |
| C15466611_4339696      | 24 | ugcuuuacucgguuccuuugggcc  | 0 | 10 | 7 | 10 | 7  | 6  | 1  | 1 | 1 | 5 |
| scaffold422653_3088657 | 24 | gcaagucacucgguucuaaagaac  | 0 | 10 | 8 | 5  | 6  | 5  | 8  | 1 | 0 | 7 |
| scaffold442345_3297492 | 22 | auaucggauccacuauaguuu     | 0 | 10 | 8 | 8  | 5  | 3  | 6  | 1 | 0 | 7 |
| C13418754_3790586      | 24 | guugacgaggacgucgauuccuu   | 0 | 10 | 8 | 7  | 6  | 7  | 4  | 6 | 0 | 2 |
| scaffold309170_2207179 | 24 | acucguaugaccauuuucaaaaac  | 0 | 10 | 8 | 7  | 6  | 2  | 9  | 2 | 4 | 2 |
| scaffold59791_440083   | 23 | ugcuuauuguaauuuucccucuuc  | 0 | 10 | 8 | 12 | 6  | 2  | 3  | 0 | 6 | 2 |
| scaffold360027_2577128 | 24 | uauuuuuuccggcgcgucuaacgc  | 0 | 10 | 9 | 8  | 8  | 5  | 3  | 4 | 0 | 5 |
| scaffold426986_3129908 | 24 | uuuuucggucuaauucggguaccc  | 0 | 10 | 9 | 10 | 6  | 5  | 3  | 1 | 1 | 7 |
| C17021301_5036327      | 24 | gggaaucagaacucguguagcuc   | 0 | 10 | 9 | 6  | 5  | 7  | 6  | 3 | 2 | 4 |
| scaffold215767_1542619 | 24 | uuggauugcaaaccguuggcacu   | 0 | 10 | 9 | 8  | 5  | 6  | 5  | 3 | 2 | 4 |
| scaffold348188_2489635 | 24 | cgguuuucgaaugggucuaaacac  | 0 | 10 | 9 | 9  | 5  | 5  | 5  | 4 | 2 | 3 |
| scaffold219220_1566612 | 24 | auacuaaagcgacugacaguagu   | 0 | 10 | 9 | 7  | 4  | 5  | 8  | 5 | 2 | 2 |
| scaffold204804_1465142 | 23 | aggucacucagucuuagggaacc   | 0 | 10 | 9 | 5  | 6  | 5  | 7  | 2 | 3 | 4 |
| scaffold57399_422916   | 24 | agcugccccuccuuggcuugggcc  | 0 | 10 | 9 | 6  | 10 | 7  | 1  | 2 | 3 | 4 |
| scaffold394529_2843667 | 24 | uuuagaacuagauaaauauauacc  | 0 | 10 | 9 | 8  | 3  | 2  | 11 | 4 | 3 | 2 |
| scaffold35737_266067   | 24 | caacgguuuuucgucgcuaaaaac  | 0 | 10 | 9 | 7  | 6  | 4  | 7  | 3 | 4 | 2 |
| scaffold133796_963754  | 24 | agagucguggauugggguguuacac | 0 | 10 | 9 | 7  | 3  | 10 | 4  | 3 | 4 | 2 |
| scaffold197771_1413621 | 24 | uaagacuuggagcauuacuaaccc  | 0 | 10 | 9 | 6  | 6  | 4  | 8  | 5 | 4 | 0 |
| scaffold197771_1413623 | 24 | uaagacuuggagcauuacuaaccc  | 0 | 10 | 9 | 6  | 6  | 4  | 8  | 5 | 4 | 0 |
| C16202315_4607902      | 22 | uuguguaucuuuuucgggauc     | 0 | 10 | 9 | 11 | 3  | 6  | 2  | 4 | 5 | 0 |

|                        |    |                          |   |    |    |    |   |   |    |   |   |   |
|------------------------|----|--------------------------|---|----|----|----|---|---|----|---|---|---|
| C13472432_3804310      | 24 | aauggcuuugucugucucuuaagc | 0 | 10 | 10 | 10 | 5 | 5 | 4  | 6 | 1 | 3 |
| scaffold12596_94961    | 24 | uuucuuaggcgacguacauugguc | 0 | 10 | 10 | 9  | 5 | 6 | 4  | 6 | 4 | 0 |
| scaffold147063_1056244 | 21 | uuuacgggcgcgagacagugg    | 0 | 10 | 10 | 4  | 4 | 9 | 4  | 5 | 5 | 0 |
| scaffold191031_1364448 | 24 | cagggaauuuacggcauuuguac  | 0 | 9  | 4  | 8  | 4 | 6 | 6  | 0 | 2 | 2 |
| scaffold443021_3305702 | 24 | uguuauaacgggucuucggagaac | 0 | 9  | 4  | 7  | 4 | 7 | 6  | 0 | 4 | 0 |
| scaffold449856_3400660 | 22 | ugaccugaucaguuagcuguu    | 0 | 9  | 5  | 8  | 5 | 5 | 4  | 0 | 0 | 5 |
| scaffold154642_1110663 | 22 | aguuucgcuguggugcuaaaac   | 0 | 9  | 5  | 7  | 4 | 6 | 5  | 0 | 1 | 4 |
| scaffold233971_1673935 | 24 | caaugugcgucgcguaagaaccu  | 0 | 9  | 6  | 5  | 6 | 6 | 7  | 1 | 0 | 5 |
| scaffold185605_1325500 | 24 | gcuuacuuaaggcgacauuaaacu | 0 | 9  | 6  | 7  | 5 | 4 | 8  | 3 | 0 | 3 |
| scaffold114732_830147  | 24 | cauaccuacaccaucagguggu   | 0 | 9  | 6  | 6  | 8 | 4 | 6  | 3 | 1 | 2 |
| scaffold455701_3503174 | 24 | accgaaauucguuaaagaugaacc | 0 | 9  | 6  | 5  | 6 | 4 | 9  | 3 | 1 | 2 |
| scaffold447355_3363579 | 24 | aaaucuaaccggugacaugauc   | 0 | 9  | 6  | 6  | 6 | 4 | 8  | 4 | 1 | 1 |
| scaffold373545_2678745 | 24 | aauguuuacuugguuuuuagaac  | 0 | 9  | 6  | 11 | 2 | 4 | 7  | 4 | 2 | 0 |
| scaffold353737_2531530 | 23 | accuuagggcacauguuaacac   | 0 | 9  | 6  | 5  | 6 | 4 | 8  | 1 | 3 | 2 |
| scaffold143025_1028015 | 24 | cauugucagucgcuuaagcuggac | 0 | 9  | 7  | 7  | 6 | 6 | 5  | 1 | 0 | 6 |
| C16644488_4812506      | 24 | gauugcuugauuaauuguuagac  | 0 | 9  | 7  | 10 | 2 | 5 | 7  | 4 | 0 | 3 |
| scaffold424980_3110675 | 22 | ugaaaugucaugaacaugauu    | 0 | 9  | 7  | 7  | 2 | 4 | 9  | 4 | 1 | 2 |
| C15442377_4331785      | 24 | gagauuugauagcccacgauggac | 0 | 9  | 7  | 5  | 5 | 7 | 7  | 5 | 2 | 0 |
| scaffold288878_2065278 | 20 | caucagucgacugaugcuug     | 0 | 9  | 8  | 6  | 5 | 5 | 4  | 6 | 0 | 2 |
| C16055563_4548639      | 24 | aaguuuucagauuuuagugguuuc | 0 | 9  | 8  | 11 | 2 | 5 | 6  | 6 | 1 | 1 |
| scaffold377080_2705144 | 24 | acugaaauuaguauugcugaugcc | 0 | 9  | 8  | 8  | 4 | 5 | 7  | 6 | 1 | 1 |
| scaffold17679_133302   | 23 | aaucuuacaccgguguaacuuga  | 0 | 9  | 8  | 7  | 5 | 4 | 7  | 7 | 1 | 0 |
| scaffold442737_3302313 | 23 | aauuuaggauuccaaagaagu    | 0 | 9  | 8  | 7  | 2 | 4 | 10 | 1 | 2 | 5 |
| scaffold216791_1550066 | 24 | cuuaggcgccacguuaacaugacc | 0 | 9  | 8  | 5  | 7 | 6 | 6  | 1 | 2 | 5 |
| C16616674_4798473      | 24 | uguaucacauggauuguuaccu   | 0 | 9  | 8  | 10 | 4 | 5 | 5  | 2 | 2 | 4 |
| scaffold21742_162383   | 23 | acucuaaggccucguuugauucg  | 0 | 9  | 8  | 8  | 6 | 5 | 4  | 2 | 2 | 4 |

|                        |    |                           |   |   |   |   |    |   |   |   |   |   |
|------------------------|----|---------------------------|---|---|---|---|----|---|---|---|---|---|
| scaffold62789_461271   | 18 | cugcaaugugaacuuugc        | 0 | 9 | 8 | 6 | 4  | 4 | 4 | 3 | 2 | 3 |
| scaffold256827_1835855 | 24 | augaaacuugguggagauaaucuc  | 0 | 9 | 8 | 7 | 3  | 6 | 8 | 3 | 2 | 3 |
| C16009023_4530186      | 24 | aaauuuucccuugugcugaagccc  | 0 | 9 | 8 | 8 | 7  | 4 | 5 | 4 | 3 | 1 |
| C16155703_4588643      | 24 | uuuaaacaccggaccaguauuggc  | 0 | 9 | 8 | 6 | 6  | 5 | 7 | 5 | 3 | 0 |
| scaffold61477_451976   | 24 | auucggagcauccaaccuaaaacc  | 0 | 9 | 9 | 4 | 8  | 3 | 9 | 5 | 4 | 0 |
| C16562446_4770945      | 24 | aacucacccaucaggcaaccuccc  | 0 | 9 | 9 | 3 | 12 | 2 | 7 | 0 | 9 | 0 |
| scaffold277648_1985893 | 24 | guaccguuggaugggugcuaaaacu | 0 | 8 | 2 | 7 | 4  | 8 | 5 | 2 | 0 | 0 |
| scaffold452391_3441065 | 24 | cacucucauuuuaaaaaaucuc    | 0 | 8 | 2 | 8 | 7  | 1 | 8 | 2 | 0 | 0 |
| C13479752_3806190      | 21 | ccugucaaccaucagagacuc     | 0 | 8 | 3 | 4 | 8  | 3 | 6 | 1 | 2 | 0 |
| C14771458_4134566      | 24 | acacuuaggagacgcacauaugac  | 0 | 8 | 4 | 5 | 6  | 5 | 8 | 0 | 2 | 2 |
| scaffold368785_2644119 | 24 | aaauaacgggucuaacgggugacc  | 0 | 8 | 5 | 5 | 5  | 7 | 7 | 1 | 2 | 2 |
| scaffold179399_1282434 | 23 | acuugcaugugggggagucuaa    | 0 | 8 | 5 | 6 | 4  | 8 | 5 | 3 | 2 | 0 |
| scaffold283946_2030231 | 24 | cacauuauucaguauuucaggcc   | 0 | 8 | 5 | 8 | 6  | 3 | 7 | 1 | 3 | 1 |
| C15069464_4218663      | 24 | uucgucgccuaagaauaucuuagg  | 0 | 8 | 6 | 8 | 5  | 5 | 6 | 2 | 0 | 4 |
| C14823168_4148692      | 24 | aggccccgggaauuuguggaugacu | 0 | 8 | 7 | 6 | 4  | 9 | 5 | 2 | 0 | 5 |
| C13768209_3882085      | 24 | ccauggauuagacugauaucugcu  | 0 | 8 | 7 | 8 | 5  | 5 | 6 | 4 | 0 | 3 |
| scaffold412571_2995985 | 24 | uacggaaauuucaagugcagacc   | 0 | 8 | 7 | 6 | 5  | 5 | 8 | 6 | 0 | 1 |
| scaffold121806_878698  | 24 | gcccuuggacgauacaucaugugu  | 0 | 8 | 7 | 7 | 6  | 6 | 5 | 0 | 1 | 6 |
| scaffold160870_1153351 | 24 | uaugucaacugaguaaguguaccu  | 0 | 8 | 7 | 8 | 4  | 5 | 7 | 4 | 1 | 2 |
| scaffold401343_2898990 | 24 | aacaaauucauuugggcuugguc   | 0 | 8 | 7 | 9 | 4  | 5 | 6 | 5 | 1 | 1 |
| C14747812_4128079      | 23 | uuuccugacgcguuggacgcgcc   | 0 | 8 | 7 | 6 | 8  | 7 | 2 | 1 | 2 | 4 |
| scaffold432418_3186380 | 24 | aggauuauucgguccuugagaacc  | 0 | 8 | 7 | 7 | 5  | 6 | 6 | 3 | 2 | 2 |
| scaffold228120_1631586 | 24 | agaacuaggcucuuaauauggac   | 0 | 8 | 7 | 7 | 4  | 6 | 7 | 3 | 2 | 2 |
| scaffold190985_1364335 | 24 | cugcauagucuucacuccaugac   | 0 | 8 | 7 | 8 | 8  | 3 | 5 | 1 | 3 | 3 |
| scaffold426936_3129489 | 24 | uuacauuauucaguccuugacaac  | 0 | 8 | 7 | 9 | 6  | 2 | 7 | 3 | 3 | 1 |
| scaffold312495_2231442 | 24 | accucacgcgauguucugaacauc  | 0 | 8 | 7 | 6 | 8  | 4 | 6 | 0 | 4 | 3 |

|                        |    |                           |   |   |   |    |   |    |    |   |   |   |
|------------------------|----|---------------------------|---|---|---|----|---|----|----|---|---|---|
| scaffold44004_325591   | 23 | ugcaguuggugucauuuauga     | 0 | 8 | 7 | 9  | 2 | 7  | 5  | 1 | 5 | 1 |
| C16775009_4882890      | 24 | caacagacaugcagcgaggac     | 0 | 7 | 2 | 1  | 7 | 7  | 9  | 0 | 0 | 2 |
| C16753386_4870560      | 24 | uuuagcacuauucuaguuuugggc  | 0 | 7 | 2 | 11 | 4 | 5  | 4  | 0 | 0 | 2 |
| C15354531_4304353      | 23 | aggguggauaggauuuuaaac     | 0 | 7 | 2 | 8  | 1 | 7  | 7  | 2 | 0 | 0 |
| C17389420_5336880      | 24 | auuaguuuuugucgguuugggccu  | 0 | 7 | 3 | 12 | 3 | 7  | 2  | 0 | 0 | 3 |
| scaffold210705_1509139 | 24 | ggugauuuuguugccguguaagccu | 0 | 7 | 3 | 9  | 4 | 8  | 3  | 0 | 0 | 3 |
| scaffold172178_1232047 | 23 | gaauggaccgaccuaaccgaacc   | 0 | 7 | 4 | 2  | 8 | 5  | 8  | 3 | 1 | 0 |
| scaffold362529_2596144 | 21 | ggguggucgcgguucgguuac     | 0 | 7 | 4 | 6  | 4 | 10 | 1  | 0 | 3 | 1 |
| C16248225_4627090      | 21 | uagagacuccucugauugauc     | 0 | 7 | 5 | 7  | 5 | 4  | 5  | 0 | 0 | 5 |
| scaffold248122_1775190 | 24 | guaacuuguaaaccgucuucucac  | 0 | 7 | 5 | 9  | 7 | 3  | 5  | 0 | 5 | 0 |
| scaffold284961_2037233 | 24 | ugagaauugucguagacauguacu  | 0 | 7 | 6 | 8  | 3 | 6  | 7  | 1 | 0 | 5 |
| scaffold380573_2732622 | 24 | auuuucgguauaccaaguucggu   | 0 | 7 | 6 | 9  | 4 | 5  | 6  | 2 | 0 | 4 |
| scaffold38074_283515   | 24 | aauuucacauggaaaguuuuagcu  | 0 | 7 | 6 | 9  | 3 | 4  | 8  | 2 | 1 | 3 |
| scaffold430393_3165409 | 23 | ugucgcuaggaccuuuuguaagu   | 0 | 7 | 6 | 8  | 4 | 7  | 4  | 1 | 2 | 3 |
| scaffold387110_2783169 | 24 | auaaaauagaaagaauaaaagcc   | 0 | 7 | 6 | 4  | 2 | 3  | 15 | 4 | 2 | 0 |
| C15629439_4393531      | 24 | auuuuugggccuugucggaucgcc  | 0 | 7 | 6 | 9  | 6 | 7  | 2  | 3 | 3 | 0 |
| scaffold171922_1230190 | 24 | uuugacuuuaugcaauccuagacc  | 0 | 6 | 1 | 9  | 6 | 3  | 6  | 0 | 0 | 1 |
| C13212363_3738910      | 24 | aguuuuuuguagguugggauggccu | 0 | 6 | 2 | 10 | 2 | 9  | 3  | 0 | 0 | 2 |
| scaffold267812_1915071 | 24 | cgugcaaggcacauuuuuuau     | 0 | 6 | 2 | 8  | 4 | 5  | 7  | 0 | 2 | 0 |
| scaffold210705_1509138 | 24 | ggugauuuuguugccguguaagccu | 0 | 6 | 3 | 9  | 4 | 8  | 3  | 0 | 0 | 3 |
| scaffold344038_2458736 | 24 | uucagguucgaacucuggcgagcc  | 0 | 6 | 3 | 6  | 7 | 7  | 4  | 0 | 0 | 3 |
| scaffold196369_1403382 | 23 | ucagauuuugucacggccuuuggc  | 0 | 6 | 3 | 8  | 6 | 6  | 3  | 2 | 0 | 1 |
| C15743719_4432527      | 20 | auacucaguccuucacaacc      | 0 | 6 | 3 | 5  | 8 | 1  | 6  | 3 | 0 | 0 |
| scaffold344599_2463829 | 21 | uaaguuuuugucgugcucauc     | 0 | 6 | 3 | 10 | 4 | 4  | 3  | 2 | 1 | 0 |
| scaffold27744_207775   | 24 | uaaaggauccaagagcaagucuuc  | 0 | 6 | 3 | 5  | 5 | 5  | 9  | 2 | 1 | 0 |
| scaffold372829_2673525 | 21 | uacguggagcauuaucauugg     | 0 | 6 | 3 | 7  | 3 | 6  | 5  | 1 | 2 | 0 |

|                        |    |                           |   |   |   |    |   |    |    |   |   |   |
|------------------------|----|---------------------------|---|---|---|----|---|----|----|---|---|---|
| scaffold132361_953664  | 24 | uccucaggcgaacacggugagaac  | 0 | 6 | 4 | 3  | 7 | 7  | 7  | 3 | 0 | 1 |
| scaffold456665_3524465 | 24 | acaauguguauuuuuuggugcu    | 0 | 6 | 4 | 11 | 2 | 5  | 6  | 3 | 0 | 1 |
| scaffold349078_2496334 | 24 | aaugugcgucuccaagcagggcc   | 0 | 6 | 4 | 5  | 7 | 7  | 5  | 4 | 0 | 0 |
| scaffold12669_95691    | 23 | guaucgagacuaauuuauuggg    | 0 | 6 | 4 | 8  | 2 | 6  | 7  | 3 | 1 | 0 |
| C13969237_3930096      | 24 | augauuuuagcaccuucugauugu  | 0 | 6 | 4 | 11 | 4 | 4  | 5  | 1 | 2 | 1 |
| scaffold135654_977315  | 22 | uuuagaguccaguuuuccuuuug   | 0 | 6 | 4 | 10 | 4 | 4  | 4  | 1 | 3 | 0 |
| scaffold407275_2949970 | 22 | uuccaagcauagauucuguucu    | 0 | 6 | 5 | 9  | 5 | 3  | 5  | 0 | 0 | 5 |
| scaffold277949_1987756 | 24 | auaaagguacaacucauuuaaugc  | 0 | 6 | 5 | 7  | 4 | 3  | 10 | 1 | 0 | 4 |
| scaffold176121_1259037 | 23 | auaauguuuauaaauaccgaga    | 0 | 6 | 5 | 8  | 2 | 3  | 10 | 1 | 0 | 4 |
| scaffold80914_588352   | 24 | agauuuuugguagggugguuccc   | 0 | 6 | 5 | 9  | 4 | 8  | 3  | 2 | 1 | 2 |
| scaffold34131_254467   | 24 | gaaugaugguaggauauacacugu  | 0 | 6 | 5 | 7  | 2 | 7  | 8  | 0 | 2 | 3 |
| C16331355_4662858      | 24 | aaguauccgugcuauaguaguauc  | 0 | 6 | 5 | 8  | 4 | 5  | 7  | 0 | 2 | 3 |
| scaffold44194_326731   | 22 | uuccauggacuugcuaguuuucu   | 0 | 6 | 5 | 10 | 5 | 4  | 3  | 0 | 2 | 3 |
| C16974061_5003976      | 24 | guggcucgugauggacuuggccc   | 0 | 6 | 5 | 6  | 6 | 9  | 3  | 1 | 2 | 2 |
| scaffold158249_1135579 | 24 | aguguaaaugguacaacacugacc  | 0 | 6 | 5 | 5  | 5 | 5  | 9  | 1 | 2 | 2 |
| C14922832_4176962      | 24 | auucaaugaauuaccaguauuuac  | 0 | 6 | 5 | 8  | 4 | 2  | 10 | 2 | 2 | 1 |
| C15011298_4201740      | 24 | aauggcugaagugaugguucugac  | 0 | 6 | 5 | 7  | 3 | 8  | 6  | 3 | 2 | 0 |
| scaffold193716_1384223 | 24 | auaaauagaauucgaugggccuc   | 0 | 6 | 5 | 6  | 5 | 5  | 8  | 3 | 2 | 0 |
| scaffold311775_2226174 | 20 | gccccuugagugcucaaccu      | 0 | 5 | 1 | 6  | 7 | 4  | 3  | 0 | 0 | 1 |
| scaffold370151_2654517 | 24 | gccuugcucggugugaaggaccu   | 0 | 5 | 2 | 7  | 6 | 8  | 3  | 0 | 0 | 2 |
| scaffold149400_1072256 | 21 | uuuuaaccuaguucaucuccuc    | 0 | 5 | 2 | 8  | 7 | 1  | 5  | 0 | 1 | 1 |
| scaffold149400_1072260 | 21 | uuuuaaccuaguucaucuccuc    | 0 | 5 | 2 | 8  | 7 | 1  | 5  | 0 | 1 | 1 |
| scaffold62528_459534   | 25 | uacaguaagucagcgaagaauugcc | 0 | 5 | 2 | 5  | 5 | 6  | 9  | 1 | 1 | 0 |
| scaffold84191_612507   | 24 | cuagggcccccugacauagcagggc | 0 | 5 | 2 | 3  | 8 | 8  | 5  | 0 | 2 | 0 |
| scaffold95413_693584   | 24 | aggaagucugggcuagcuaagagg  | 0 | 5 | 3 | 4  | 3 | 10 | 7  | 0 | 0 | 3 |
| scaffold191809_1370726 | 24 | ccgguauagggauuuuggcauacc  | 0 | 5 | 3 | 7  | 5 | 7  | 5  | 1 | 0 | 2 |



|                        |    |                           |   |   |   |    |   |    |    |   |   |   |
|------------------------|----|---------------------------|---|---|---|----|---|----|----|---|---|---|
| C17121982_5109821      | 23 | agucgagucucacuagcugcaaa   | 0 | 5 | 3 | 5  | 6 | 5  | 7  | 2 | 0 | 1 |
| scaffold17578_132678   | 24 | gccugaaauguuuguccgagac    | 0 | 5 | 3 | 7  | 6 | 6  | 5  | 3 | 0 | 0 |
| scaffold272525_1949617 | 23 | cuccaaggacugaguaugugcac   | 0 | 5 | 3 | 5  | 6 | 6  | 6  | 2 | 1 | 0 |
| C16935485_4979625      | 22 | cucccaugacacaucauguguc    | 0 | 5 | 4 | 6  | 8 | 3  | 5  | 0 | 0 | 4 |
| scaffold254169_1817176 | 24 | gaggacaugugaucuuguugucc   | 0 | 5 | 4 | 8  | 4 | 8  | 4  | 1 | 0 | 3 |
| C15367749_4308278      | 24 | uuugcuauugagaguuaucacgac  | 0 | 5 | 4 | 9  | 4 | 5  | 6  | 2 | 0 | 2 |
| C16856539_4930971      | 24 | cuuggcaaaugaaugugacacc    | 0 | 5 | 4 | 5  | 5 | 6  | 8  | 2 | 0 | 2 |
| C12890673_3659837      | 24 | cguggaaucceaugaucgaucaug  | 0 | 5 | 4 | 6  | 6 | 6  | 6  | 2 | 0 | 2 |
| C14129433_3968418      | 24 | cguggaaucceaugaucgaucaug  | 0 | 5 | 4 | 6  | 6 | 6  | 6  | 2 | 0 | 2 |
| scaffold153945_1104834 | 24 | auuaucuuuuauccauuagaac    | 0 | 5 | 4 | 10 | 5 | 1  | 8  | 4 | 0 | 0 |
| scaffold245811_1757532 | 21 | ggaugaaggcauuggacauga     | 0 | 5 | 4 | 4  | 2 | 8  | 7  | 4 | 0 | 0 |
| scaffold63212_463967   | 24 | auuccacuuaggugacguacacug  | 0 | 5 | 4 | 7  | 6 | 5  | 6  | 0 | 1 | 3 |
| scaffold229955_1645133 | 23 | agcaguaccgauagcuagacucg   | 0 | 5 | 4 | 4  | 6 | 6  | 7  | 1 | 1 | 2 |
| scaffold194998_1393267 | 24 | aaucgaaccauucaaucuugaau   | 0 | 5 | 4 | 7  | 5 | 2  | 10 | 0 | 2 | 2 |
| scaffold49275_364005   | 24 | gagcacuagugccaucuauaccgg  | 0 | 5 | 4 | 5  | 7 | 6  | 6  | 1 | 2 | 1 |
| scaffold447092_3360080 | 24 | aaacauuggaucgguuugguuauuc | 0 | 5 | 4 | 9  | 3 | 6  | 6  | 2 | 2 | 0 |
| scaffold324402_2317384 | 24 | uggaaauaaguagagccuggugcc  | 0 | 5 | 4 | 5  | 4 | 8  | 7  | 2 | 2 | 0 |
| C15531717_4360889      | 24 | ucacguguuggcgcgugucggacc  | 0 | 5 | 4 | 6  | 7 | 9  | 2  | 1 | 3 | 0 |
| C17242221_5207555      | 18 | uuuuuaucggguuauua         | 0 | 4 | 1 | 10 | 1 | 4  | 3  | 0 | 0 | 1 |
| C16749960_4868733      | 24 | gaagcaaaccgguuguugcccgauc | 0 | 4 | 1 | 5  | 6 | 7  | 6  | 0 | 0 | 1 |
| scaffold150107_1077692 | 23 | uuuagggauccagcuuuuaaac    | 0 | 4 | 1 | 7  | 5 | 4  | 7  | 0 | 0 | 1 |
| C15033704_4208354      | 24 | guagucgcauagauuuuuuagc    | 0 | 4 | 1 | 8  | 4 | 5  | 7  | 1 | 0 | 0 |
| scaffold376851_2703026 | 22 | agaggguuuucugugugagugu    | 0 | 4 | 1 | 9  | 1 | 9  | 3  | 1 | 0 | 0 |
| scaffold194561_1390104 | 23 | aucuuuccggcgguuugaaac     | 0 | 4 | 1 | 7  | 7 | 5  | 4  | 1 | 0 | 0 |
| scaffold239948_1715159 | 24 | uuuagaggcguuugaggcgugcgc  | 0 | 4 | 1 | 6  | 4 | 10 | 4  | 0 | 1 | 0 |
| scaffold17276_131279   | 22 | uacauuuacucacuugucauug    | 0 | 4 | 1 | 10 | 5 | 2  | 5  | 0 | 1 | 0 |

|                        |    |                          |   |   |   |    |    |   |    |   |   |   |
|------------------------|----|--------------------------|---|---|---|----|----|---|----|---|---|---|
| scaffold43138_319283   | 22 | acuuuagugacugacaauugcu   | 0 | 4 | 1 | 7  | 4  | 4 | 7  | 0 | 1 | 0 |
| scaffold217211_1553357 | 24 | aaaacauacuguagaacugcauc  | 0 | 4 | 2 | 5  | 5  | 3 | 11 | 1 | 0 | 1 |
| scaffold185778_1326806 | 24 | auugaauggugaccuccaaaaac  | 0 | 4 | 2 | 5  | 5  | 5 | 9  | 2 | 0 | 0 |
| scaffold21092_158028   | 24 | gcuuuugcccaccaugaacacuc  | 0 | 4 | 2 | 6  | 10 | 3 | 5  | 2 | 0 | 0 |
| scaffold449917_3401675 | 20 | ggaggacggacuuggaguc      | 0 | 4 | 2 | 3  | 3  | 9 | 5  | 2 | 0 | 0 |
| scaffold129093_930095  | 24 | aaagucuuuuagucgcuuaagc   | 0 | 4 | 2 | 8  | 4  | 5 | 7  | 2 | 0 | 0 |
| scaffold46566_343568   | 21 | uuuacugcggacuggucugc     | 0 | 4 | 2 | 6  | 5  | 6 | 4  | 0 | 1 | 1 |
| scaffold415248_3020075 | 24 | guucgguuucuaaaucuuuaaac  | 0 | 4 | 2 | 10 | 5  | 3 | 6  | 0 | 1 | 1 |
| scaffold210212_1507385 | 24 | ccagagugaucaguugggccuggc | 0 | 4 | 2 | 5  | 6  | 9 | 4  | 1 | 1 | 0 |
| scaffold400482_2892525 | 23 | cguacagaaucguguagaucucc  | 0 | 4 | 2 | 5  | 7  | 5 | 6  | 1 | 1 | 0 |
| scaffold381932_2743257 | 18 | caugaucgaucauggguc       | 0 | 4 | 2 | 5  | 4  | 5 | 4  | 0 | 2 | 0 |
| scaffold400765_2894635 | 23 | aaaaaacccgaccuggccuacc   | 0 | 4 | 2 | 2  | 10 | 3 | 8  | 0 | 2 | 0 |
| scaffold89289_649066   | 22 | cuuauccagacaacguuguauc   | 0 | 4 | 2 | 7  | 6  | 3 | 6  | 0 | 2 | 0 |
| scaffold204717_1464422 | 23 | aguaaccgaaccgaaccacccc   | 0 | 4 | 3 | 1  | 11 | 3 | 8  | 0 | 0 | 3 |
| scaffold454459_3478988 | 24 | uuuacugcuggaccgauuuuagcu | 0 | 4 | 3 | 9  | 5  | 5 | 5  | 0 | 0 | 3 |
| C15516969_4355982      | 24 | gagcuguucacuuacuaaacugac | 0 | 4 | 3 | 7  | 6  | 4 | 7  | 1 | 0 | 2 |
| scaffold90185_655553   | 24 | cuaauggccaccagucgacugagc | 0 | 4 | 3 | 4  | 8  | 6 | 6  | 1 | 0 | 2 |
| scaffold408689_2962411 | 20 | ucauacgaguaaggccuuacu    | 0 | 4 | 3 | 6  | 4  | 4 | 6  | 2 | 0 | 1 |
| scaffold117528_849798  | 24 | gagugauguaguacucccuugggu | 0 | 4 | 3 | 8  | 4  | 8 | 4  | 2 | 0 | 1 |
| scaffold39604_294874   | 18 | cagcggugaguagcccga       | 0 | 4 | 3 | 2  | 5  | 7 | 4  | 2 | 0 | 1 |
| scaffold347079_2481734 | 23 | caucgauuggaggcagauaggcc  | 0 | 4 | 3 | 4  | 5  | 8 | 6  | 3 | 0 | 0 |
| scaffold404506_2925425 | 23 | agguacaaaucugauccauugac  | 0 | 4 | 3 | 6  | 5  | 4 | 8  | 3 | 0 | 0 |
| C13296791_3759830      | 21 | acggaagaccacuuuaaagg     | 0 | 4 | 3 | 4  | 4  | 5 | 8  | 0 | 1 | 2 |
| C16276517_4638894      | 24 | ccuuuuccaagguacuggggacc  | 0 | 4 | 3 | 5  | 9  | 6 | 4  | 0 | 1 | 2 |
| scaffold8603_64162     | 24 | aggugaaggcuuucaagauggc   | 0 | 4 | 3 | 5  | 3  | 8 | 8  | 2 | 1 | 0 |
| C14624452_4094715      | 23 | aaauuuucgauguuuuaguuuacc | 0 | 4 | 3 | 10 | 3  | 3 | 7  | 2 | 1 | 0 |

|                        |    |                          |   |   |   |    |   |    |   |   |   |   |
|------------------------|----|--------------------------|---|---|---|----|---|----|---|---|---|---|
| scaffold222083_1597320 | 24 | gaagucuuuugcgguagaacgccu | 0 | 4 | 3 | 7  | 5 | 7  | 5 | 2 | 1 | 0 |
| scaffold296328_2117510 | 24 | agguucguuguuggacaggagcau | 0 | 4 | 3 | 7  | 3 | 9  | 5 | 2 | 1 | 0 |
| scaffold145868_1047435 | 22 | cucccagcacacaucauguguc   | 0 | 4 | 3 | 5  | 9 | 3  | 5 | 0 | 2 | 1 |
| C15330463_4296529      | 22 | cucccagcacacaucauguguc   | 0 | 4 | 3 | 5  | 9 | 3  | 5 | 0 | 2 | 1 |
| C17138584_5122878      | 23 | gcuaauuacaucgaugcaauagg  | 0 | 4 | 3 | 6  | 4 | 5  | 8 | 0 | 2 | 1 |
| scaffold106708_773871  | 21 | uaguccacauccucaacuac     | 0 | 4 | 3 | 5  | 9 | 1  | 6 | 0 | 2 | 1 |
| scaffold106708_773886  | 21 | uaguccacauccucaacuac     | 0 | 4 | 3 | 5  | 9 | 1  | 6 | 0 | 2 | 1 |
| scaffold166500_1196624 | 22 | gugugaccuggccugacgagg    | 0 | 4 | 3 | 4  | 6 | 9  | 3 | 0 | 2 | 1 |
| scaffold206450_1477502 | 24 | gagcugugggugcagaacagagcu | 0 | 4 | 3 | 4  | 4 | 10 | 6 | 1 | 2 | 0 |
| C16611244_4795567      | 24 | ugaaauuugguagaagugaucuac | 0 | 4 | 3 | 8  | 2 | 6  | 8 | 1 | 2 | 0 |
| scaffold10199_75975    | 23 | aaauaaguugucucucuaauuc   | 0 | 4 | 3 | 11 | 4 | 3  | 5 | 1 | 2 | 0 |
| scaffold400357_2891519 | 24 | accuccuucgacugcauuaaaugc | 0 | 4 | 3 | 7  | 8 | 3  | 6 | 0 | 3 | 0 |
| scaffold141061_1014428 | 24 | cuaugucucuaagucuaaccacu  | 0 | 4 | 3 | 10 | 7 | 2  | 5 | 0 | 3 | 0 |
| C15311339_4290582      | 24 | accagacauaugggacuccug    | 0 | 3 | 1 | 5  | 8 | 5  | 6 | 0 | 0 | 1 |
| scaffold33936_252812   | 24 | uuacaucguagucaaccguccgcg | 0 | 3 | 1 | 6  | 8 | 5  | 5 | 0 | 0 | 1 |
| scaffold84554_615154   | 24 | agguaggaucgagacucuuccacu | 0 | 3 | 1 | 6  | 6 | 6  | 6 | 0 | 0 | 1 |
| scaffold413573_3004996 | 24 | aggcgccgugaauuggugaacaau | 0 | 3 | 1 | 5  | 4 | 8  | 7 | 0 | 0 | 1 |
| C17293573_5252098      | 18 | uuaccgguacauuaaaau       | 0 | 3 | 1 | 6  | 3 | 3  | 6 | 0 | 0 | 1 |
| C13174818_3729394      | 24 | uaauuaggcgacguagauacuauu | 0 | 3 | 1 | 9  | 3 | 5  | 7 | 0 | 0 | 1 |
| C14012759_3940688      | 24 | ucucguauggccaauuuuguuauu | 0 | 3 | 1 | 12 | 4 | 4  | 4 | 0 | 0 | 1 |
| scaffold395905_2855092 | 20 | acauguuuacucucaucuaa     | 0 | 3 | 1 | 8  | 5 | 1  | 6 | 1 | 0 | 0 |
| scaffold378437_2716078 | 24 | gcuuauacucgcuugucaucgagc | 0 | 3 | 1 | 8  | 7 | 5  | 4 | 1 | 0 | 0 |
| C16794347_4893920      | 24 | guguauacuacucgcuugacaug  | 0 | 3 | 1 | 9  | 5 | 5  | 5 | 1 | 0 | 0 |
| scaffold397619_2869165 | 24 | agguucgagucuaaacggggggu  | 0 | 3 | 1 | 5  | 4 | 10 | 5 | 1 | 0 | 0 |
| scaffold266957_1909078 | 21 | auccaacgaucgaggagccgg    | 0 | 3 | 1 | 2  | 6 | 7  | 6 | 1 | 0 | 0 |
| C17019901_5035238      | 24 | uggaugaauucgaauccuguccu  | 0 | 3 | 1 | 8  | 5 | 6  | 5 | 0 | 1 | 0 |

|                        |    |                          |   |   |   |    |   |    |    |   |   |   |
|------------------------|----|--------------------------|---|---|---|----|---|----|----|---|---|---|
| scaffold371684_2665362 | 24 | ggugugggaugugggaaaguugag | 0 | 3 | 1 | 6  | 0 | 13 | 5  | 0 | 1 | 0 |
| scaffold455352_3496194 | 24 | gagaaucccgauggaccgcacc   | 0 | 3 | 1 | 2  | 9 | 6  | 7  | 0 | 1 | 0 |
| C16571088_4775121      | 24 | uugaaucgaggagcgccuuauugc | 0 | 3 | 2 | 7  | 5 | 7  | 5  | 0 | 0 | 2 |
| C13491150_3809123      | 21 | guacgauuggggaacuacgc     | 0 | 3 | 2 | 5  | 4 | 7  | 5  | 0 | 0 | 2 |
| C17230653_5197505      | 24 | gaaguuugggcugccuaaaaggcc | 0 | 3 | 2 | 5  | 5 | 8  | 6  | 0 | 0 | 2 |
| scaffold13998_105218   | 24 | ugccccuggacagguuuuuaacu  | 0 | 3 | 2 | 7  | 6 | 6  | 5  | 0 | 0 | 2 |
| scaffold5445_40961     | 24 | acaaaauuuugucgucgacaaac  | 0 | 3 | 2 | 7  | 6 | 3  | 8  | 1 | 0 | 1 |
| scaffold344100_2459162 | 24 | gcuuuuuuucggugccuagggcg  | 0 | 3 | 2 | 8  | 6 | 7  | 3  | 1 | 0 | 1 |
| C17176958_5152309      | 24 | auuuuuaccgacauguuuacgug  | 0 | 3 | 2 | 10 | 4 | 4  | 6  | 1 | 0 | 1 |
| scaffold342771_2449830 | 24 | aaguacuauaagugaguagggagu | 0 | 3 | 2 | 6  | 1 | 8  | 9  | 1 | 0 | 1 |
| C17139906_5123874      | 24 | auuguuugacugaguacaucgcg  | 0 | 3 | 2 | 8  | 4 | 6  | 6  | 2 | 0 | 0 |
| C17345327_5297726      | 24 | auggacuugauugcugacugggcg | 0 | 3 | 2 | 7  | 4 | 9  | 4  | 2 | 0 | 0 |
| C14070405_3954186      | 24 | uaaaaugcgcggagcguuugucac | 0 | 3 | 2 | 6  | 5 | 7  | 6  | 2 | 0 | 0 |
| scaffold14923_112484   | 21 | gguugucuuuggggagagugg    | 0 | 3 | 2 | 7  | 1 | 11 | 2  | 2 | 0 | 0 |
| scaffold450239_3406500 | 24 | auuguuugcugaguacaucgcg   | 0 | 3 | 2 | 8  | 4 | 7  | 5  | 2 | 0 | 0 |
| scaffold62620_460168   | 24 | acuggaugauucagucuauggagc | 0 | 3 | 2 | 7  | 4 | 7  | 6  | 2 | 0 | 0 |
| C17293363_5252010      | 21 | agaugaucuacggacggacc     | 0 | 3 | 2 | 3  | 6 | 6  | 6  | 2 | 0 | 0 |
| scaffold378609_2717561 | 24 | gagguggccagaccuuauugagc  | 0 | 3 | 2 | 5  | 5 | 8  | 6  | 2 | 0 | 0 |
| C17432744_5383217      | 20 | uuuaaaagcaauuggauugg     | 0 | 3 | 2 | 7  | 1 | 5  | 7  | 2 | 0 | 0 |
| scaffold268765_1921650 | 24 | accagcaacuuggauuuuugccc  | 0 | 3 | 2 | 6  | 7 | 5  | 6  | 2 | 0 | 0 |
| C14472276_4054786      | 23 | uuuaguaccauuuuuuagcacc   | 0 | 3 | 2 | 10 | 5 | 2  | 6  | 0 | 1 | 1 |
| C14886548_4166532      | 23 | uuuaguaccauuuuuuagcacc   | 0 | 3 | 2 | 10 | 5 | 2  | 6  | 0 | 1 | 1 |
| C13522182_3817050      | 21 | agaugcgaccggcgucucc      | 0 | 3 | 2 | 3  | 8 | 7  | 3  | 0 | 1 | 1 |
| scaffold317189_2266491 | 20 | uaguaaucaggauuacugcc     | 0 | 3 | 2 | 6  | 4 | 4  | 6  | 0 | 1 | 1 |
| scaffold31628_236811   | 24 | aucuccaacgguaguguauuuuu  | 0 | 3 | 2 | 10 | 4 | 4  | 6  | 0 | 1 | 1 |
| scaffold130017_937066  | 24 | acgaauaaccaguagaugaagagg | 0 | 3 | 2 | 3  | 3 | 7  | 11 | 1 | 1 | 0 |

|                        |    |                           |   |   |   |    |   |    |    |   |   |   |
|------------------------|----|---------------------------|---|---|---|----|---|----|----|---|---|---|
| C16934381_4978919      | 24 | uccaaauuguguaaggcggcgcuu  | 0 | 3 | 2 | 7  | 5 | 8  | 4  | 0 | 2 | 0 |
| scaffold271704_1943254 | 24 | uccugaguaaguguaacaaauacac | 0 | 3 | 2 | 6  | 5 | 4  | 9  | 0 | 2 | 0 |
| C16667388_4824411      | 24 | ggcuucuuuguccuccugggacuc  | 0 | 3 | 2 | 9  | 8 | 6  | 1  | 0 | 2 | 0 |
| scaffold410467_2977623 | 24 | uuaaagcucugcuaucauuugacc  | 0 | 3 | 2 | 9  | 6 | 3  | 6  | 0 | 2 | 0 |
| scaffold451638_3428378 | 20 | uuuccgucgcgaauauauug      | 0 | 3 | 2 | 8  | 4 | 4  | 4  | 0 | 2 | 0 |
| C17179398_5154358      | 23 | ucgcacgugaaggggaguguuga   | 0 | 3 | 2 | 5  | 3 | 10 | 5  | 0 | 2 | 0 |
| C16500946_4740751      | 24 | gguucaaagucgcgguuuuggguc  | 0 | 3 | 2 | 8  | 4 | 9  | 3  | 0 | 2 | 0 |
| scaffold436641_3230951 | 21 | aguaaaugguauauuacucuu     | 0 | 2 | 1 | 8  | 2 | 3  | 8  | 0 | 0 | 1 |
| scaffold51651_380756   | 23 | aaaacucgaagcuuugccgaaau   | 0 | 2 | 1 | 5  | 5 | 4  | 9  | 0 | 0 | 1 |
| C16226547_4618066      | 24 | ccucacacaacacaugauguguug  | 0 | 2 | 1 | 6  | 7 | 4  | 7  | 0 | 0 | 1 |
| scaffold444498_3325088 | 24 | uauggcuugcaguucacacugguu  | 0 | 2 | 1 | 9  | 4 | 6  | 5  | 0 | 0 | 1 |
| scaffold415243_3019949 | 24 | ccaauuccugccaguuacacaugac | 0 | 2 | 1 | 6  | 9 | 3  | 6  | 0 | 0 | 1 |
| scaffold91358_664302   | 19 | aaaaggaauuccauagaau       | 0 | 2 | 1 | 4  | 2 | 3  | 10 | 0 | 0 | 1 |
| scaffold207978_1488845 | 23 | aggagacguacaauaugu        | 0 | 2 | 1 | 5  | 3 | 6  | 9  | 0 | 0 | 1 |
| scaffold30530_228679   | 20 | cuucuuguuugacauaaauu      | 0 | 2 | 1 | 10 | 3 | 2  | 5  | 0 | 0 | 1 |
| C17006165_5025710      | 24 | acagauugcaguacaguauugcgc  | 0 | 2 | 1 | 5  | 5 | 6  | 8  | 0 | 0 | 1 |
| scaffold168995_1209636 | 22 | uguagucugguucugaggac      | 0 | 2 | 1 | 8  | 3 | 8  | 3  | 0 | 0 | 1 |
| scaffold438843_3255960 | 23 | caaugacagucacaaaaaugaa    | 0 | 2 | 1 | 4  | 4 | 3  | 12 | 0 | 0 | 1 |
| scaffold200984_1437230 | 24 | cgggucacgugauugggcucgacu  | 0 | 2 | 1 | 6  | 6 | 9  | 3  | 0 | 0 | 1 |
| C16930467_4976500      | 22 | aucaucaacgcugaauccgaac    | 0 | 2 | 1 | 4  | 7 | 3  | 8  | 0 | 0 | 1 |
| C17300163_5260048      | 22 | ccugugggacucucugcuucu     | 0 | 2 | 1 | 9  | 7 | 5  | 1  | 0 | 0 | 1 |
| scaffold280696_2006965 | 24 | acauacgaaguauauaugcgccu   | 0 | 2 | 1 | 7  | 5 | 4  | 8  | 0 | 0 | 1 |
| scaffold59143_435798   | 24 | aucgguuagccccgucgacacgc   | 0 | 2 | 1 | 5  | 9 | 6  | 4  | 0 | 0 | 1 |
| scaffold390306_2809080 | 20 | uuuuuuucggguugggucaa      | 0 | 2 | 1 | 9  | 2 | 6  | 3  | 0 | 0 | 1 |
| C17385470_5333545      | 21 | augacaagcgaguaaagcauu     | 0 | 2 | 1 | 4  | 3 | 5  | 9  | 0 | 0 | 1 |
| scaffold353598_2530523 | 24 | aggcucuaagaagucuagugucc   | 0 | 2 | 1 | 6  | 6 | 6  | 6  | 0 | 0 | 1 |

|                        |    |                           |   |   |   |    |   |    |    |   |   |   |
|------------------------|----|---------------------------|---|---|---|----|---|----|----|---|---|---|
| scaffold287792_2057643 | 25 | uuacguaugugguaugucugugcu  | 0 | 2 | 1 | 11 | 3 | 8  | 3  | 0 | 0 | 1 |
| scaffold294150_2102006 | 24 | cgguucgugcgguggcgugcgg    | 0 | 2 | 1 | 7  | 5 | 12 | 0  | 0 | 0 | 1 |
| scaffold166557_1192815 | 22 | agccauuuagcacuaugaacac    | 0 | 2 | 1 | 5  | 6 | 3  | 8  | 0 | 0 | 1 |
| scaffold358053_2563050 | 24 | cugaugugauaugaugcgucacu   | 0 | 2 | 1 | 9  | 4 | 6  | 5  | 0 | 0 | 1 |
| scaffold451753_3430488 | 24 | gcuucaucgaugccgauagacacc  | 0 | 2 | 1 | 5  | 8 | 5  | 6  | 0 | 0 | 1 |
| scaffold447611_3367302 | 24 | gguuuuuaucggucgucaauggcu  | 0 | 2 | 1 | 10 | 4 | 7  | 3  | 0 | 0 | 1 |
| scaffold176866_1264022 | 24 | agguuuccuccgagcuccuugcac  | 0 | 2 | 1 | 7  | 9 | 5  | 3  | 0 | 0 | 1 |
| scaffold176866_1264021 | 24 | agguuuccuccgagcuccuugcac  | 0 | 2 | 1 | 7  | 9 | 5  | 3  | 0 | 0 | 1 |
| scaffold127495_926891  | 22 | cacucguauagaccuuuuuuuu    | 0 | 2 | 1 | 9  | 5 | 3  | 5  | 0 | 0 | 1 |
| C17267525_5229362      | 23 | aacguacgucuuuagcgacgu     | 0 | 2 | 1 | 6  | 6 | 5  | 6  | 1 | 0 | 0 |
| C13726313_3870553      | 23 | cgucgucgucgucaccuggacgg   | 0 | 2 | 1 | 5  | 8 | 8  | 2  | 1 | 0 | 0 |
| scaffold95835_696570   | 21 | uguuggaggcuugagagggac     | 0 | 2 | 1 | 5  | 2 | 10 | 4  | 1 | 0 | 0 |
| scaffold406862_2945997 | 24 | gcuugucguauaacaaucccaac   | 0 | 2 | 1 | 6  | 7 | 3  | 8  | 1 | 0 | 0 |
| scaffold166557_1192794 | 24 | auuuuagcaccagauauuuuac    | 0 | 2 | 1 | 9  | 6 | 2  | 7  | 1 | 0 | 0 |
| scaffold455865_3506578 | 23 | aucgagucgguuuuuguugucg    | 0 | 2 | 1 | 10 | 3 | 8  | 2  | 1 | 0 | 0 |
| scaffold447005_3359390 | 23 | cguaggugcaaaagucuuuugc    | 0 | 2 | 1 | 7  | 4 | 7  | 5  | 1 | 0 | 0 |
| scaffold66764_488963   | 24 | auaaaauagagagccaaagagguu  | 0 | 2 | 1 | 5  | 2 | 6  | 11 | 1 | 0 | 0 |
| C14355693_4024591      | 21 | cggaggggucgagucugagcc     | 0 | 2 | 1 | 3  | 5 | 10 | 3  | 1 | 0 | 0 |
| scaffold306639_2189682 | 24 | gggaucgaguaggauugcagcgc   | 0 | 2 | 1 | 4  | 5 | 10 | 5  | 1 | 0 | 0 |
| scaffold352710_2524328 | 24 | agcauugaauuggaguuuuccaaac | 0 | 2 | 1 | 7  | 4 | 5  | 8  | 1 | 0 | 0 |
| scaffold66939_490396   | 23 | uuuuagugacgguuuuuauaucgc  | 0 | 2 | 1 | 11 | 4 | 5  | 3  | 1 | 0 | 0 |
| scaffold449701_3398063 | 23 | guaaaacuguaauaaaaagaacc   | 0 | 2 | 1 | 4  | 3 | 3  | 13 | 1 | 0 | 0 |
| C16787741_4890126      | 23 | ucggagauggacucgagcgga     | 0 | 2 | 1 | 3  | 4 | 10 | 6  | 1 | 0 | 0 |
| scaffold317801_2270788 | 23 | ccacaaaauaguaguaaacacuu   | 0 | 2 | 1 | 6  | 5 | 2  | 10 | 1 | 0 | 0 |
| scaffold121691_877798  | 21 | gaggagguagccucguauga      | 0 | 2 | 1 | 5  | 3 | 8  | 5  | 1 | 0 | 0 |
| scaffold296096_2115234 | 24 | cuuaggagauguacaauuggucaau | 0 | 2 | 1 | 8  | 3 | 6  | 7  | 1 | 0 | 0 |

|                        |    |                           |   |   |   |    |   |   |    |   |   |   |
|------------------------|----|---------------------------|---|---|---|----|---|---|----|---|---|---|
| scaffold344418_2461570 | 24 | ugcuuguuuuuguguuagaaagcug | 0 | 2 | 1 | 11 | 2 | 7 | 4  | 1 | 0 | 0 |
| scaffold249093_1782160 | 24 | gaugucacugaaguaaguggaac   | 0 | 2 | 1 | 5  | 3 | 8 | 8  | 1 | 0 | 0 |
| scaffold411484_2986616 | 24 | aauccucaccauauagccagagcu  | 0 | 2 | 1 | 5  | 8 | 3 | 8  | 1 | 0 | 0 |
| scaffold284961_2037227 | 24 | gagaauuuucguagacauacu     | 0 | 2 | 1 | 8  | 3 | 5 | 8  | 1 | 0 | 0 |
| scaffold440568_3275872 | 21 | uuccacucugauuggguuaug     | 0 | 2 | 1 | 8  | 4 | 5 | 4  | 0 | 1 | 0 |
| C13247219_3747494      | 24 | ccauuuuuuuggcacuuuauacc   | 0 | 2 | 1 | 11 | 6 | 2 | 5  | 0 | 1 | 0 |
| C15324537_4294666      | 21 | gauaacucggauguugagcgg     | 0 | 2 | 1 | 5  | 3 | 8 | 5  | 0 | 1 | 0 |
| scaffold82048_596400   | 24 | uugucgcgcgacaauggcuucc    | 0 | 2 | 1 | 6  | 8 | 6 | 4  | 0 | 1 | 0 |
| scaffold456829_3528275 | 24 | uuuauuuuuuagacauugcccc    | 0 | 2 | 1 | 10 | 5 | 2 | 7  | 0 | 1 | 0 |
| scaffold166978_1195838 | 24 | accgaggcauuuugaguuaaaac   | 0 | 2 | 1 | 6  | 4 | 5 | 9  | 0 | 1 | 0 |
| scaffold70557_515530   | 24 | uuuauaguuguccauuguucuuu   | 0 | 2 | 1 | 14 | 3 | 3 | 4  | 0 | 1 | 0 |
| scaffold211486_1514110 | 21 | uuuagugacuuuuucguug       | 0 | 2 | 1 | 12 | 2 | 5 | 2  | 0 | 1 | 0 |
| scaffold345782_2471701 | 24 | auuccaagcauacucaugagcucu  | 0 | 2 | 1 | 7  | 7 | 3 | 7  | 0 | 1 | 0 |
| scaffold73004_532906   | 24 | aaggagggcagcucagcaaguacc  | 0 | 2 | 1 | 2  | 6 | 8 | 8  | 0 | 1 | 0 |
| scaffold181026_1293518 | 24 | cuccuucggauauccauuaaacac  | 0 | 2 | 1 | 7  | 8 | 2 | 7  | 0 | 1 | 0 |
| scaffold115022_832140  | 24 | cauuccaaaaucauuuagugac    | 0 | 2 | 1 | 8  | 6 | 2 | 8  | 0 | 1 | 0 |
| C17424875_5371308      | 22 | cucgagagcggguuguucac      | 0 | 2 | 1 | 5  | 7 | 7 | 3  | 0 | 1 | 0 |
| scaffold39739_295644   | 24 | gugauuuuuuuuugaaacgagggc  | 0 | 2 | 1 | 8  | 2 | 7 | 7  | 0 | 1 | 0 |
| scaffold262765_1878978 | 24 | caauguguguugccuaggcucaau  | 0 | 2 | 1 | 8  | 5 | 6 | 5  | 0 | 1 | 0 |
| scaffold23178_173122   | 24 | uccgguuuuugguaaaguggugcu  | 0 | 2 | 1 | 9  | 3 | 8 | 4  | 0 | 1 | 0 |
| scaffold192380_1375135 | 18 | uuucuuaggcgacguagg        | 0 | 2 | 1 | 6  | 3 | 6 | 3  | 0 | 1 | 0 |
| C14704542_4116397      | 18 | uuucuuaggcgacguagg        | 0 | 2 | 1 | 6  | 3 | 6 | 3  | 0 | 1 | 0 |
| scaffold247808_1773224 | 24 | uggcacuuaacccauucuaugggc  | 0 | 2 | 1 | 7  | 7 | 5 | 5  | 0 | 1 | 0 |
| C13997971_3937283      | 23 | aaauacuagaggauugcuaaaugc  | 0 | 2 | 1 | 5  | 3 | 5 | 10 | 0 | 1 | 0 |
| scaffold97498_707837   | 24 | uuucaacauuccagcauucguc    | 0 | 2 | 1 | 7  | 8 | 2 | 7  | 0 | 1 | 0 |
| C14457462_4050890      | 21 | gcacuuggcugcugcauuacc     | 0 | 2 | 1 | 6  | 7 | 5 | 3  | 0 | 1 | 0 |

Supplementary Table 7. Differentially expressed miRNAs identified in the three libraries of SO1, SO2, and SO3.

| <b>Type</b> | <b>num</b> | <b>up</b> | <b>down</b> |
|-------------|------------|-----------|-------------|
| SO1 vs SO2  | 600        | 24        | 576         |
| SO1 vs SO3  | 514        | 165       | 349         |
| SO2 vs SO3  | 742        | 593       | 149         |

Supplementary Table 8. Experimentally identified miRNAs and their target genes.

| <b>miRNA name</b> | <b>Target gene</b>      |
|-------------------|-------------------------|
| U436803           | FLJ623552,<br>FLJ622887 |
| U3692923          | FLJ626117,<br>FLJ617315 |
| U3938865          | FLJ575285               |
| U4351355          | FLJ613583               |
| U3400834          | FLJ622616               |
| U805963           | FLJ419428               |
| U1645883          | FLJ602301               |
| U977315           | FLJ527490               |
